# Supplementary material for: Data-driven stabilization of NimPdn–m nanoalloys: a study using density functional theory and data mining approaches
Source: Royal Society of Chemistry journal article supplement (doi:10.1039/d4cp00672k), 2024-01-01
Supplement: d4cp00672k1.zip [file d4cp00672k1.zip]

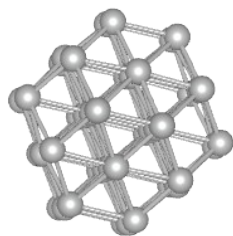

$\text{Pd}_{41}$

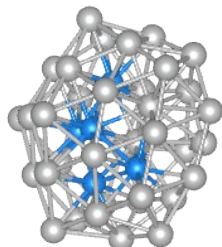

$\text{Ni}_5\text{Pd}_{36}$

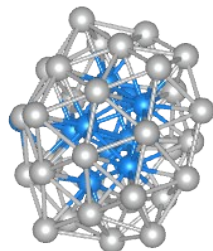

$\text{Ni}_{10}\text{Pd}_{31}$

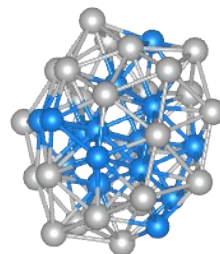

$\text{Ni}_{15}\text{Pd}_{26}$

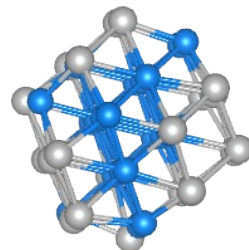

$\text{Ni}_{20}\text{Pd}_{21}$

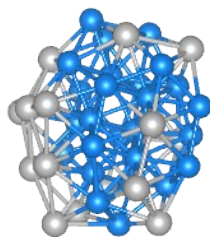

$\text{Ni}_{26}\text{Pd}_{15}$

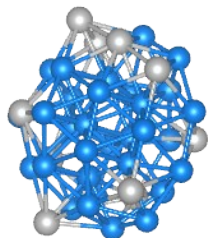

$\text{Ni}_{31}\text{Pd}_{10}$

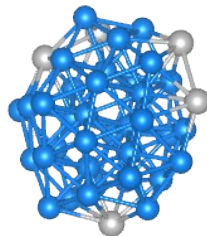

$\text{Ni}_{36}\text{Pd}_5$

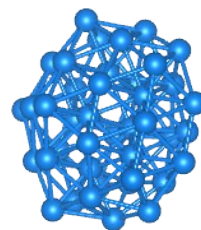

$\text{Ni}_{41}$
