# Supplementary material for: Data-driven stabilization of NimPdn–m nanoalloys: a study using density functional theory and data mining approaches
Source: Royal Society of Chemistry journal article supplement (doi:10.1039/d4cp00672k), 2024-01-01
Supplement: d4cp00672k1.zip [file d4cp00672k1.zip]

|                      | $Ni_3Pd_{24}$ | $Ni_7Pd_{20}$ | $Ni_{10}Pd_{17}$ | $Ni_{14}Pd_{13}$ | $Ni_{17}Pd_{10}$ | $Ni_{20}Pd_7$ | $Ni_{24}Pd_3$ |
|----------------------|---------------|---------------|------------------|------------------|------------------|---------------|---------------|
| $E_{exc}$            | 1.00          | 1.00          | 1.00             | 1.00             | 1.00             | 1.00          | 1.00          |
| $E_{gap}^{majority}$ |               | 0.35          | 0.58             | 0.48             |                  | -0.51         | -0.59         |
| $E_{gap}^{minority}$ | -0.29         | 0.36          |                  |                  |                  |               |               |
| $E_{gap}^{global}$   | -0.38         | 0.33          |                  |                  |                  |               |               |
| $m_{tot}$            |               | 0.52          |                  | -0.32            |                  | -0.35         |               |
| $ECN_{av}$           |               | -0.50         | -0.65            | -0.67            | -0.67            | -0.51         | -0.66         |
| $ECN_{av}^{Ni}$      | -0.63         | -0.89         | -0.82            | -0.95            | -0.97            | -0.95         | -0.95         |
| $ECN_{av}^{Pd}$      | 0.41          | 0.81          | 0.63             | 0.62             | 0.73             | 0.59          | 0.57          |
| $d_{av}$             | 0.37          | 0.36          |                  |                  |                  | 0.25          |               |
| $d_{av}^{Ni}$        |               | -0.32         |                  |                  |                  |               |               |
| $d_{av}^{Pd}$        | 0.30          | 0.51          |                  |                  |                  |               | -0.55         |
| $N_b$                |               |               | -0.63            | -0.62            | -0.56            | -0.43         | -0.42         |
| $N_b^{Ni}$           | -0.39         | -0.68         | -0.69            | -0.80            | -0.75            | -0.60         | -0.93         |
| $N_b^{Ni-Pd}$        | -0.53         | -0.75         |                  |                  |                  |               | 0.69          |
| $N_b^{Pd}$           | 0.65          | 0.89          | 0.82             | 0.70             | 0.66             | 0.37          |               |
| $\sigma$             | 0.57          | 0.79          |                  |                  | -0.35            |               | -0.72         |
| $R_{av}$             | -0.34         |               | 0.38             | 0.44             | 0.36             |               | 0.63          |
| Volume               | 0.41          | 0.80          | 0.81             | 0.86             | 0.85             | 0.77          | 0.86          |
| Density              | -0.41         | -0.80         | -0.81            | -0.86            | -0.85            | -0.77         | -0.86         |
| $RMSD^{Ni27}$        |               | 0.26          | 0.45             | 0.53             | 0.46             | 0.36          | 0.38          |
| $RMSD^{Pd27}$        |               |               | -0.43            | -0.58            | -0.42            | -0.29         | -0.67         |
| $UC^{Ni}$            | 0.53          | 0.90          | 0.90             | 0.90             | 0.96             | 0.87          | 0.91          |
| $UC^{Pd}$            | -0.50         | -0.90         | -0.86            | -0.79            | -0.91            | -0.84         | -0.72         |
| $D_{av}^{Ni}$ (Å)    | 0.73          | 0.89          | 0.73             | 0.90             | 0.95             | 0.83          | 0.96          |
| $D_{av}^{Pd}$ (Å)    | -0.61         | -0.90         | -0.78            | -0.83            | -0.85            | -0.58         | -0.68         |
