# Supplementary material for: Data-driven stabilization of NimPdn–m nanoalloys: a study using density functional theory and data mining approaches
Source: Royal Society of Chemistry journal article supplement (doi:10.1039/d4cp00672k), 2024-01-01
Supplement: d4cp00672k1.zip [file d4cp00672k1.zip]

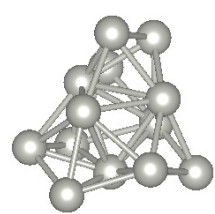

$\text{Pd}_{13}$

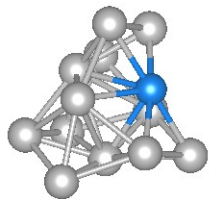

$\text{NiPd}_{12}$

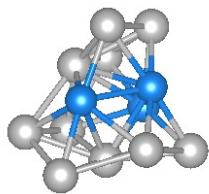

$\text{Ni}_3\text{Pd}_{10}$

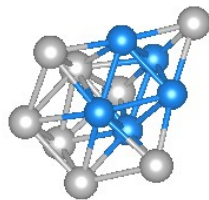

$\text{Ni}_5\text{Pd}_8$

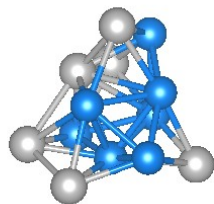

$\text{Ni}_7\text{Pd}_6$

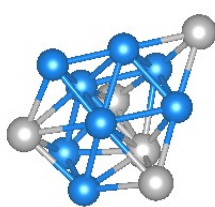

$\text{Ni}_8\text{Pd}_5$

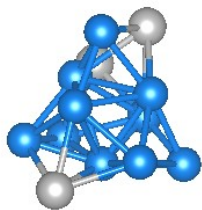

$\text{Ni}_{10}\text{Pd}_3$

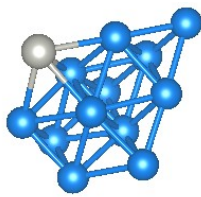

$\text{Ni}_{12}\text{Pd}$

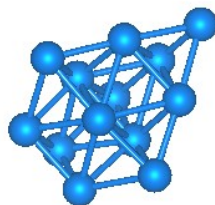

$\text{Ni}_{13}$
