# Supplementary material for: Data-driven stabilization of NimPdn–m nanoalloys: a study using density functional theory and data mining approaches
Source: Royal Society of Chemistry journal article supplement (doi:10.1039/d4cp00672k), 2024-01-01
Supplement: d4cp00672k1.zip [file d4cp00672k1.zip]

|                      | $Ni_{12}Pd_{12}$ | $Ni_{13}Pd_{10}$ | $Ni_{15}Pd_8$ | $Ni_{17}Pd_6$ | $Ni_{18}Pd_5$ | $Ni_{10}Pd_3$ | $Ni_{12}Pd_1$ |
|----------------------|------------------|------------------|---------------|---------------|---------------|---------------|---------------|
| $E_{exc}$            | 1.00             | 1.00             | 1.00          | 1.00          | 1.00          | 1.00          | 1.00          |
| $E_{gap}^{majority}$ | -0.47            | -0.56            | -0.56         | -0.40         |               | -0.44         | -0.36         |
| $E_{gap}^{minority}$ |                  |                  | 0.44          |               | -0.27         |               | -0.67         |
| $E_{gap}^{global}$   | -0.27            |                  | 0.44          | 0.28          |               | -0.28         | -0.67         |
| $m_{tot}$            | -0.54            | -0.61            | -0.55         |               | 0.50          | 0.31          |               |
| $ECN_{av}$           | -0.74            | -0.56            | -0.40         |               | -0.40         |               |               |
| $ECN_{av}^{Ni}$      | -0.76            | -0.91            | -0.81         | -0.97         | -0.88         | -0.75         | -0.68         |
| $ECN_{av}^{Pd}$      |                  | 0.78             | 0.69          | 0.95          | 0.89          | 0.86          | 0.85          |
| $d_{av}$             |                  |                  | 0.58          | 0.54          | 0.67          | 0.53          | 0.62          |
| $d_{av}^{Ni}$        | -0.71            | -0.66            |               | -0.41         |               |               | 0.47          |
| $d_{av}^{Pd}$        |                  | 0.67             | 0.48          | 0.82          | 0.59          | 0.51          | 0.86          |
| $N_b$                | -0.59            | -0.46            | 0.44          | 0.29          |               | 0.26          |               |
| $N_b^{Ni}$           |                  | -0.64            | -0.67         | -0.70         | -0.54         | -0.76         | -0.71         |
| $N_b^{Ni-Pd}$        | -0.78            | -0.75            |               |               |               | 0.73          | 0.94          |
| $N_b^{Pd}$           | 0.40             | 0.87             | 0.68          | 0.94          | 0.72          | 0.42          |               |
| $\sigma$             | 0.75             | 0.75             |               | 0.29          |               | -0.73         | -0.82         |
| $R_{av}$             | 0.28             | 0.26             | -0.34         | -0.49         |               |               | -0.36         |
| Volume               |                  |                  | 0.47          | 0.44          | 0.51          |               | 0.50          |
| Density              |                  |                  | -0.47         | -0.44         | -0.51         |               | -0.50         |
| $RMSD^{Ni13}$        | -0.45            | -0.30            |               | 0.30          |               | 0.31          |               |
| $RMSD^{Pd13}$        | 0.34             | 0.32             | -0.37         |               |               |               | -0.63         |
| $UC^{Ni}$            |                  |                  |               |               |               |               |               |
| $UC^{Pd}$            |                  |                  |               |               |               |               |               |
| $D_{av}^{Ni}$ (Å)    | 0.79             | 0.86             | 0.78          | 0.88          | 0.93          | 0.56          | 0.71          |
| $D_{av}^{Pd}$ (Å)    | -0.49            | -0.87            | -0.77         | -0.90         | -0.94         | -0.74         | -0.88         |
