# Supplementary material for: Data-driven stabilization of NimPdn–m nanoalloys: a study using density functional theory and data mining approaches
Source: Royal Society of Chemistry journal article supplement (doi:10.1039/d4cp00672k), 2024-01-01
Supplement: d4cp00672k1.zip [file d4cp00672k1.zip]

|                                    | Ni <sub>5</sub> Pd <sub>36</sub> | Ni <sub>10</sub> Pd <sub>31</sub> | Ni <sub>15</sub> Pd <sub>26</sub> | Ni <sub>20</sub> Pd <sub>21</sub> | Ni <sub>26</sub> Pd <sub>15</sub> | Ni <sub>31</sub> Pd <sub>10</sub> | Ni <sub>36</sub> Pd <sub>5</sub> |
|------------------------------------|----------------------------------|-----------------------------------|-----------------------------------|-----------------------------------|-----------------------------------|-----------------------------------|----------------------------------|
| $E_{\text{exc}}$                   | 1.00                             | 1.00                              | 1.00                              | 1.00                              | 1.00                              | 1.00                              | 1.00                             |
| $E_{\text{gap}}^{\text{majority}}$ |                                  | 0.43                              |                                   | -0.37                             |                                   | 0.36                              |                                  |
| $E_{\text{gap}}^{\text{minority}}$ | -0.32                            | 0.31                              |                                   | 0.46                              |                                   |                                   | 0.51                             |
| $E_{\text{gap}}^{\text{global}}$   | -0.39                            | 0.31                              |                                   | 0.45                              |                                   |                                   | 0.50                             |
| $m_{\text{tot}}$                   | 0.49                             | 0.56                              | -0.40                             |                                   | 0.57                              | 0.60                              | 0.42                             |
| $ECN_{\text{av}}$                  | -0.66                            | -0.93                             | -0.49                             | -0.46                             | -0.32                             | -0.77                             | -0.69                            |
| $ECN_{\text{av}}^{\text{Ni}}$      | -0.93                            | -0.85                             | -0.94                             | -0.87                             | -0.85                             | -0.92                             | -0.89                            |
| $ECN_{\text{av}}^{\text{Pd}}$      | 0.95                             | 0.85                              | 0.92                              | 0.89                              | 0.84                              | 0.81                              | 0.77                             |
| $d_{\text{av}}$                    | 0.59                             | 0.80                              | 0.67                              | 0.79                              | 0.77                              | 0.62                              | 0.64                             |
| $d_{\text{av}}^{\text{Ni}}$        | -0.65                            | -0.26                             |                                   | 0.53                              |                                   | 0.57                              | 0.61                             |
| $d_{\text{av}}^{\text{Pd}}$        | 0.70                             | 0.75                              | 0.66                              | 0.54                              | 0.44                              |                                   | -0.45                            |
| $N_b$                              |                                  |                                   | -0.55                             |                                   |                                   | -0.84                             |                                  |
| $N_b^{\text{Ni}}$                  | -0.51                            | -0.84                             | -0.53                             | -0.70                             | -0.38                             | -0.87                             | -0.87                            |
| $N_b^{\text{Ni}-\text{Pd}}$        | -0.86                            | -0.60                             |                                   | 0.36                              |                                   | 0.51                              | 0.55                             |
| $N_b^{\text{Pd}}$                  | 0.86                             | 0.83                              | 0.79                              | 0.75                              | 0.71                              | 0.63                              | 0.41                             |
| $\sigma$                           | 0.86                             | 0.53                              |                                   | -0.40                             |                                   | -0.68                             | -0.64                            |
| $R_{\text{av}}$                    |                                  |                                   | -0.57                             |                                   |                                   | -0.31                             |                                  |
| Volume                             | 0.75                             | 0.92                              | 0.92                              | 0.87                              | 0.91                              | 0.89                              | 0.80                             |
| Density                            | -0.75                            | -0.92                             | -0.92                             | -0.87                             | -0.91                             | -0.89                             | -0.80                            |
| $RMSD^{\text{Ni}41}$               | 0.40                             | 0.48                              | 0.58                              |                                   | 0.27                              | 0.67                              | 0.28                             |
| $RMSD^{\text{Pd}41}$               |                                  |                                   | -0.38                             |                                   |                                   | -0.61                             | -0.45                            |
| $UC^{\text{Ni}}$                   | 0.94                             | 0.95                              | 0.93                              | 0.91                              | 0.85                              | 0.84                              | 0.86                             |
| $UC^{\text{Pd}}$                   | -0.94                            | -0.95                             | -0.91                             | -0.91                             | -0.85                             | -0.84                             | -0.86                            |
| $D_{\text{av}}^{\text{Ni}}$ (Å)    | 0.94                             | 0.95                              | 0.94                              | 0.90                              | 0.86                              | 0.91                              | 0.77                             |
| $D_{\text{av}}^{\text{Pd}}$ (Å)    | -0.93                            | -0.96                             | -0.93                             | -0.90                             | -0.86                             | -0.91                             | -0.73                            |
