# Supplementary material for: Data-driven stabilization of NimPdn–m nanoalloys: a study using density functional theory and data mining approaches
Source: Royal Society of Chemistry journal article supplement (doi:10.1039/d4cp00672k), 2024-01-01
Supplement: d4cp00672k1.zip [file d4cp00672k1.zip]

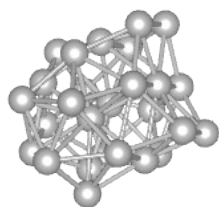

$\text{Pd}_{27}$

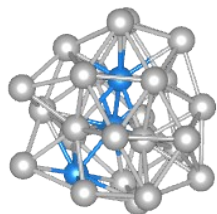

$\text{Ni}_3\text{Pd}_{24}$

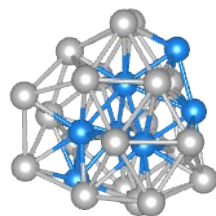

$\text{Ni}_7\text{Pd}_{20}$

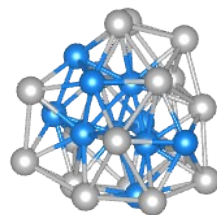

$\text{Ni}_{10}\text{Pd}_{17}$

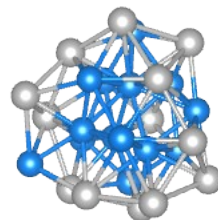

$\text{Ni}_{14}\text{Pd}_{13}$

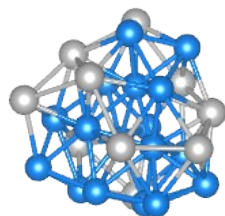

$\text{Ni}_{17}\text{Pd}_{10}$

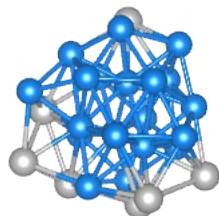

$\text{Ni}_{20}\text{Pd}_7$

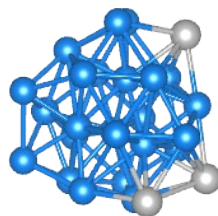

$\text{Ni}_{24}\text{Pd}_3$

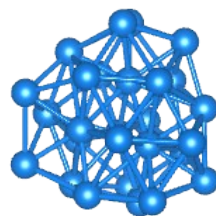

$\text{Ni}_{27}$
