# Supplementary figures and images for: Data-driven stabilization of NimPdn–m nanoalloys: a study using density functional theory and data mining approaches
Source: Royal Society of Chemistry journal article supplement (doi:10.1039/d4cp00672k), 2024-01-01

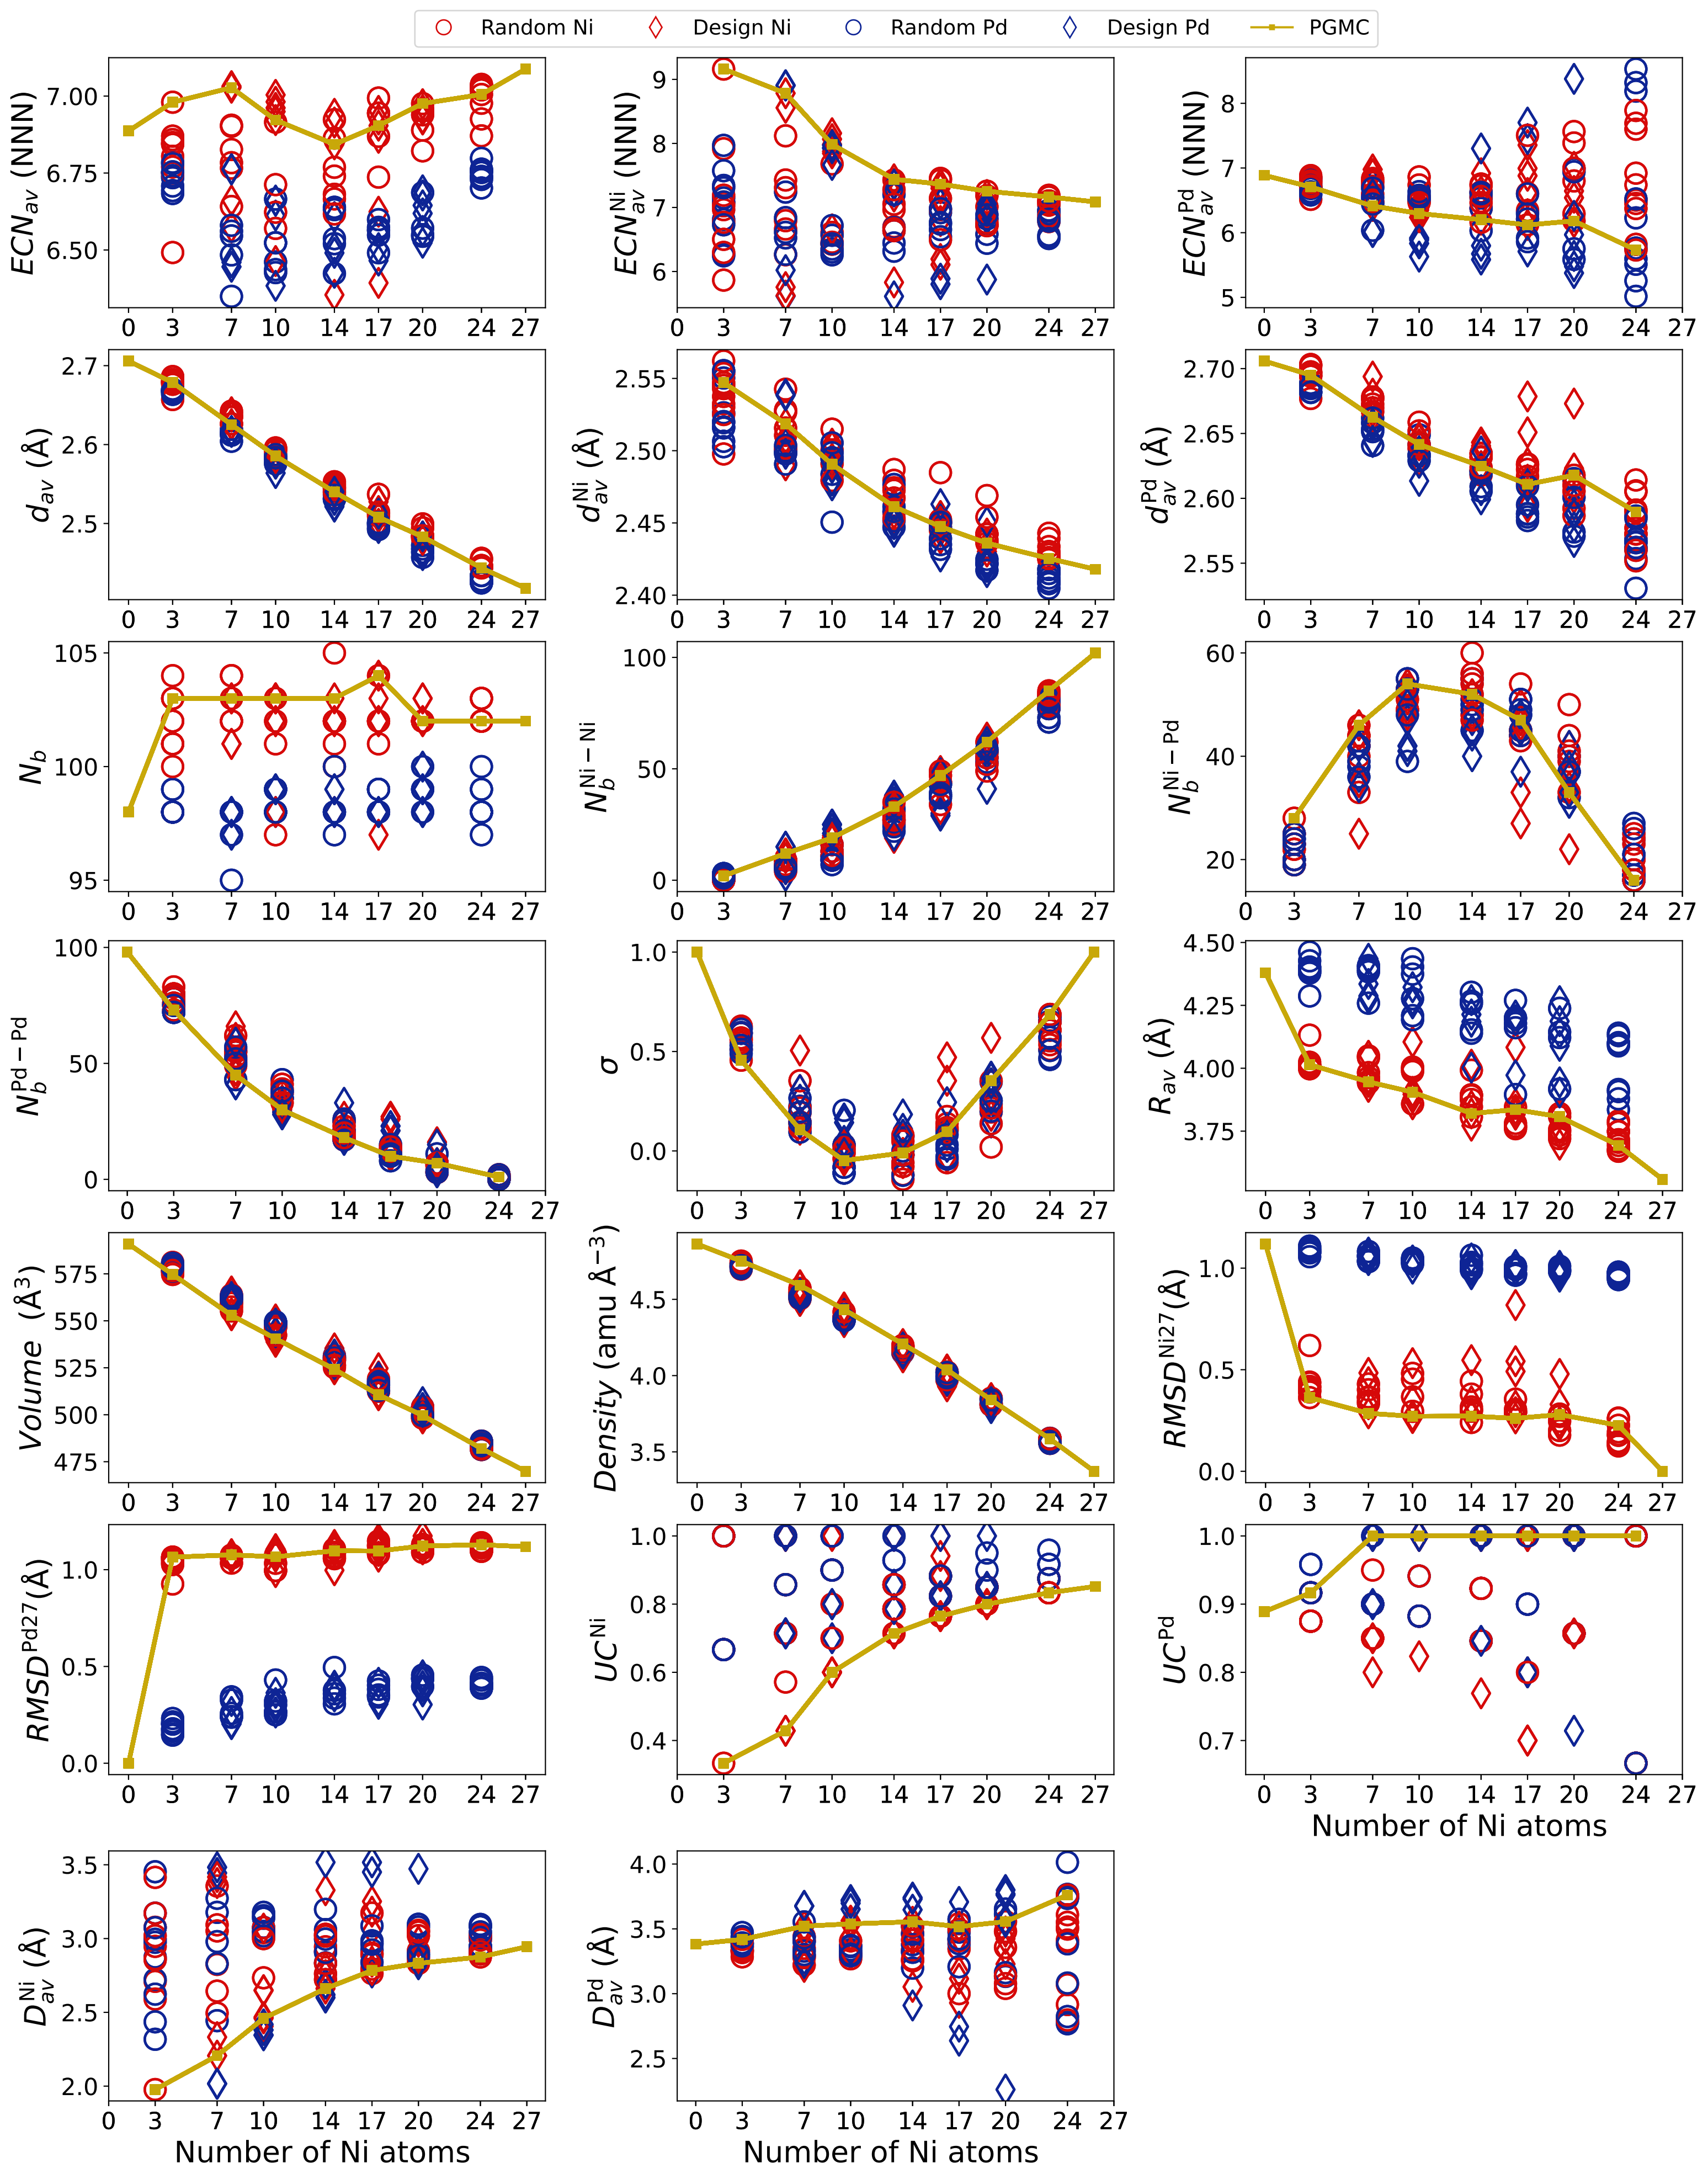

Supplement: d4cp00672k1.zip [file d4cp00672k1.zip]

a

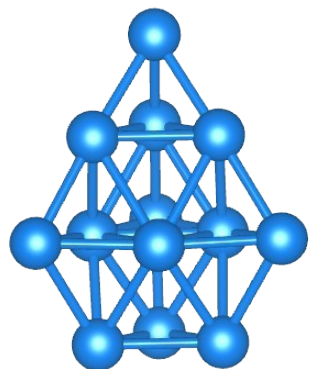

0

b

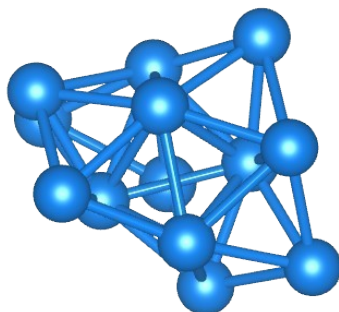

143

c

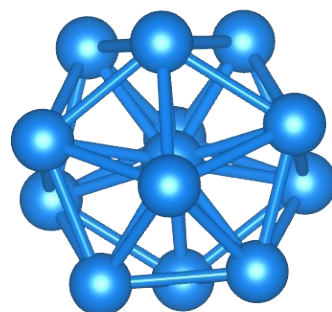

405

d

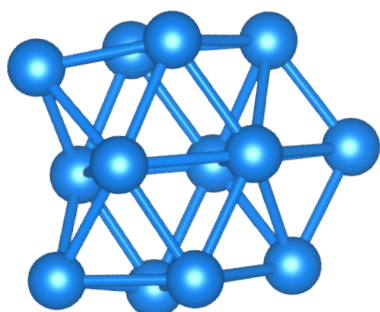

447

e

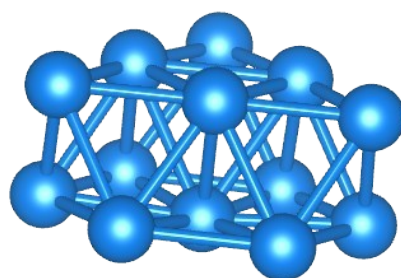

550

f

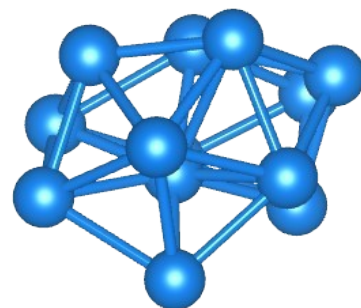

663

g

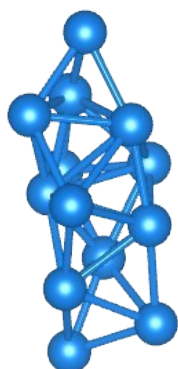

979

h

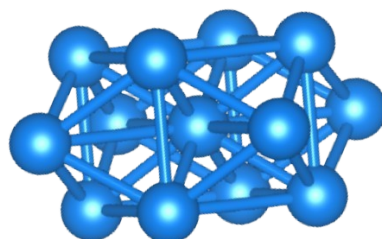

1270

i

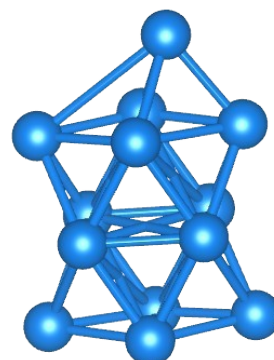

1271

j

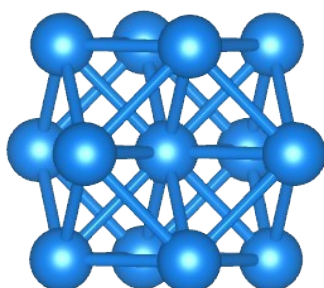

1589

Supplement: d4cp00672k1.zip [file d4cp00672k1.zip]

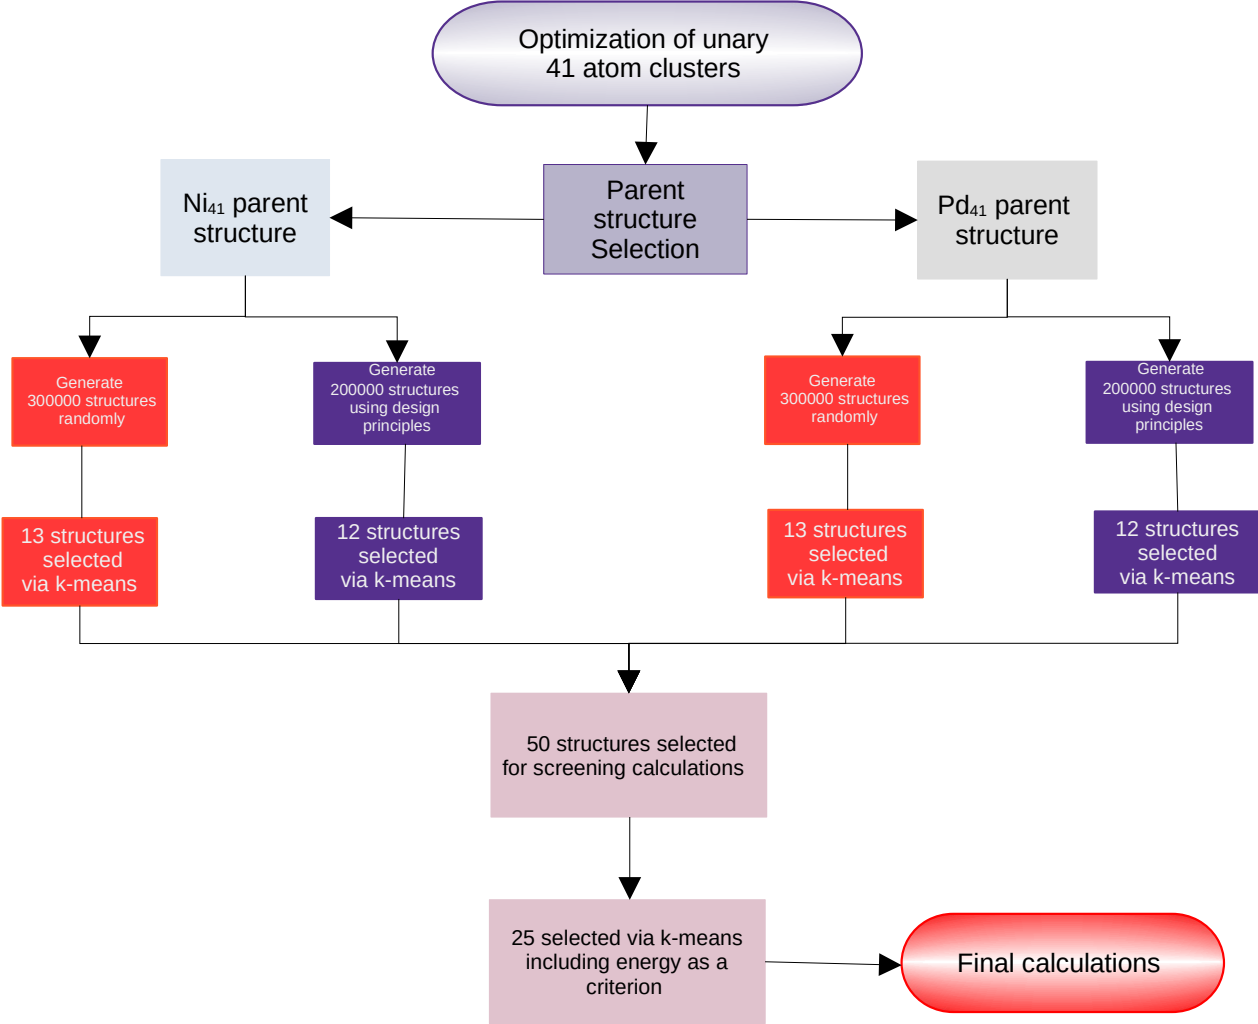

Supplement: d4cp00672k1.zip [file d4cp00672k1.zip]

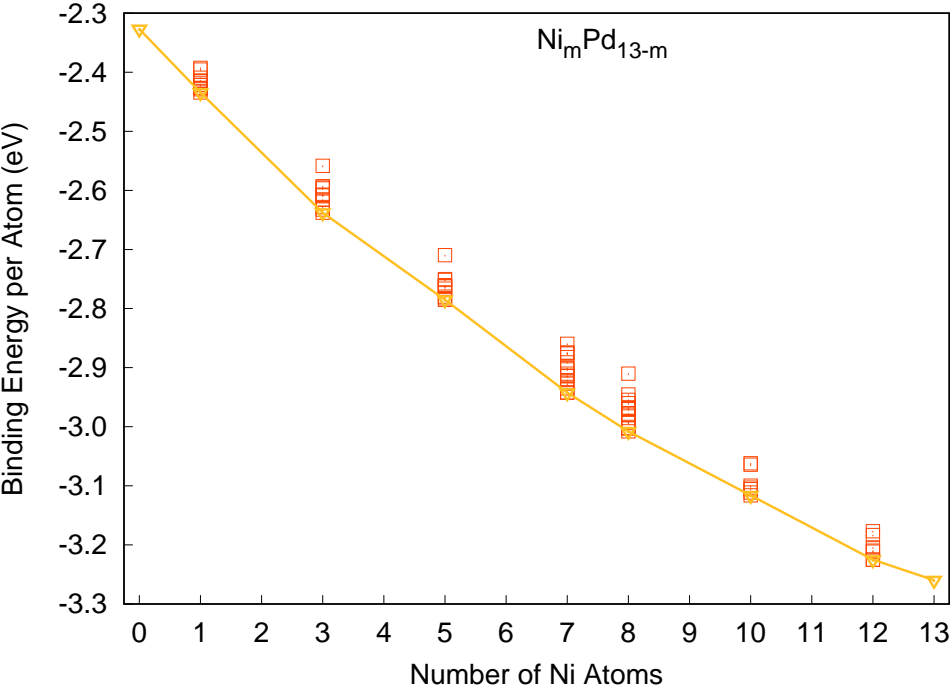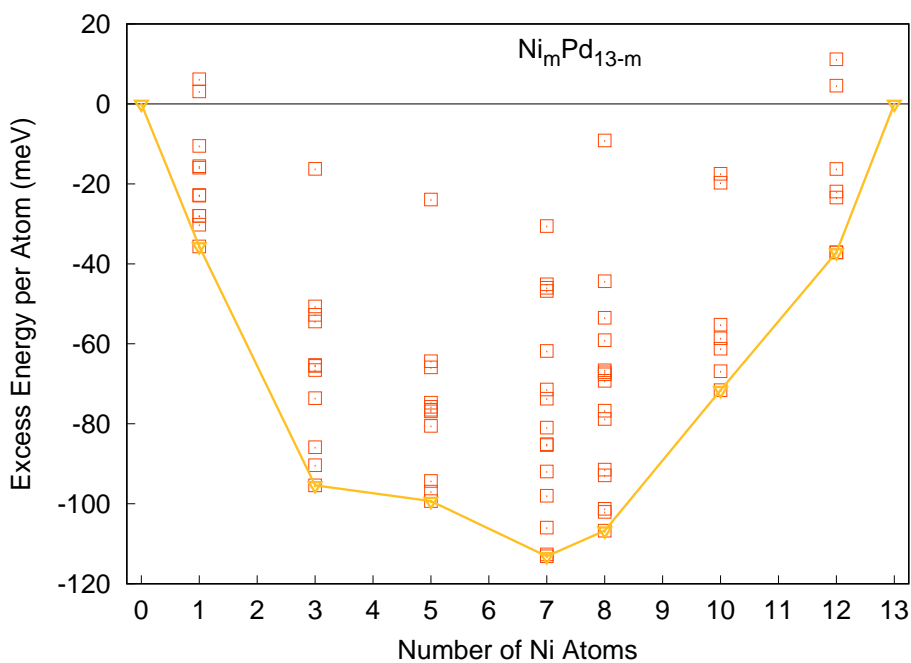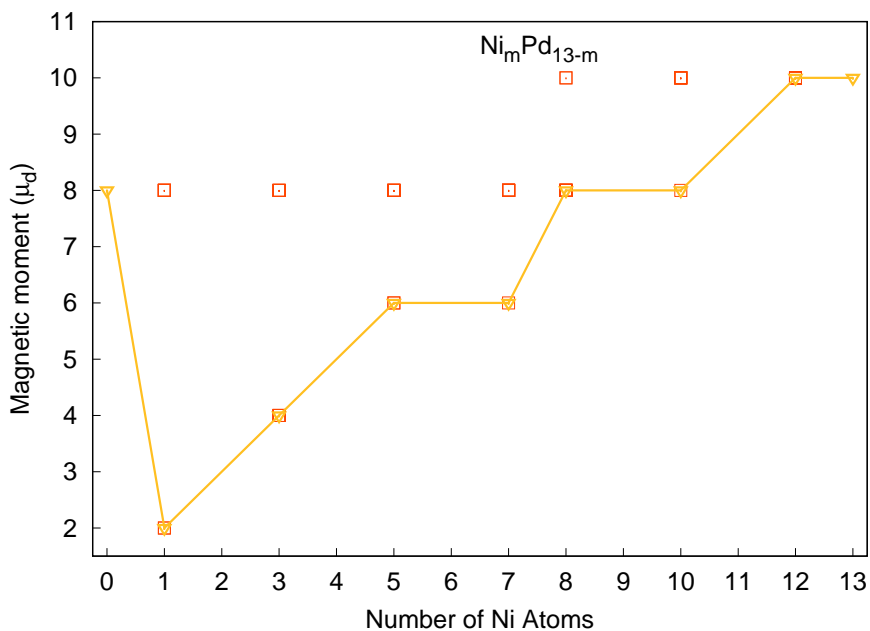

Supplement: d4cp00672k1.zip [file d4cp00672k1.zip]

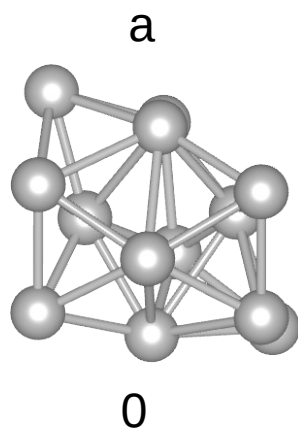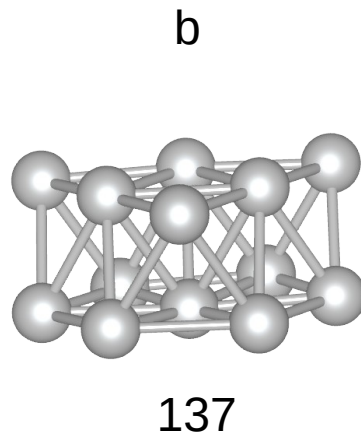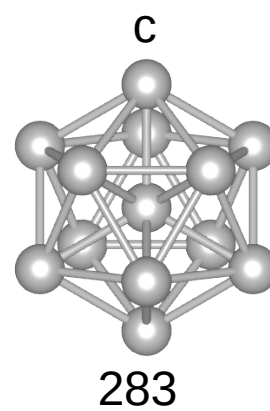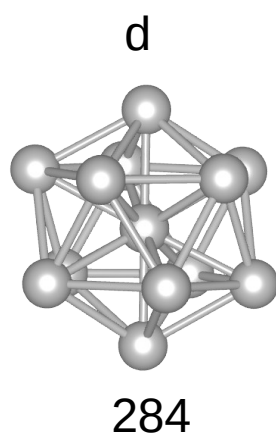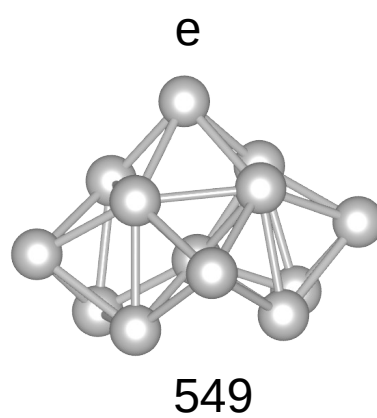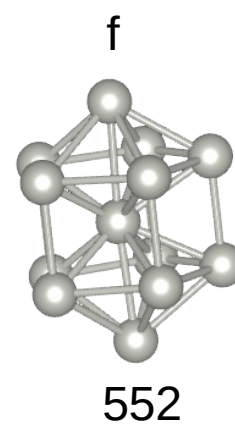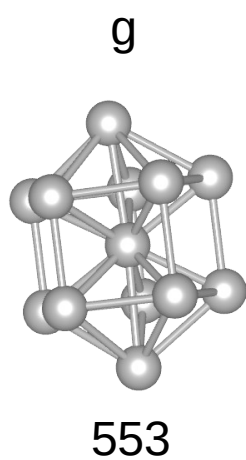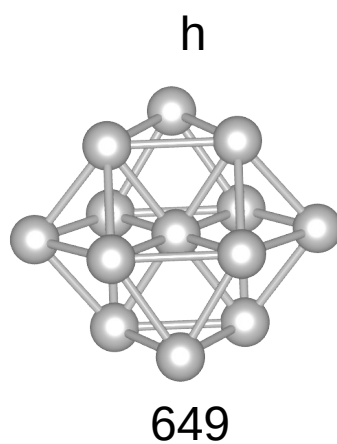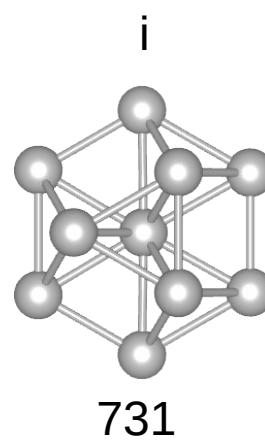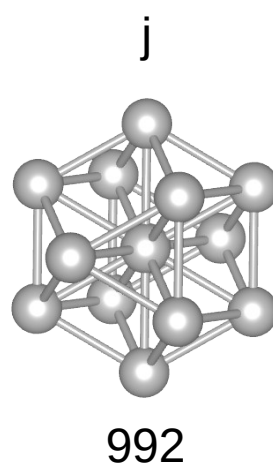

Supplement: d4cp00672k1.zip [file d4cp00672k1.zip]

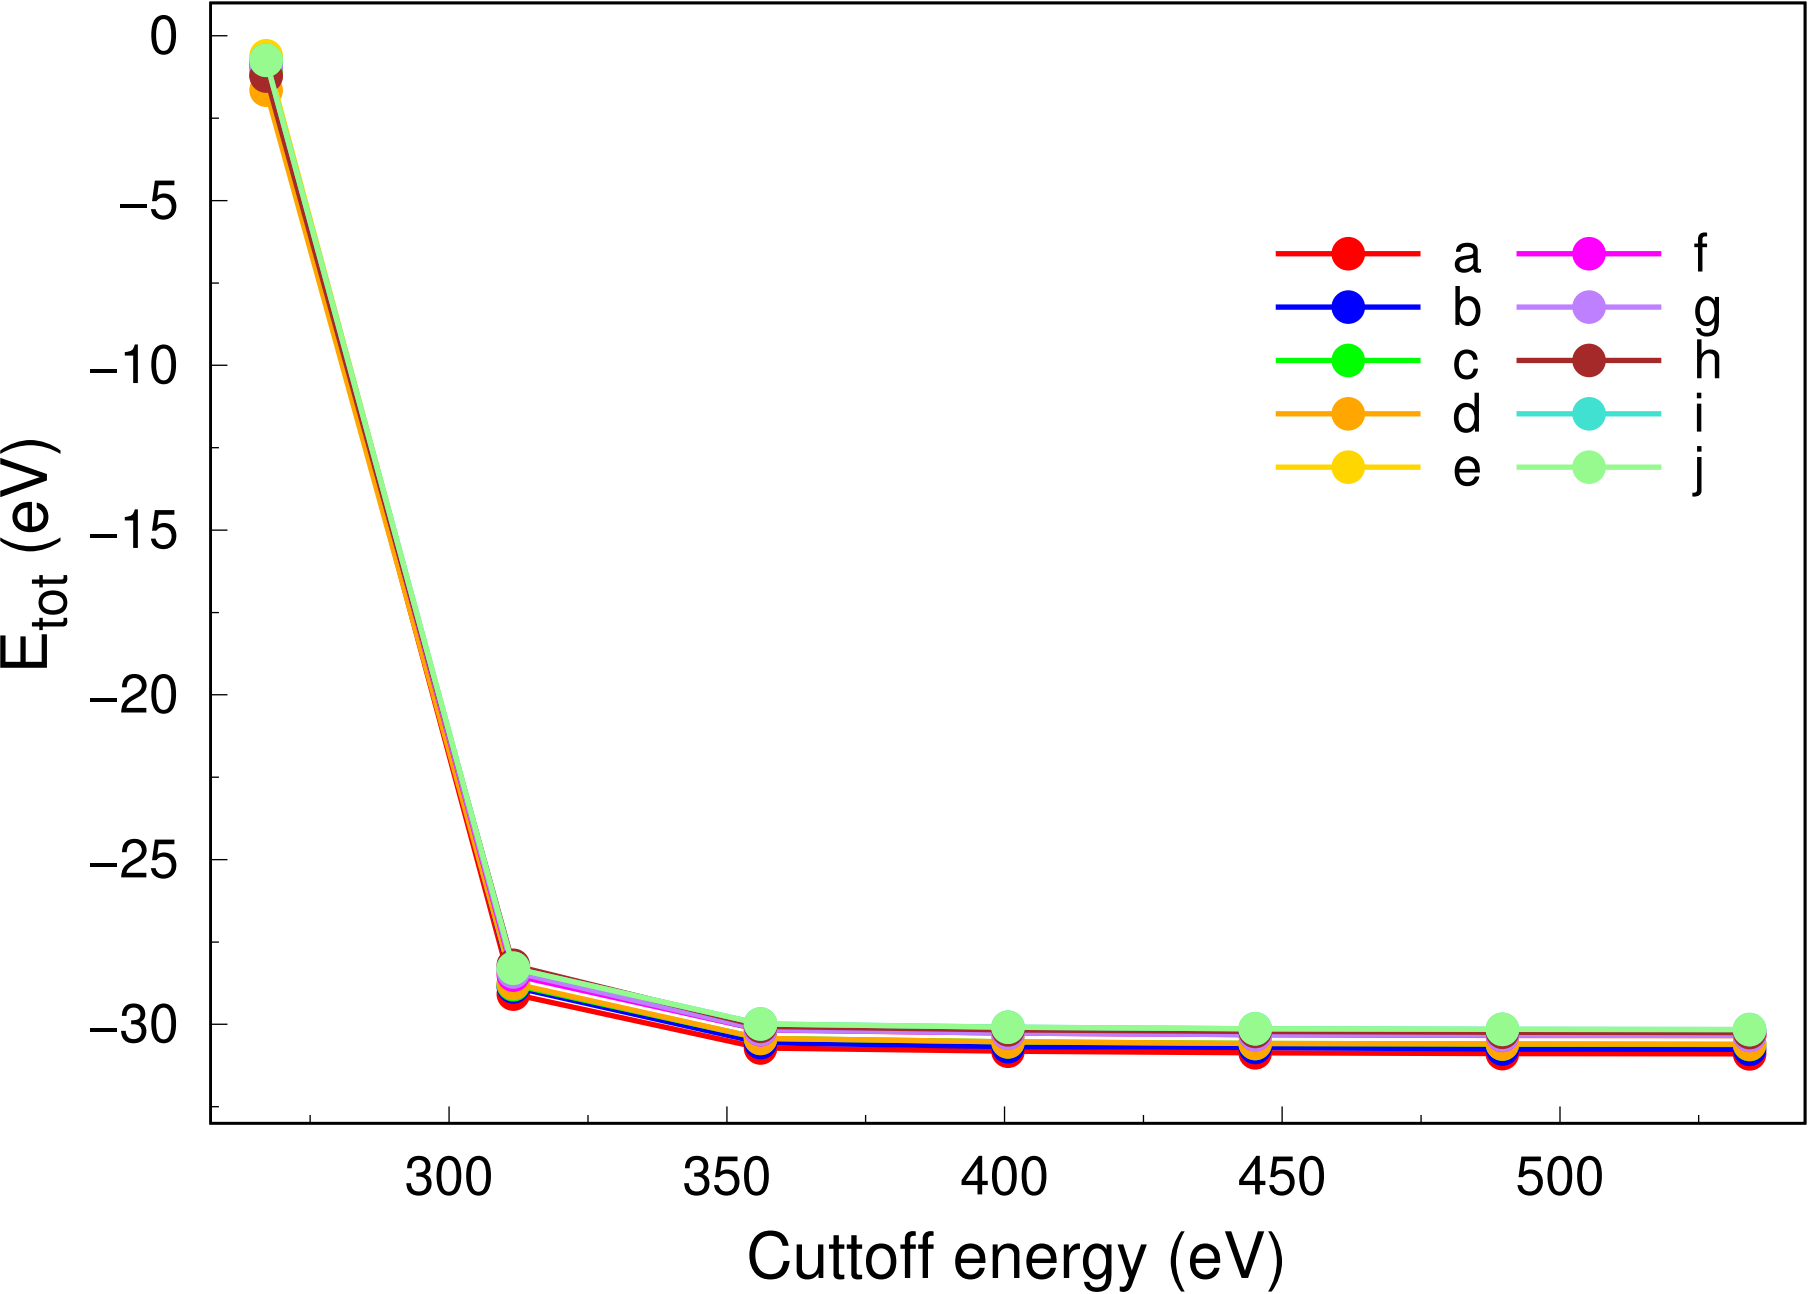

Supplement: d4cp00672k1.zip [file d4cp00672k1.zip]

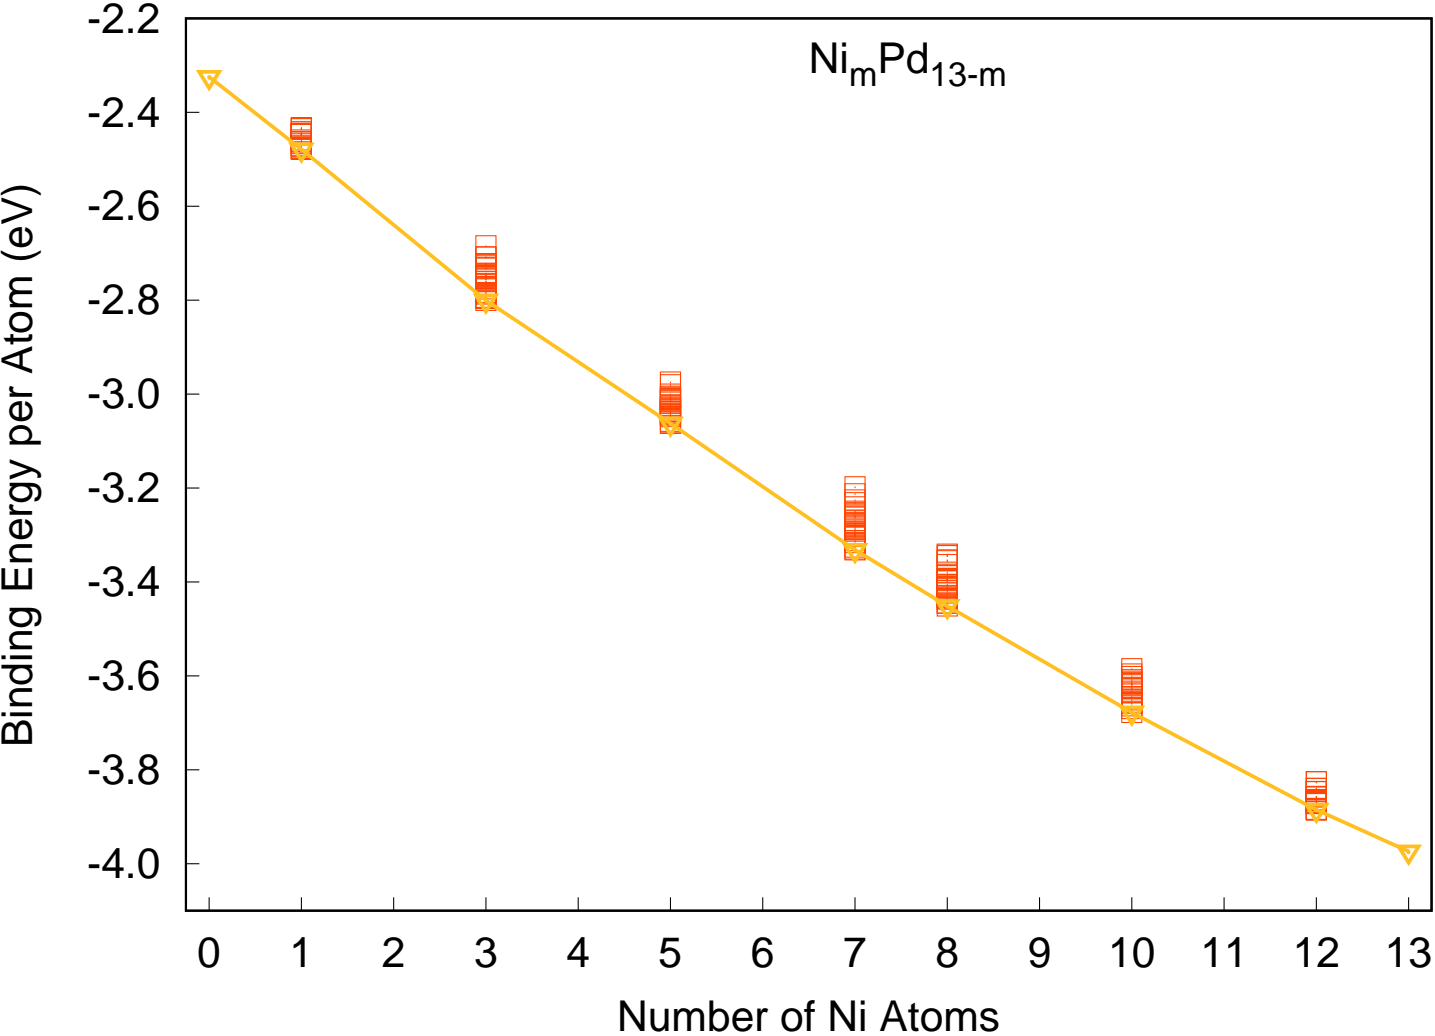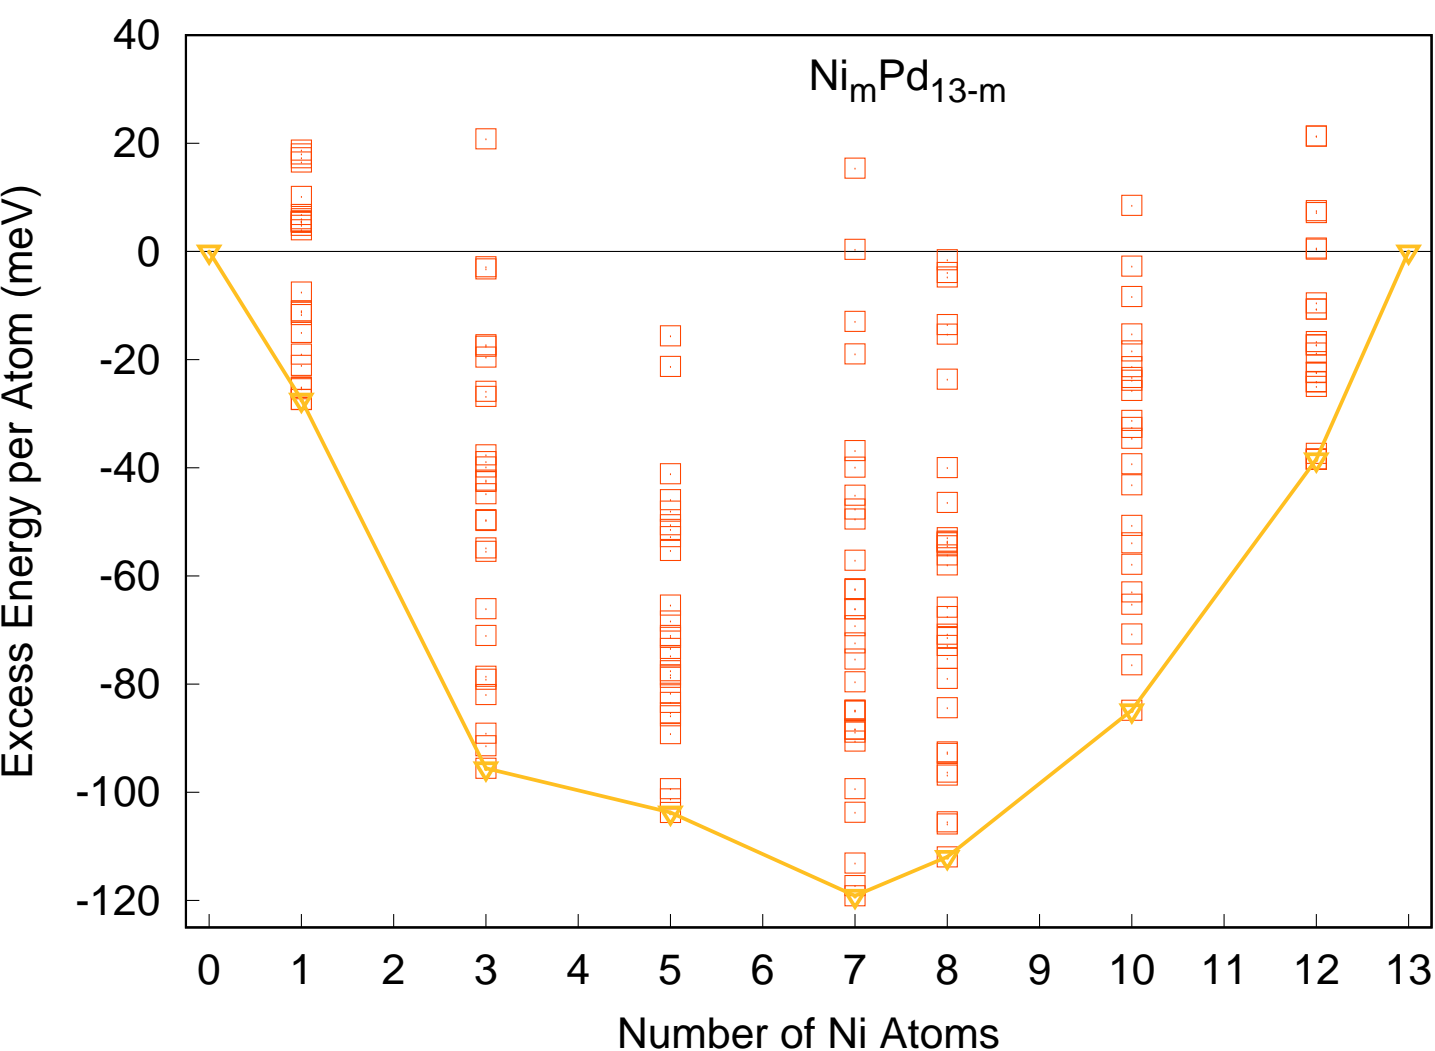

Supplement: d4cp00672k1.zip [file d4cp00672k1.zip]

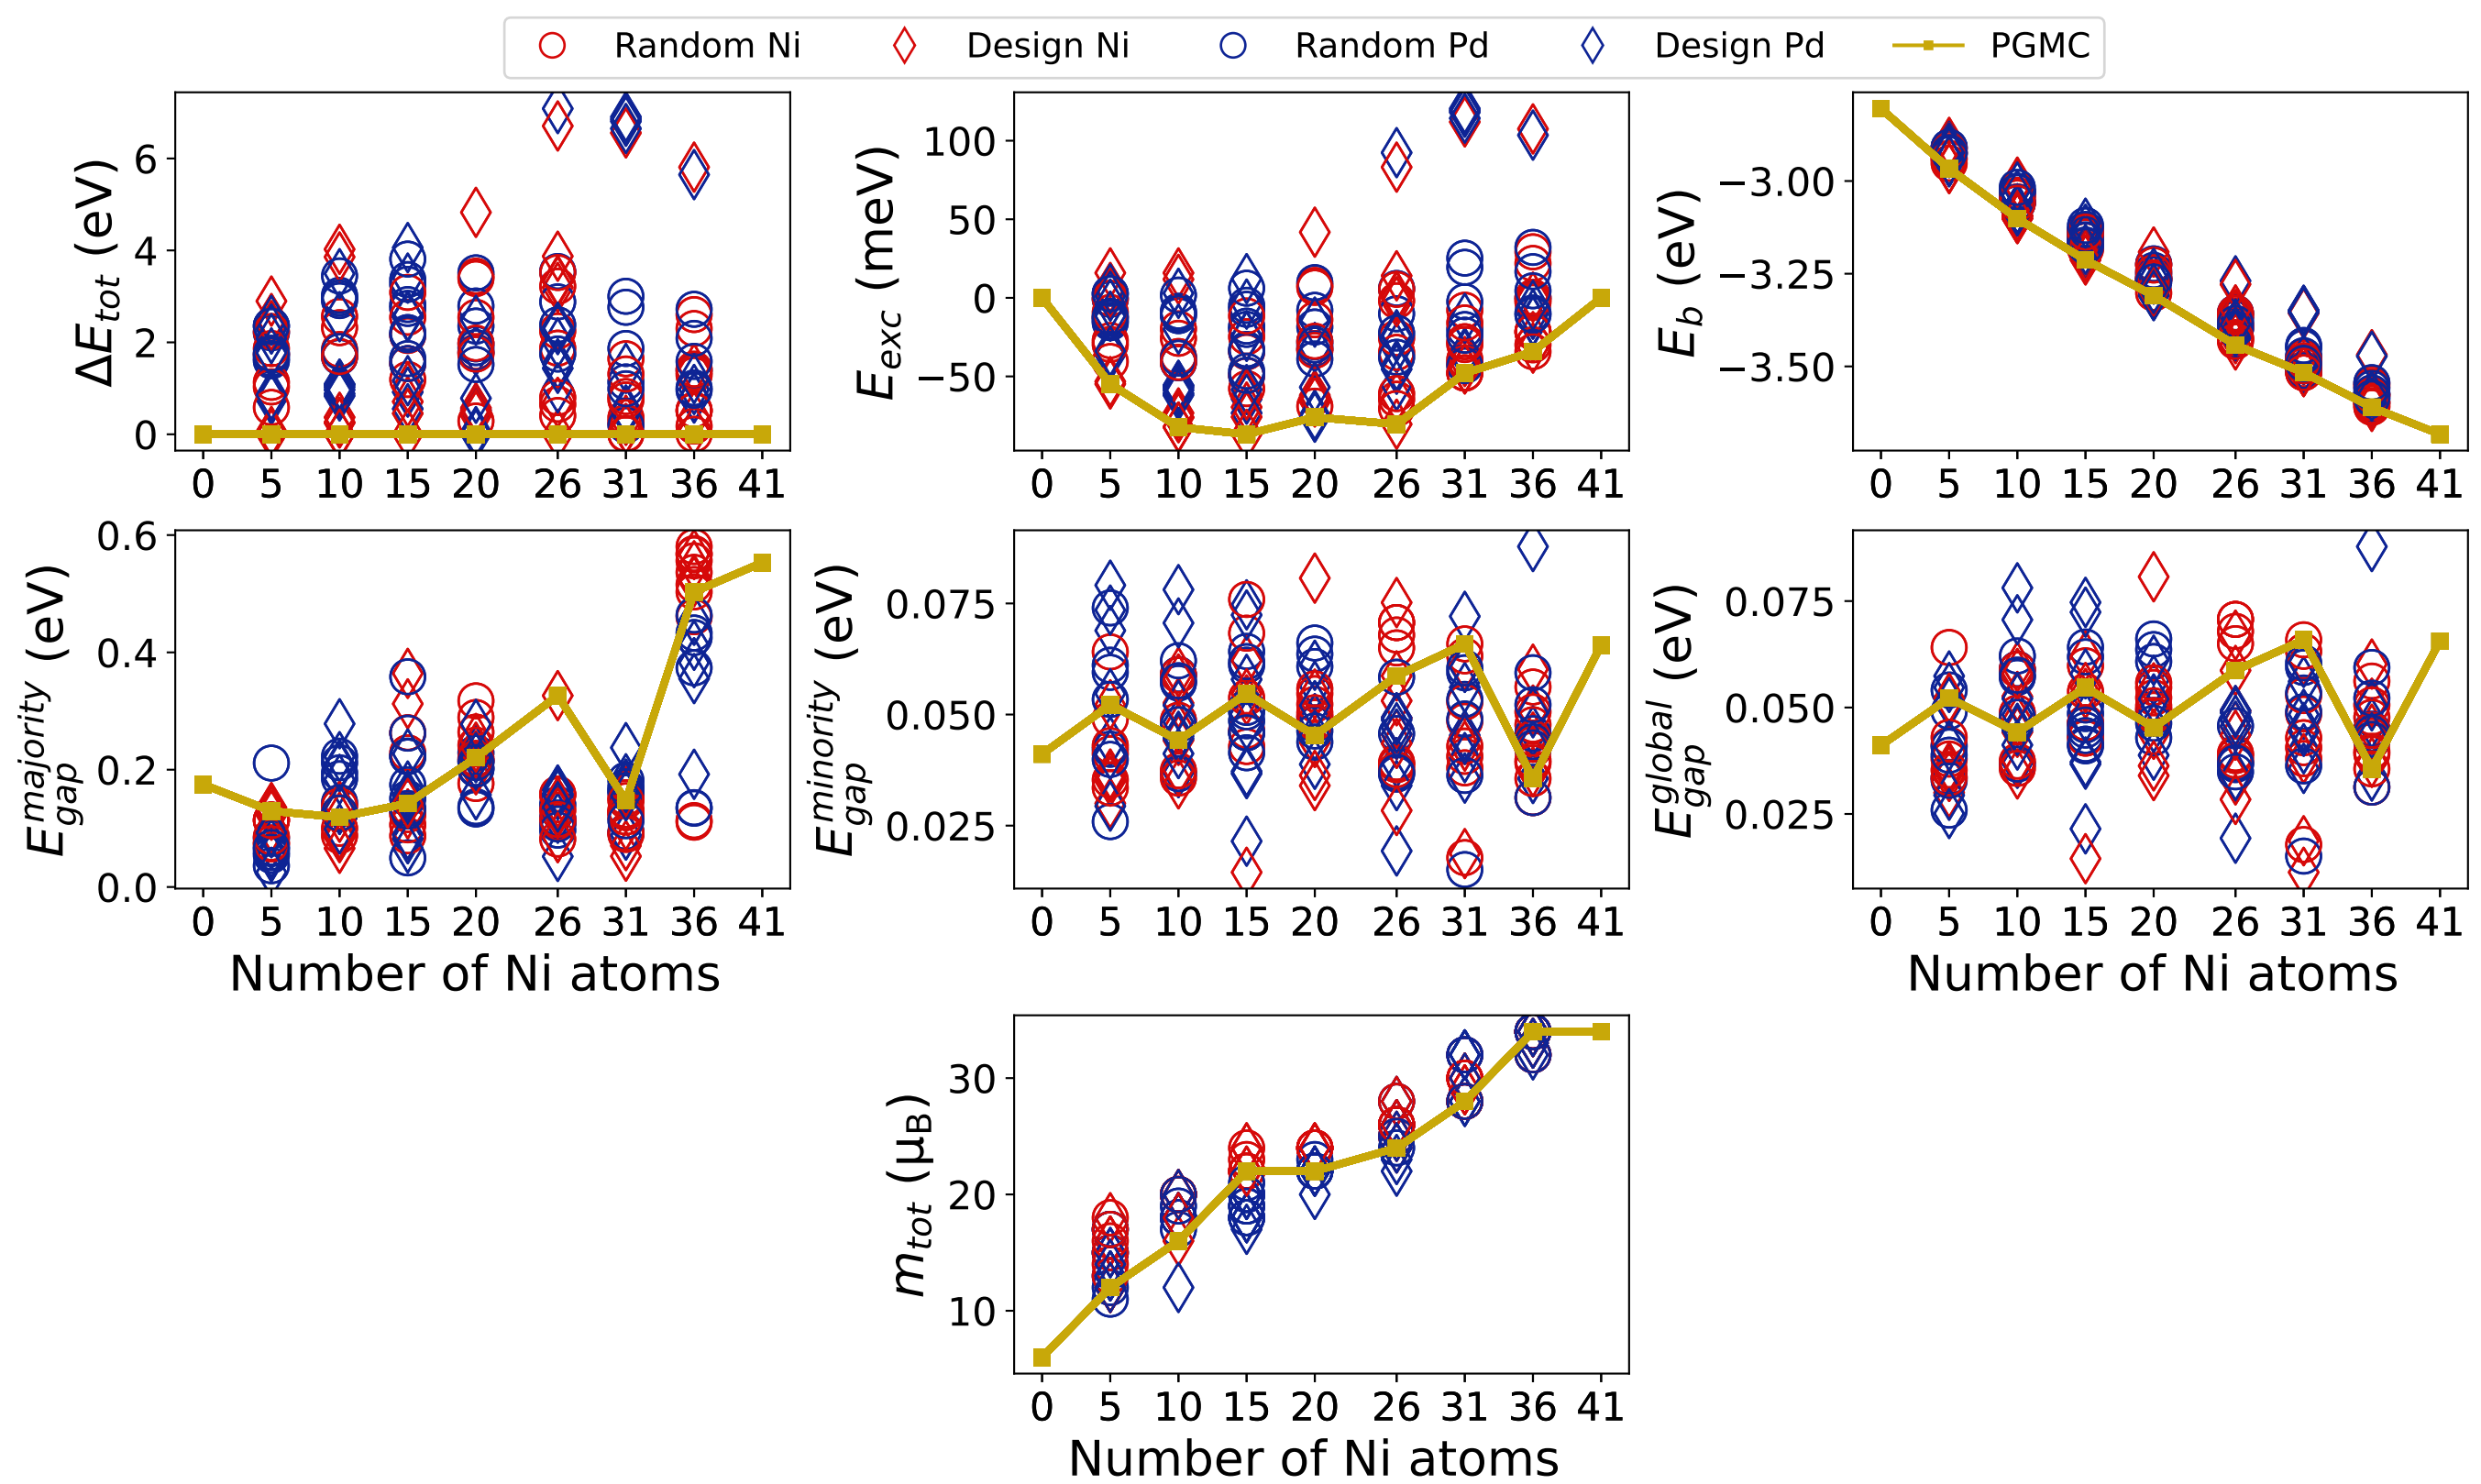

Supplement: d4cp00672k1.zip [file d4cp00672k1.zip]

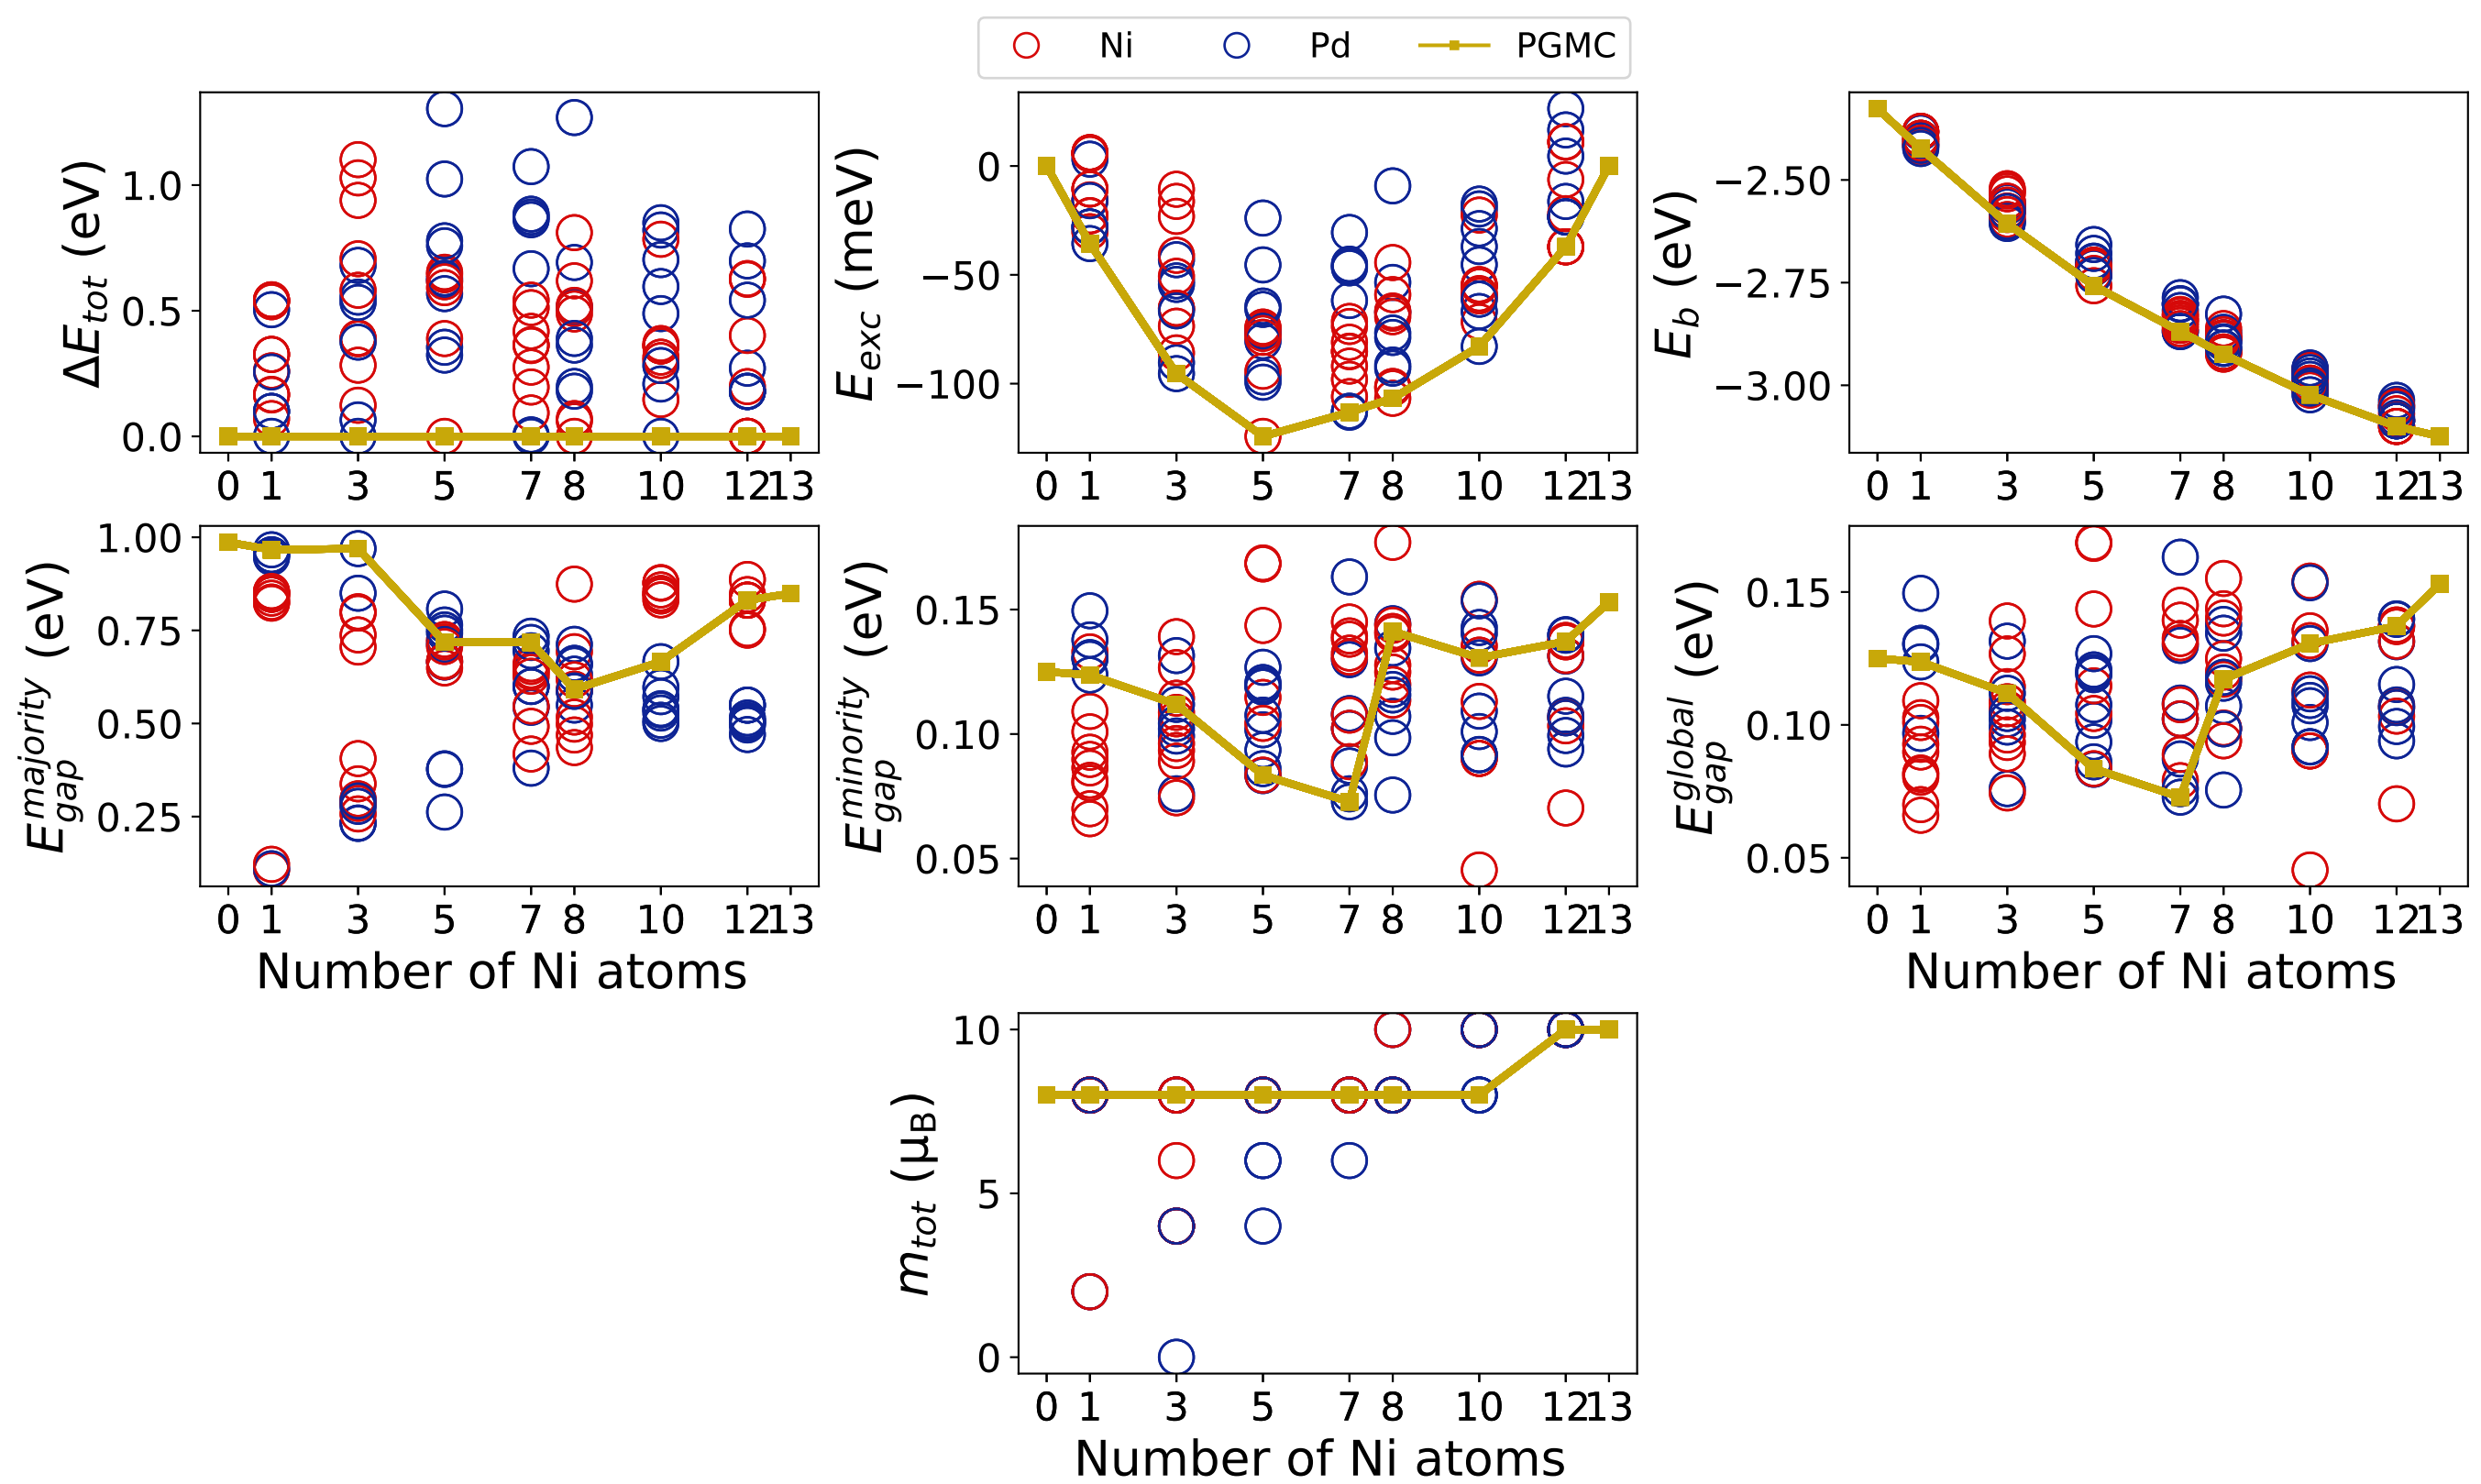

Supplement: d4cp00672k1.zip [file d4cp00672k1.zip]

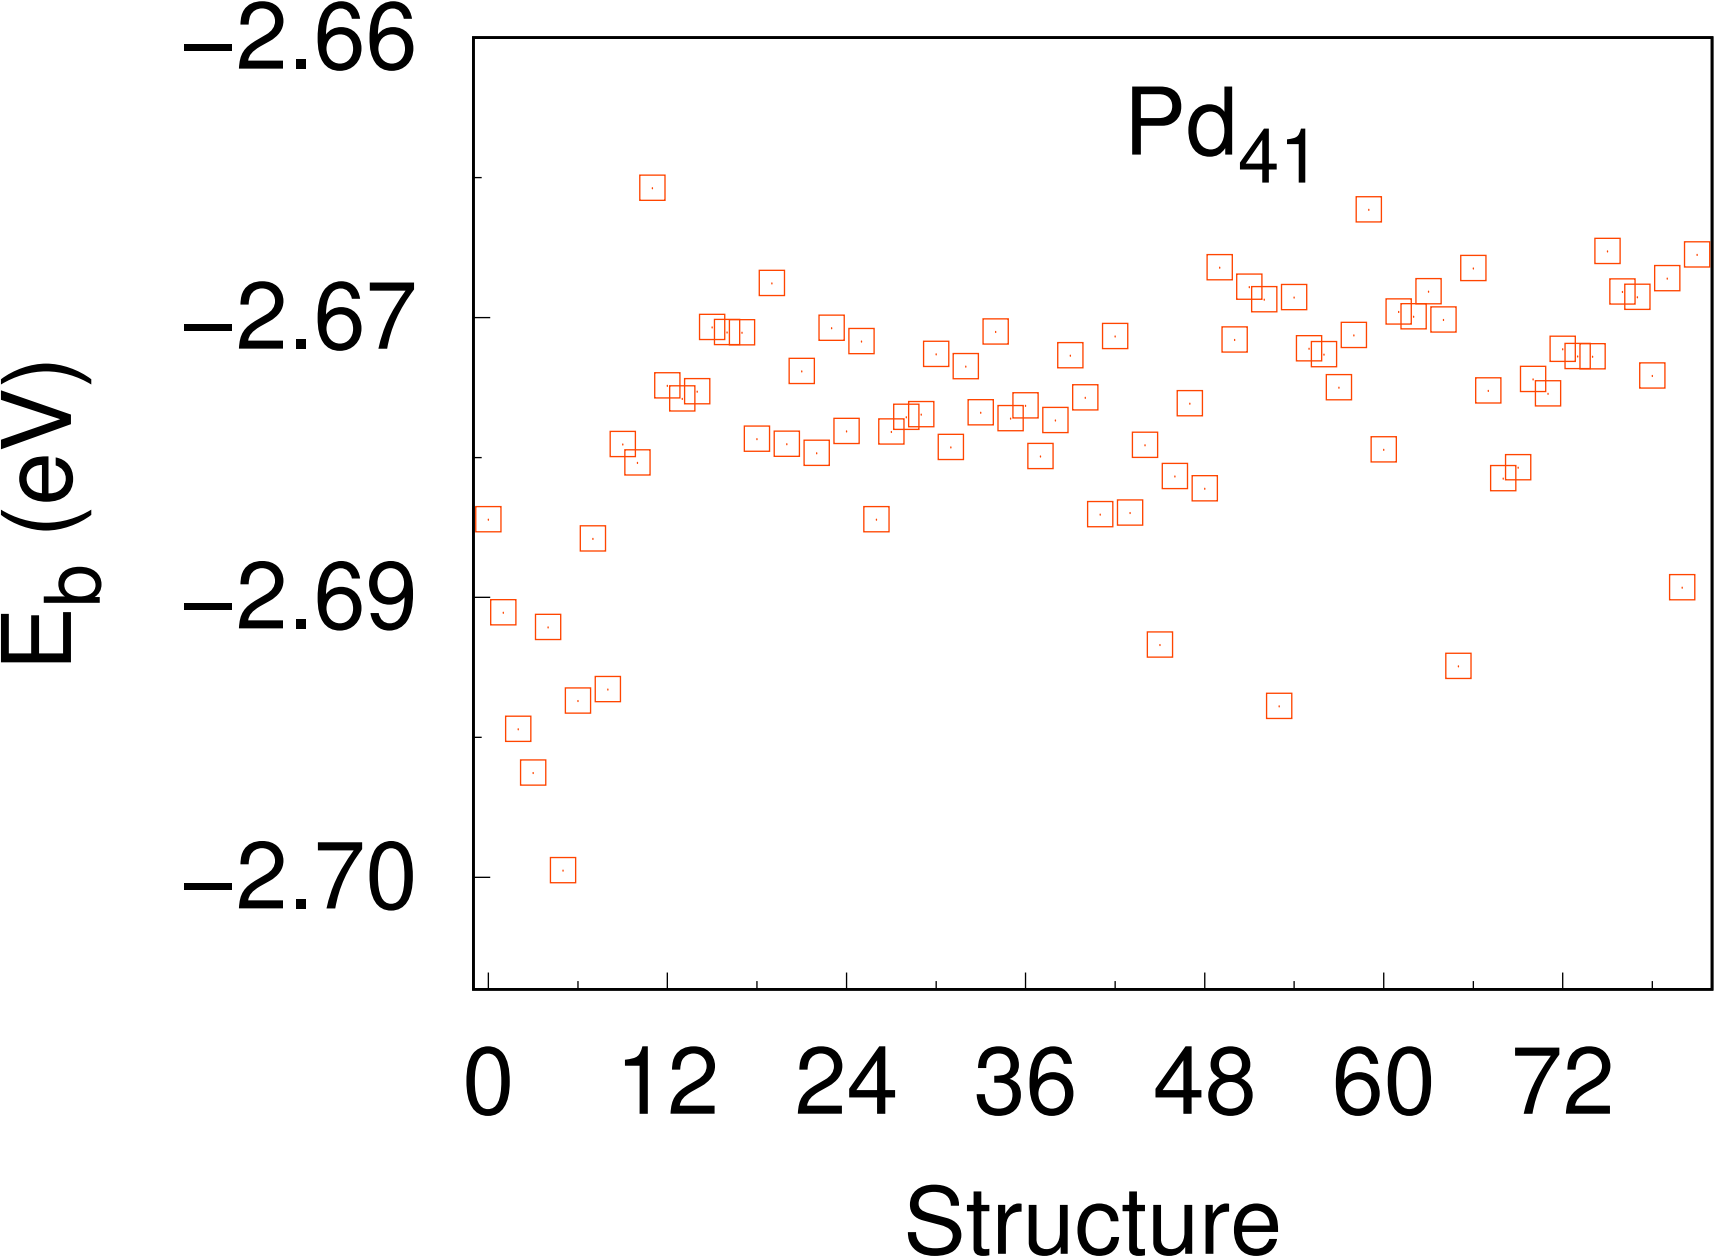

Supplement: d4cp00672k1.zip [file d4cp00672k1.zip]

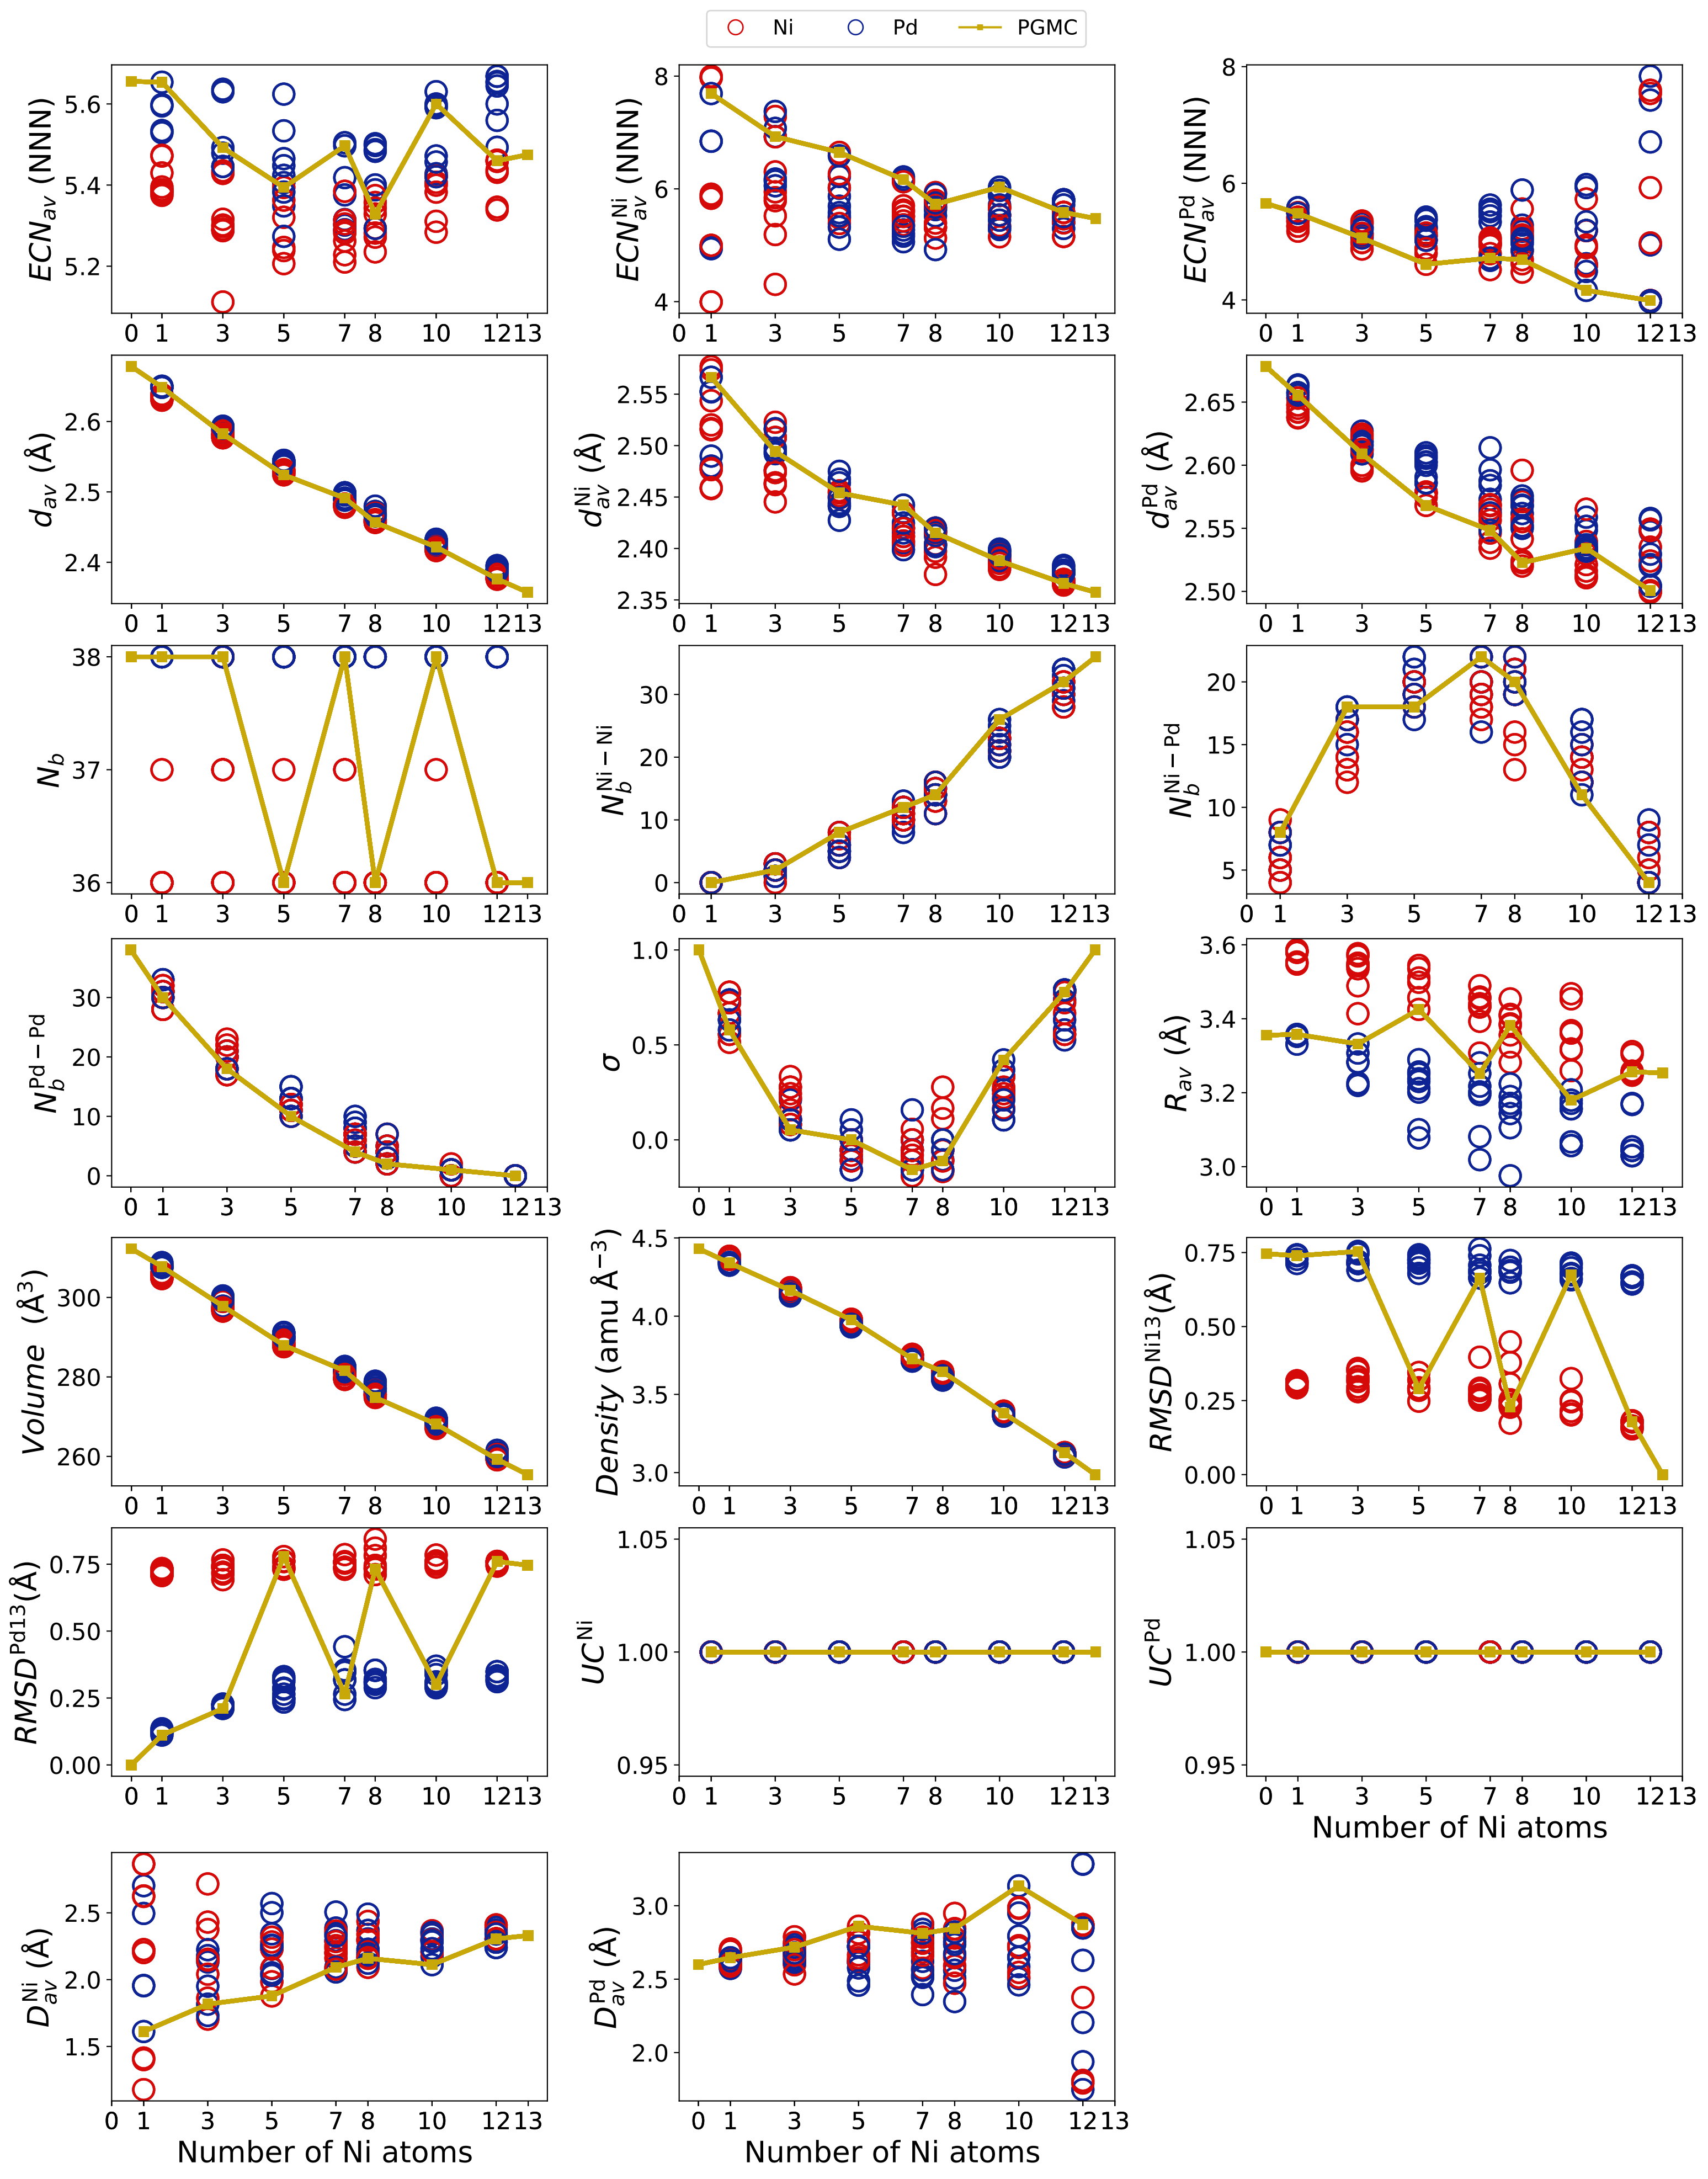

Supplement: d4cp00672k1.zip [file d4cp00672k1.zip]

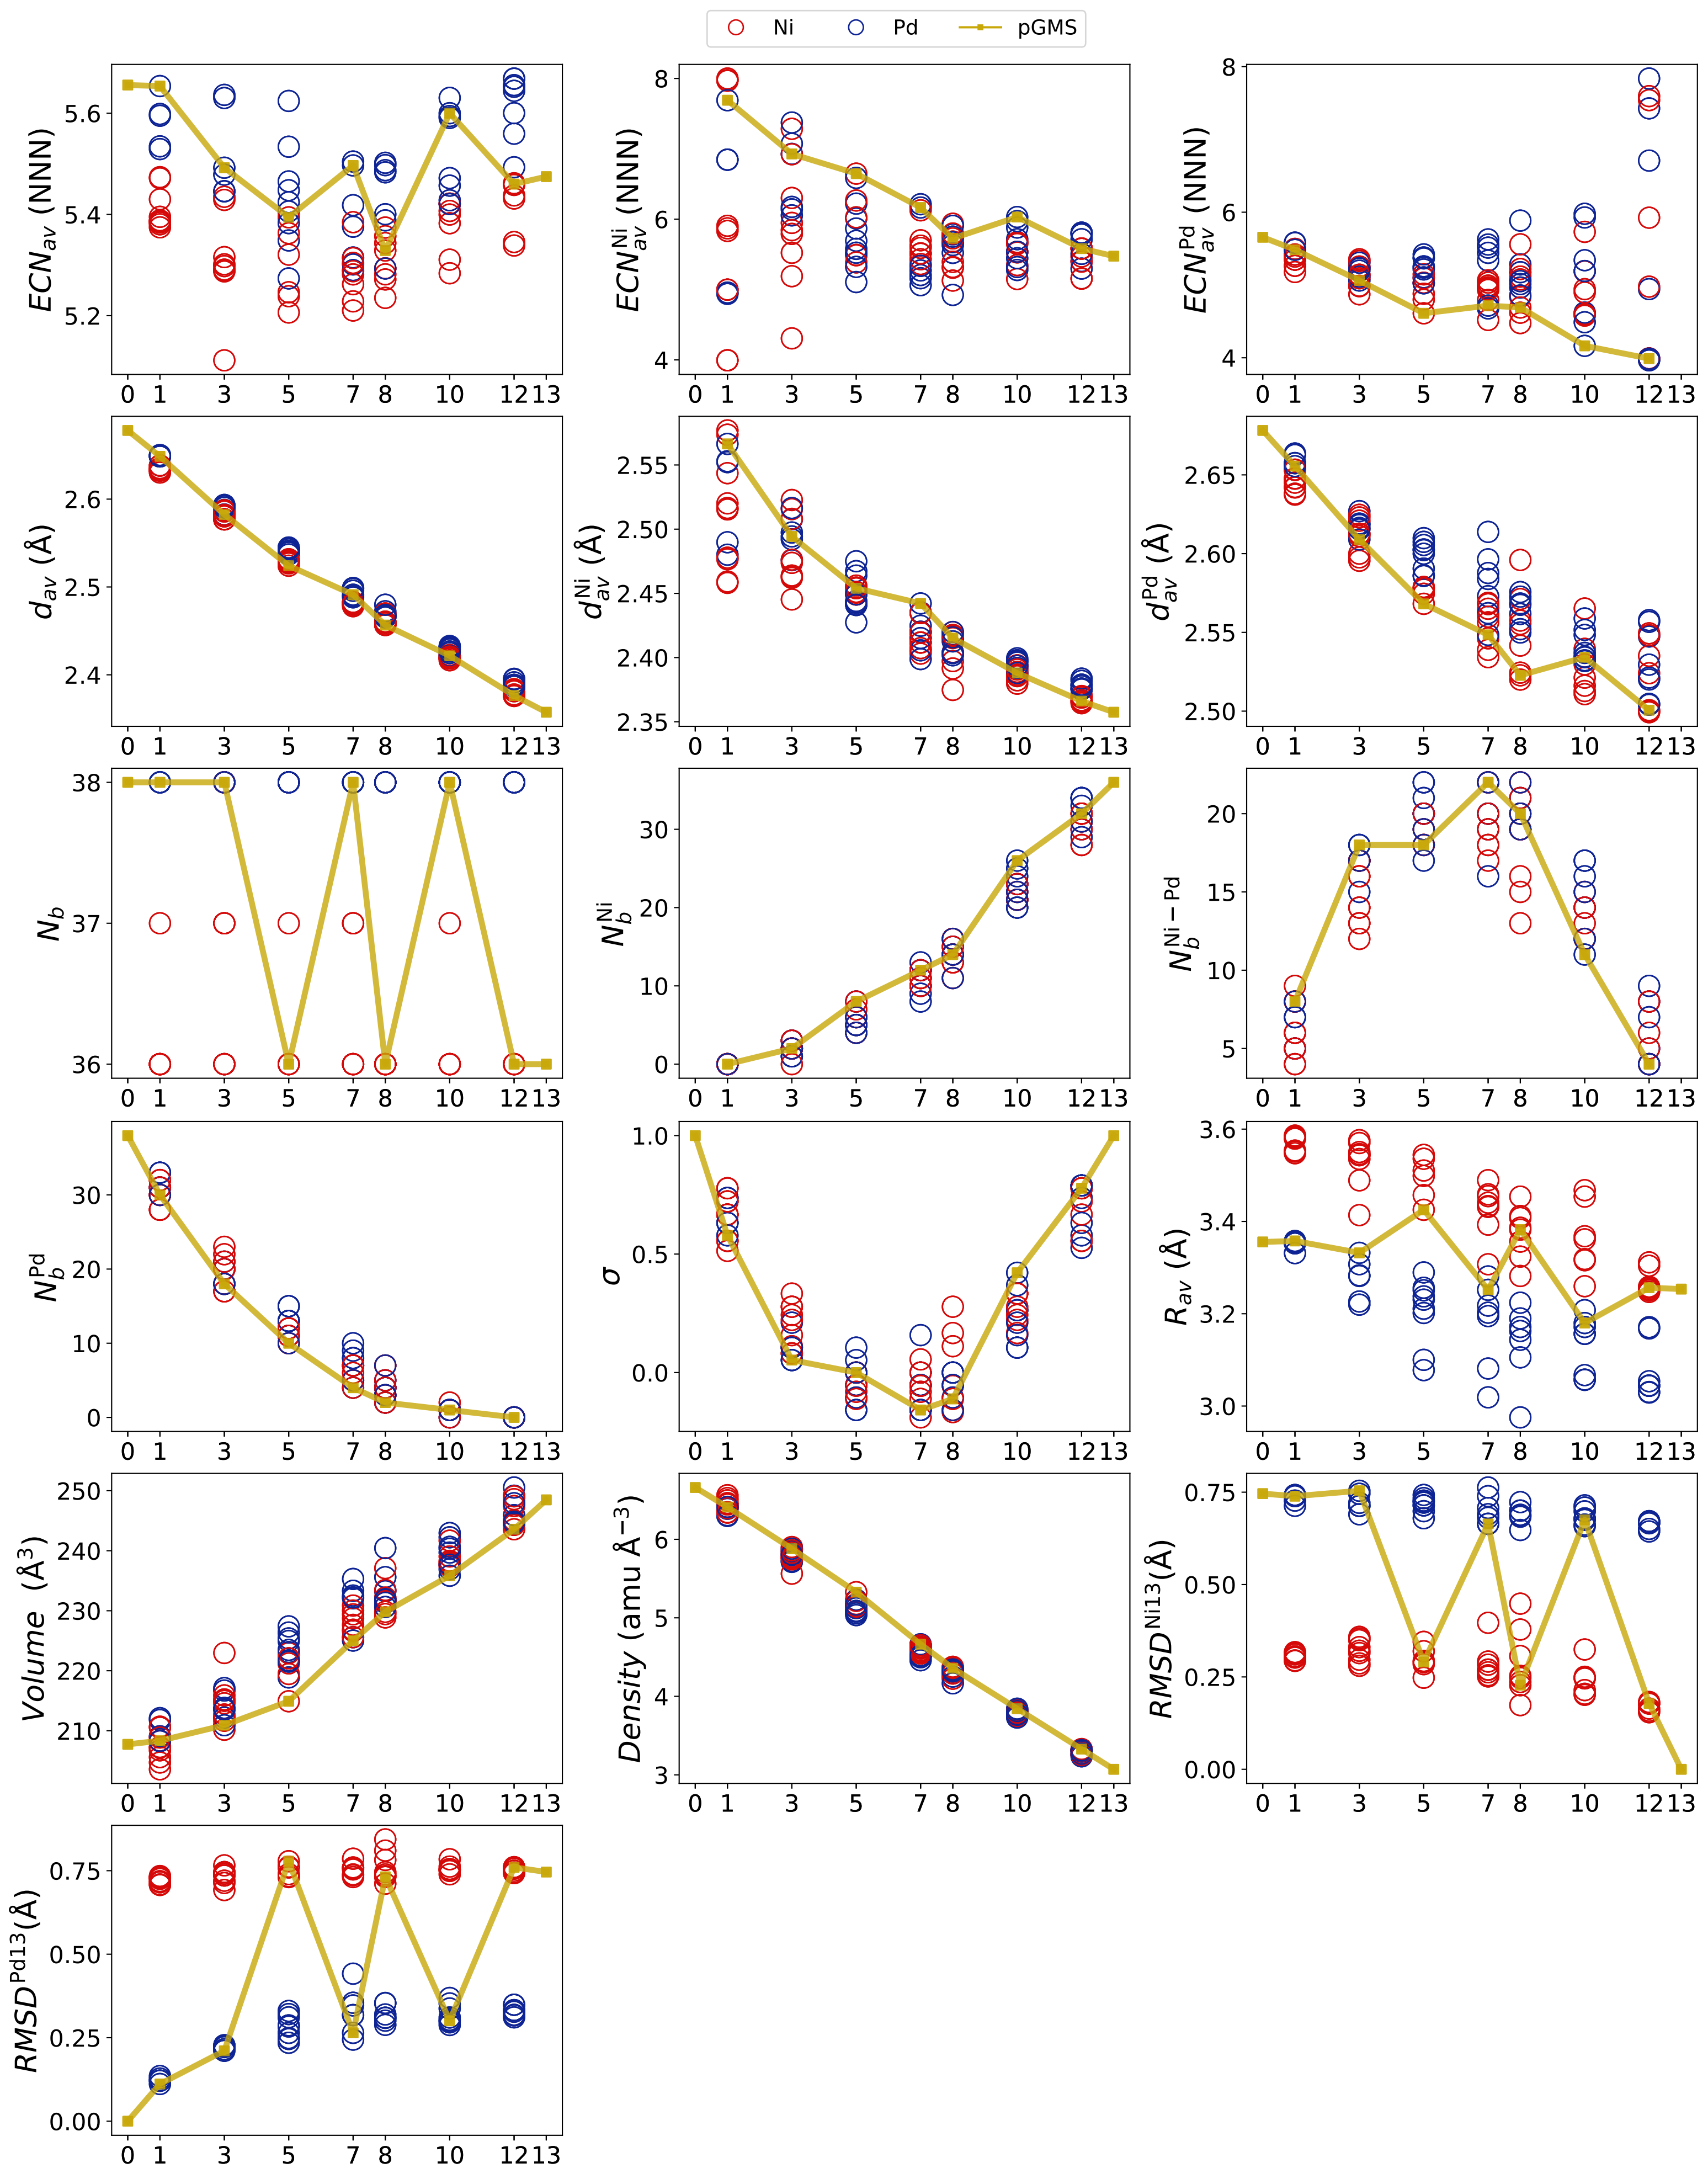

Supplement: d4cp00672k1.zip [file d4cp00672k1.zip]

Density of States (States/eV)

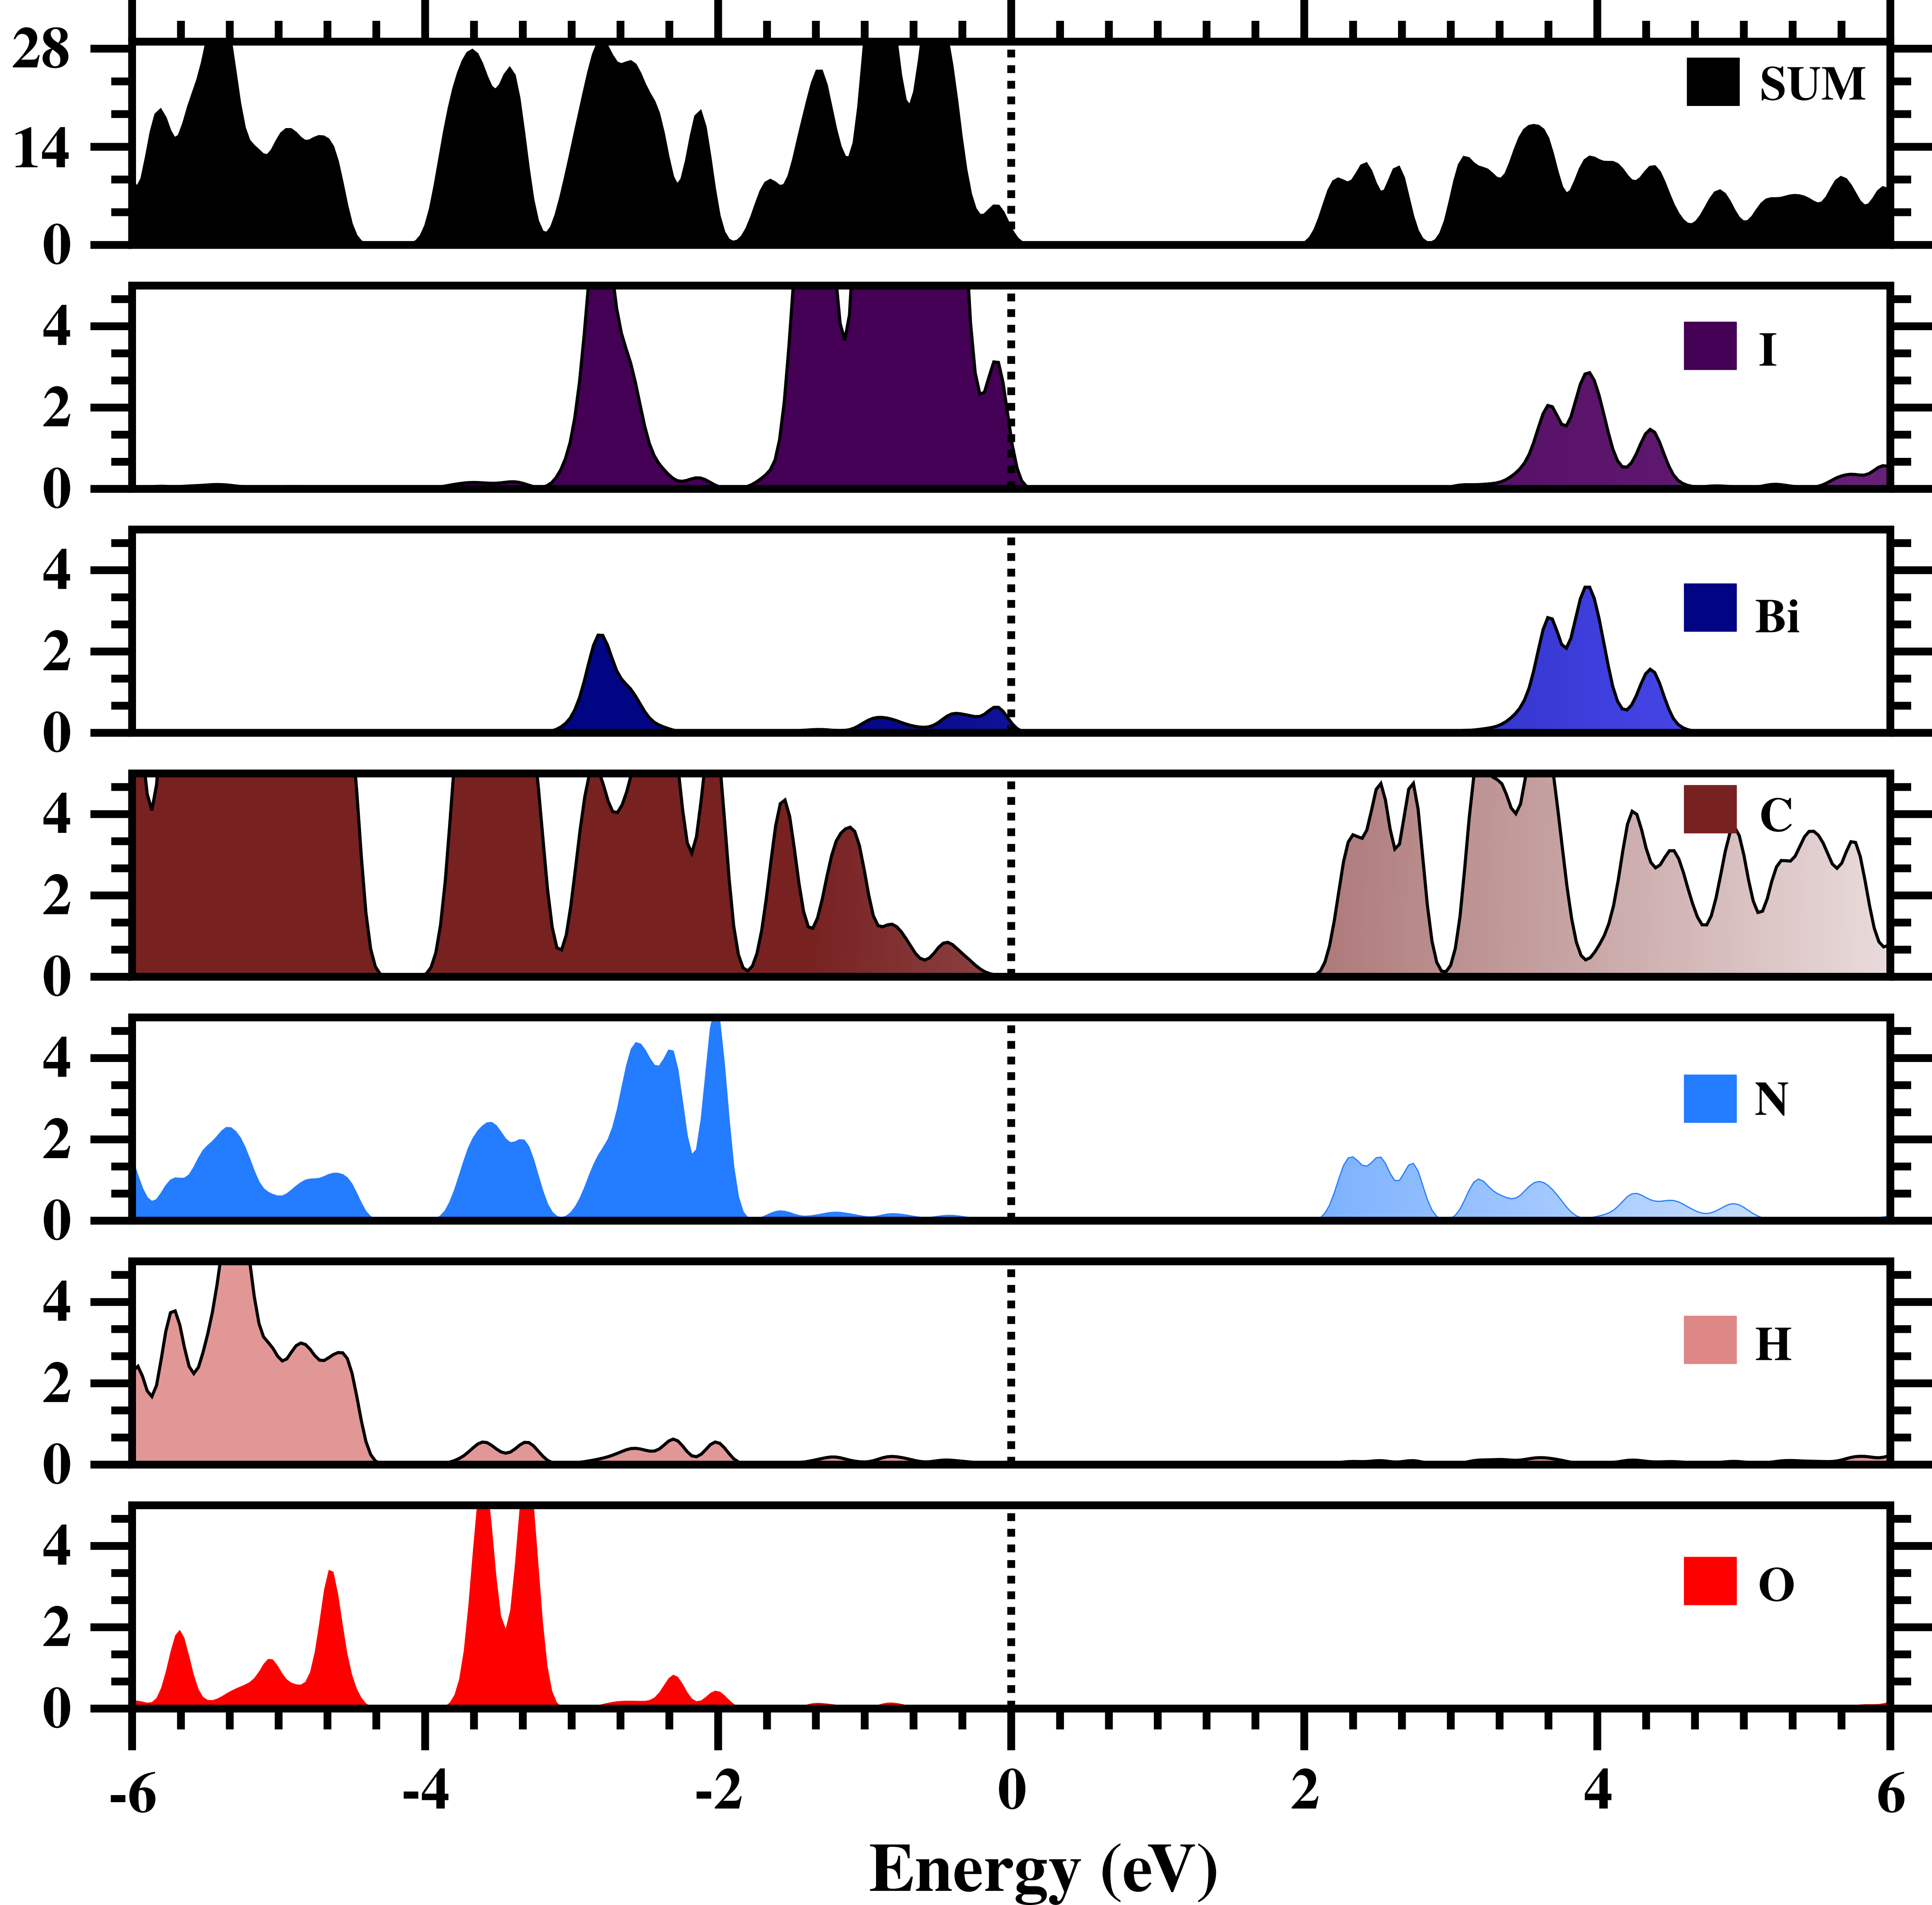

Supplement: d4cp00672k1.zip [file d4cp00672k1.zip]

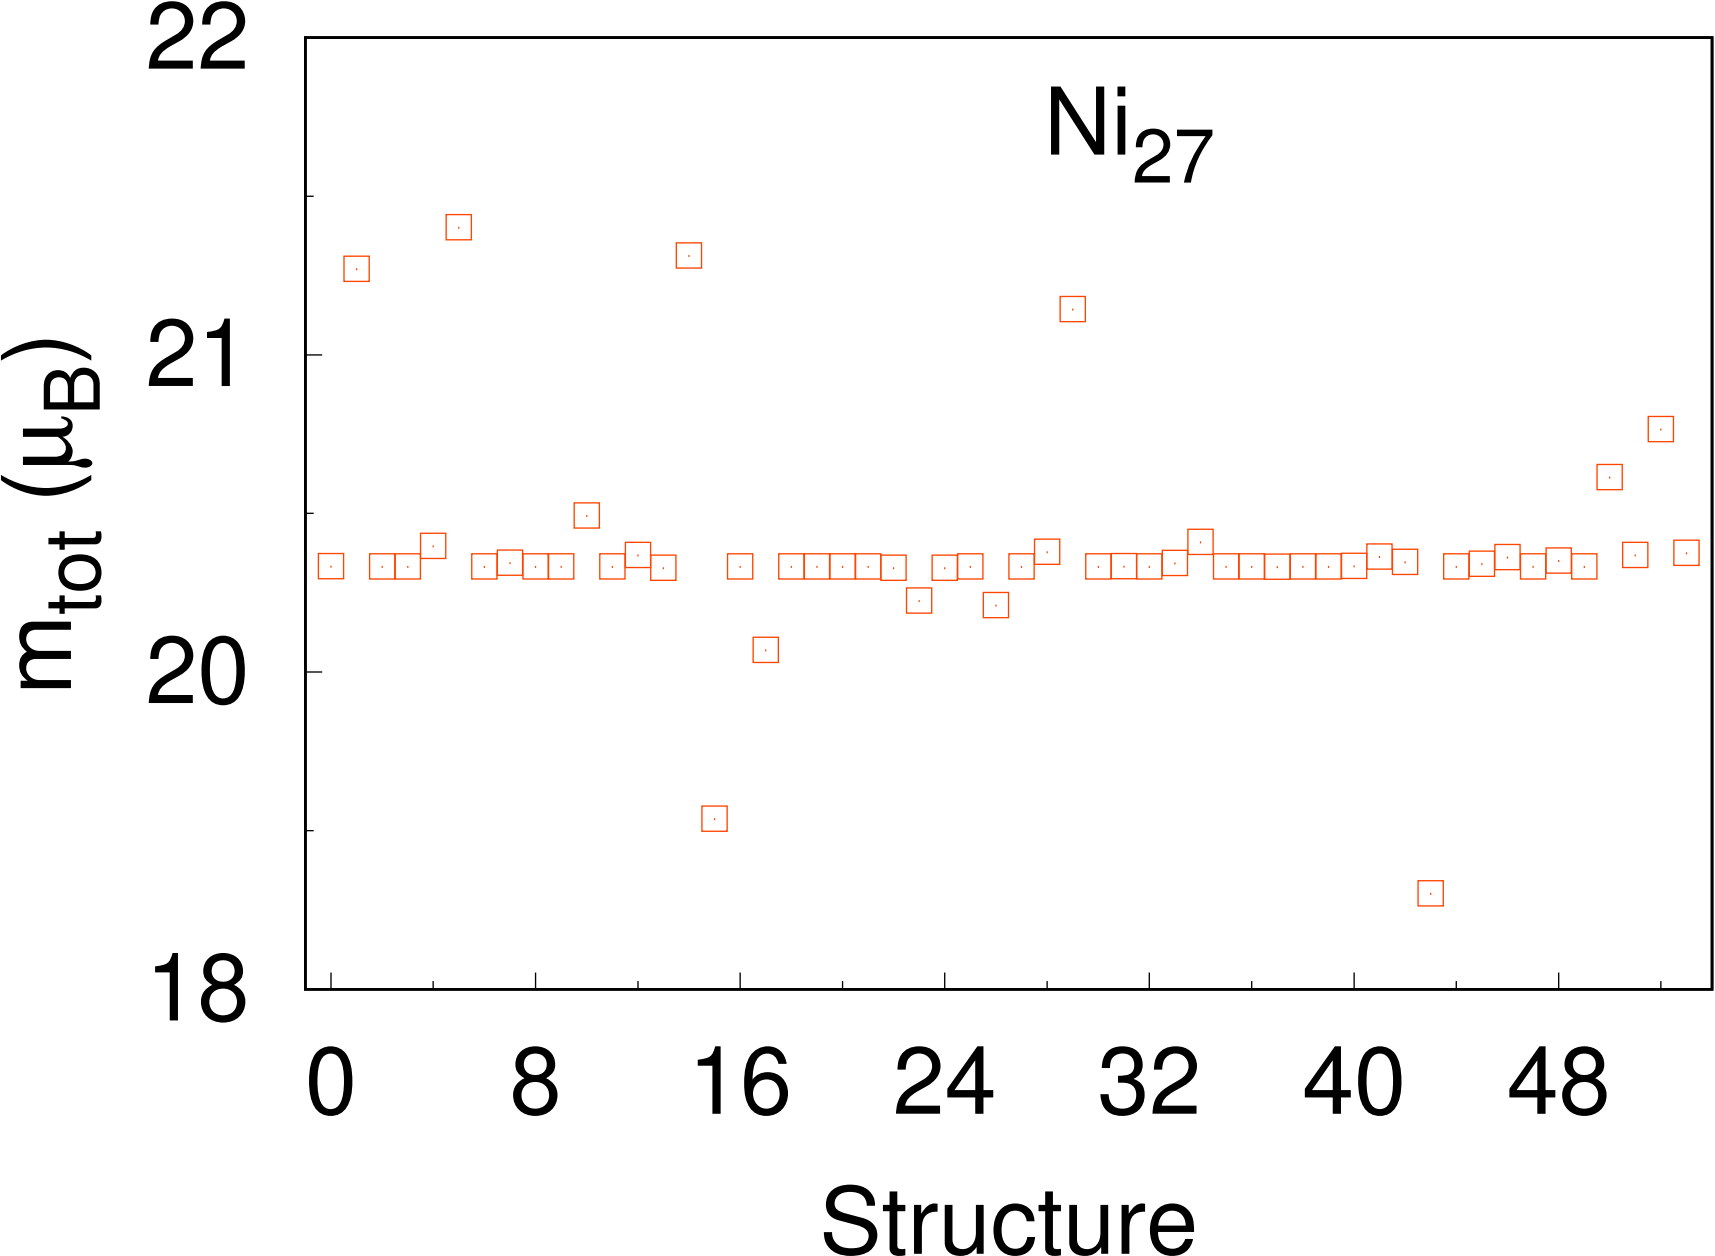

Supplement: d4cp00672k1.zip [file d4cp00672k1.zip]

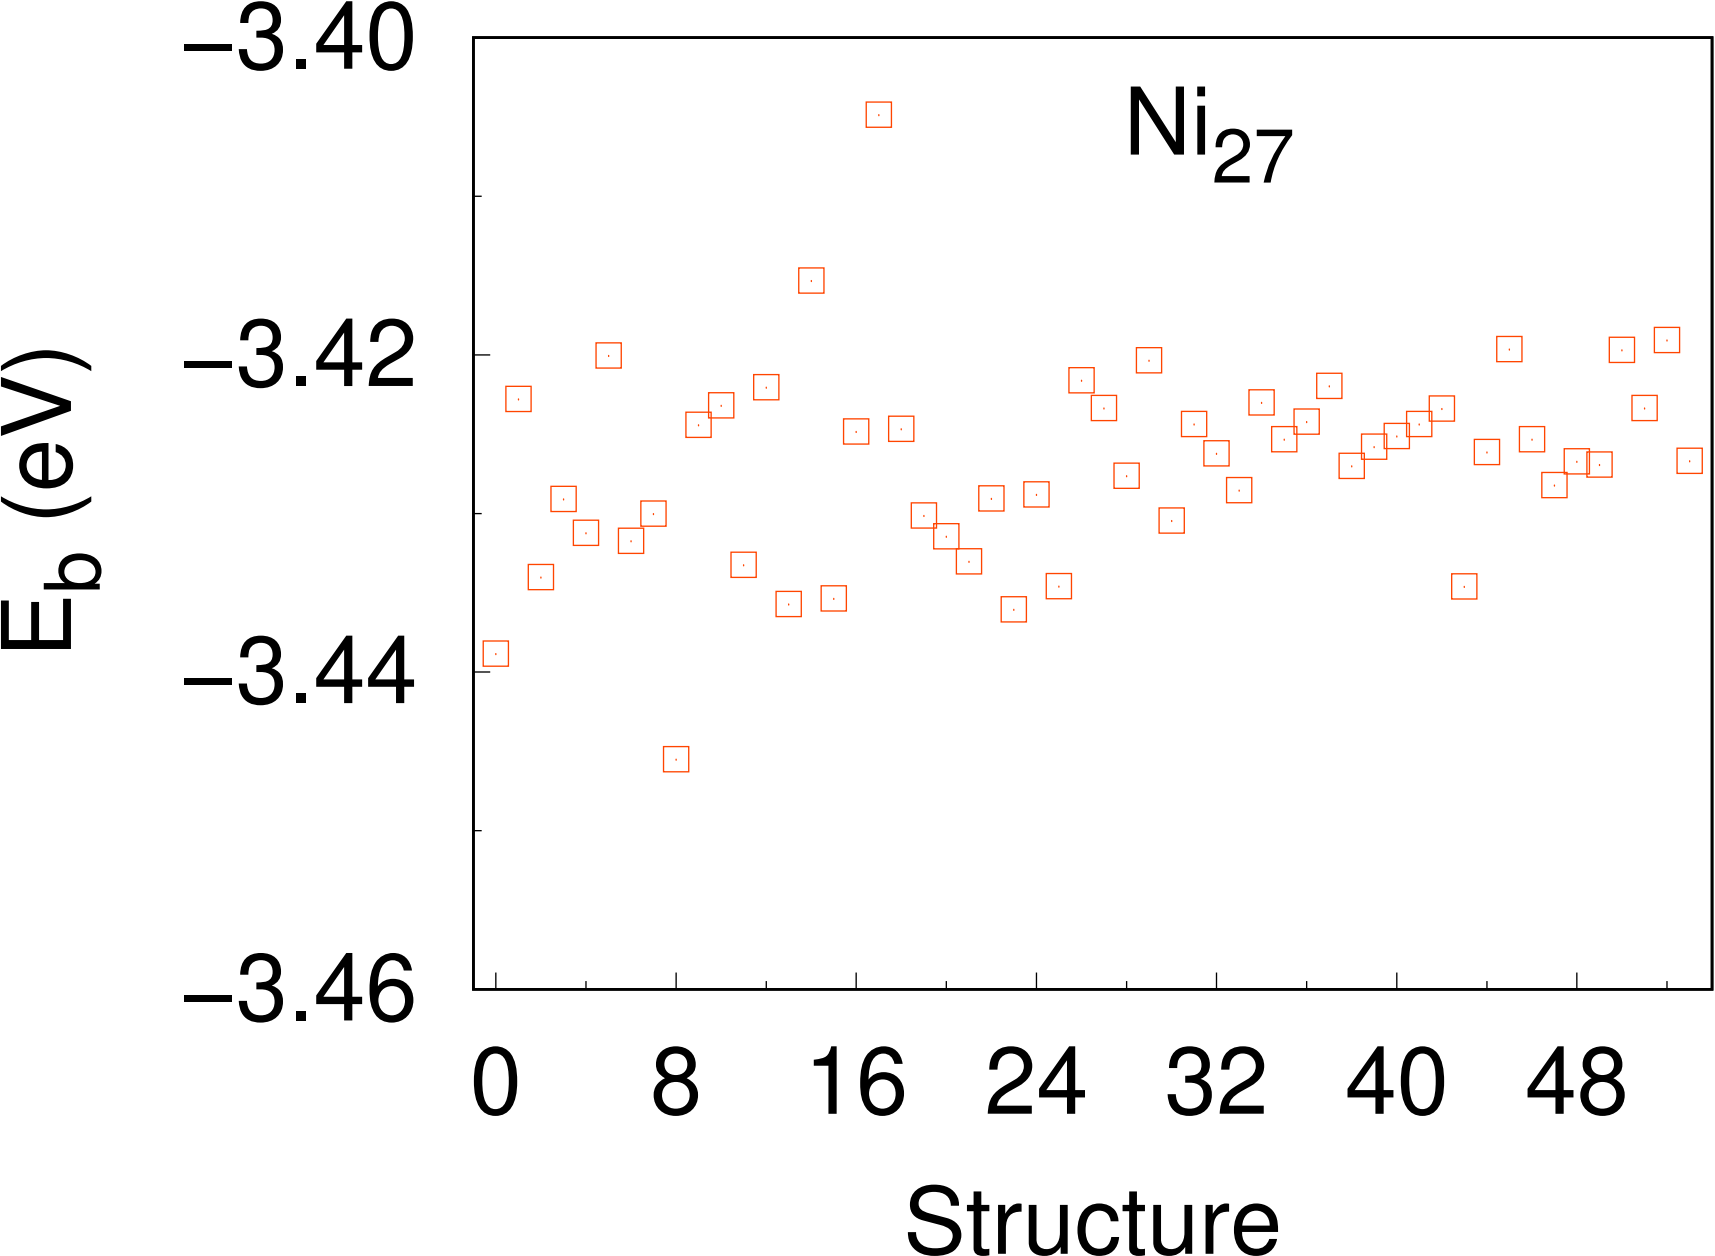

Supplement: d4cp00672k1.zip [file d4cp00672k1.zip]

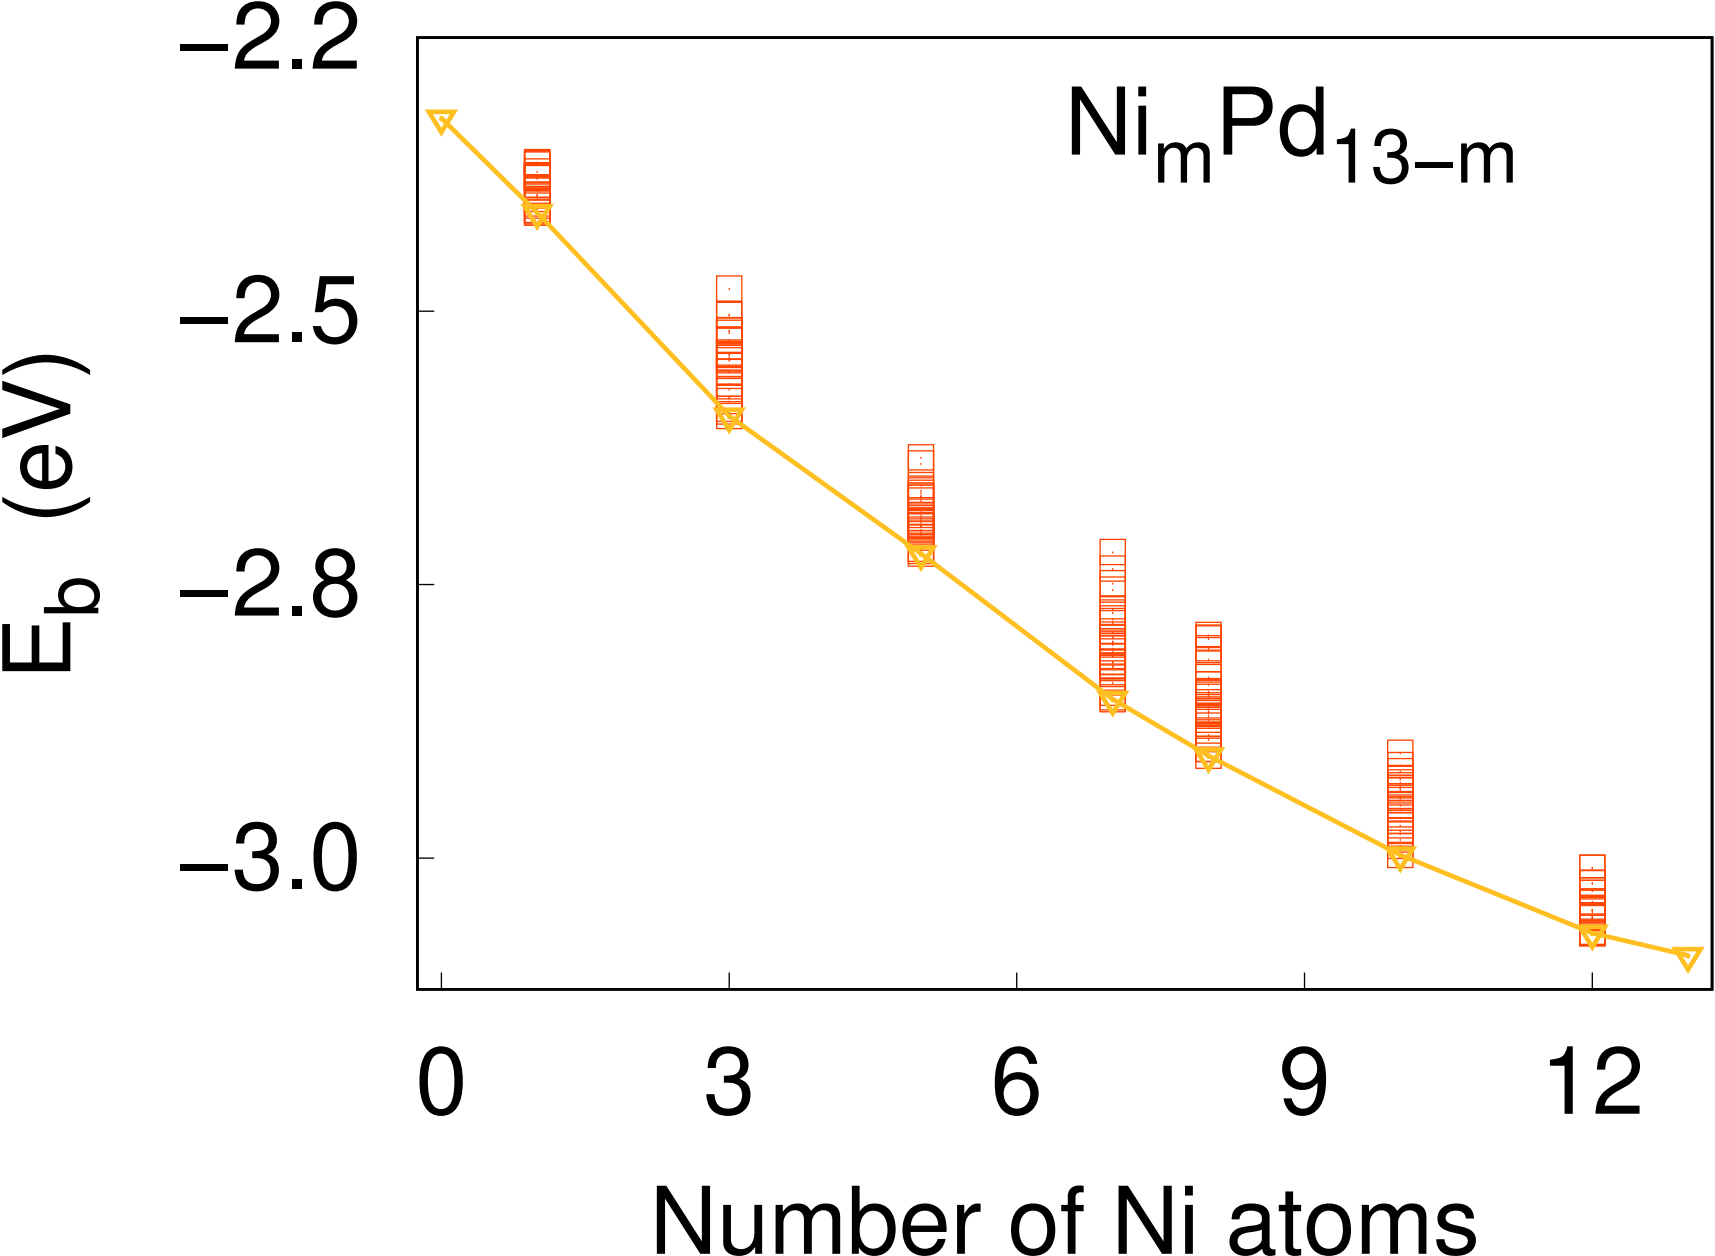

Supplement: d4cp00672k1.zip [file d4cp00672k1.zip]

△ 13 Atoms    □ 27 Atoms    ◇ 41 Atoms    — Linear Regression

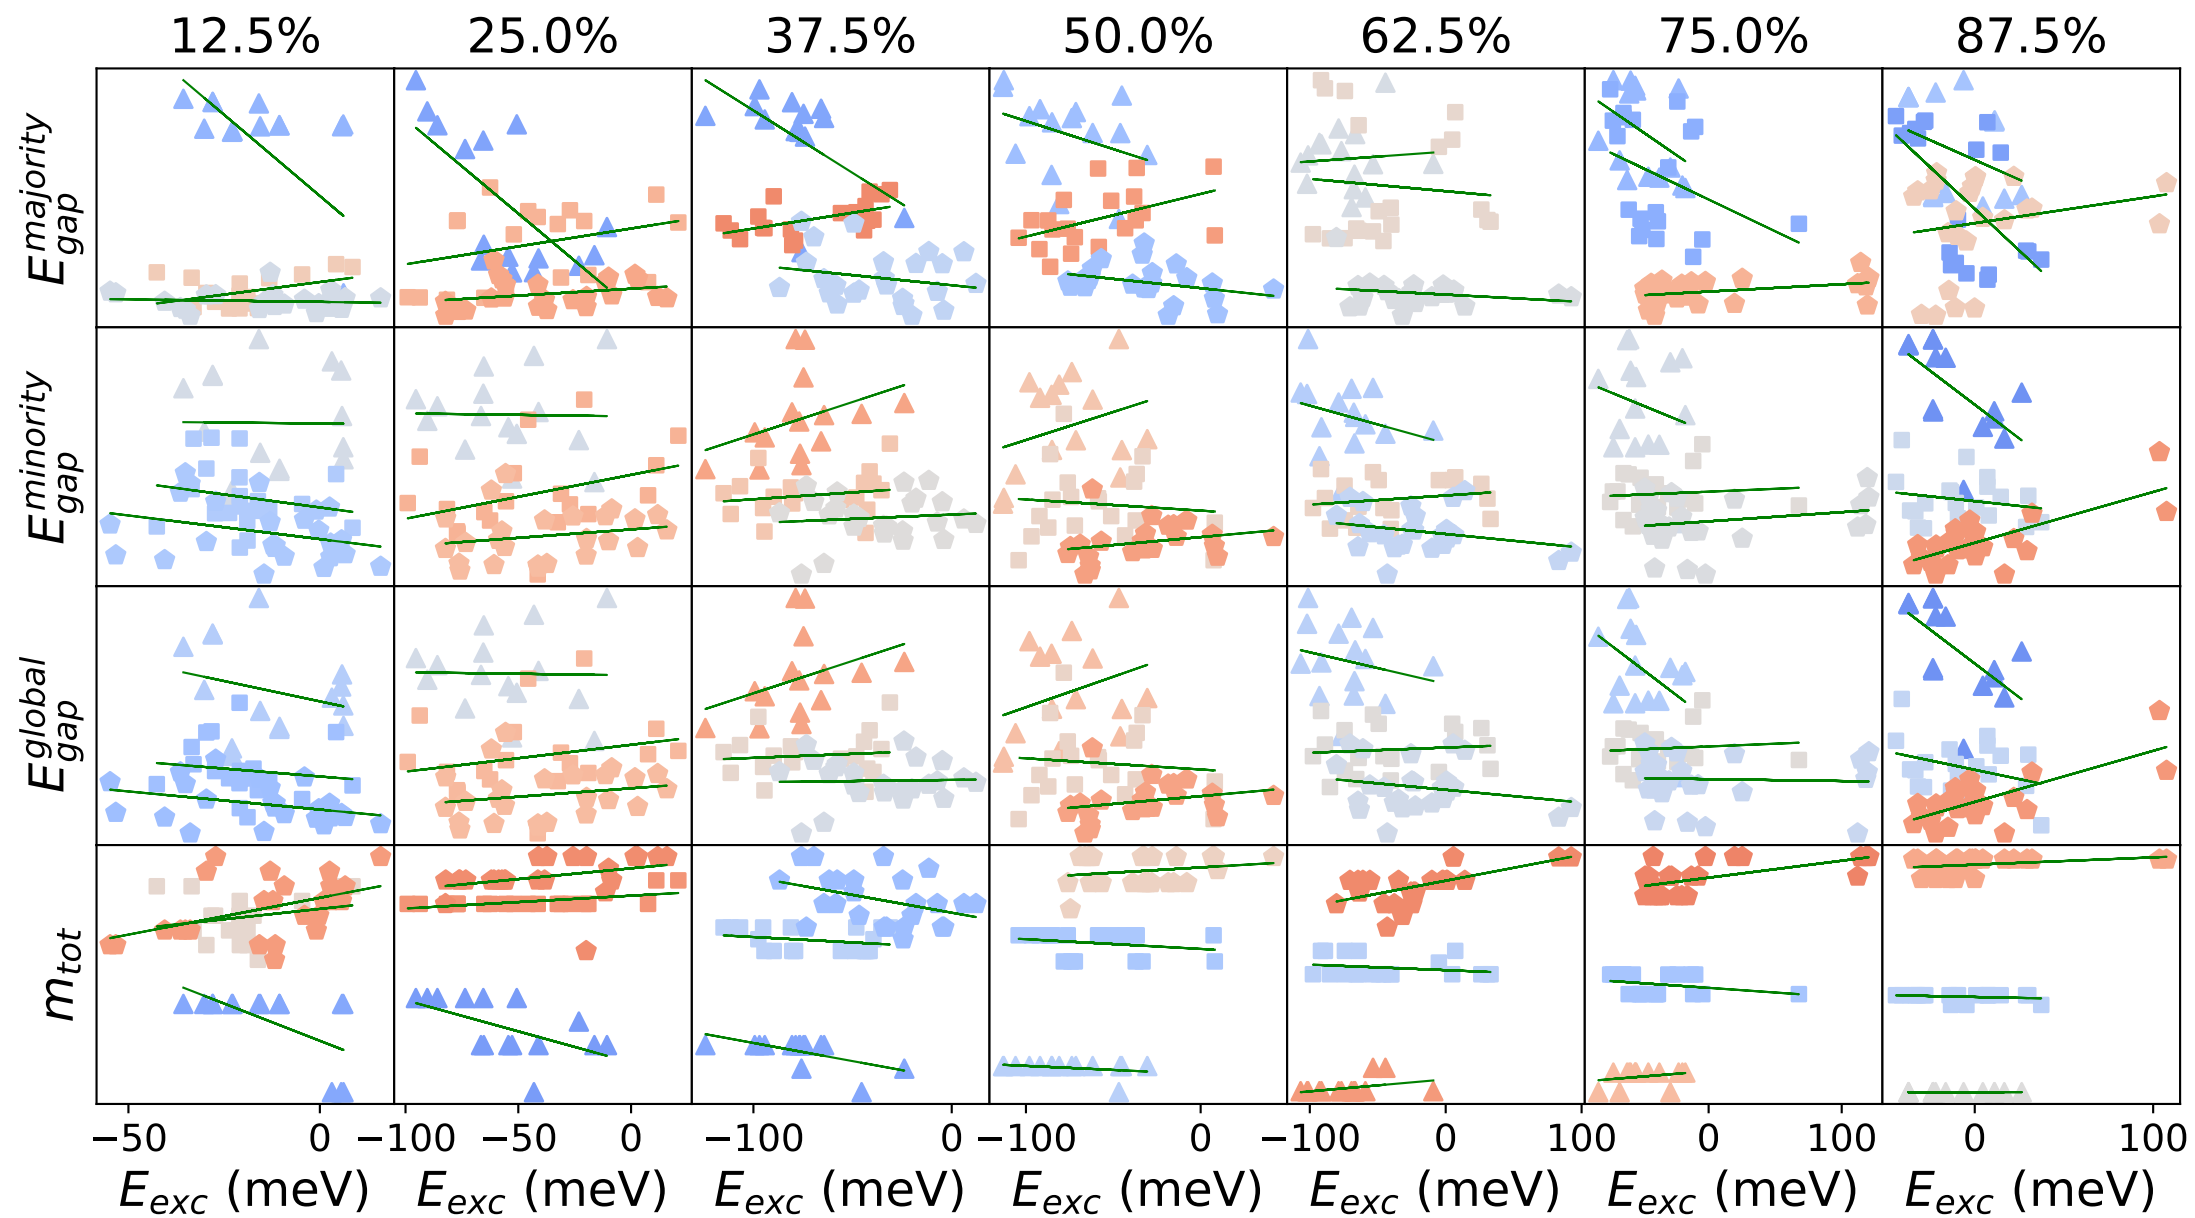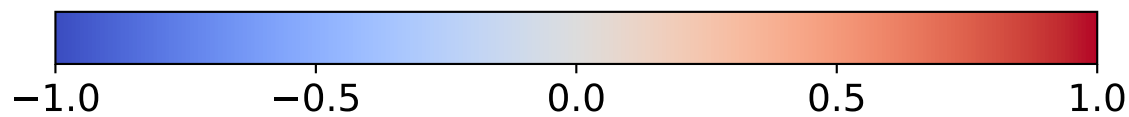

Supplement: d4cp00672k1.zip [file d4cp00672k1.zip]

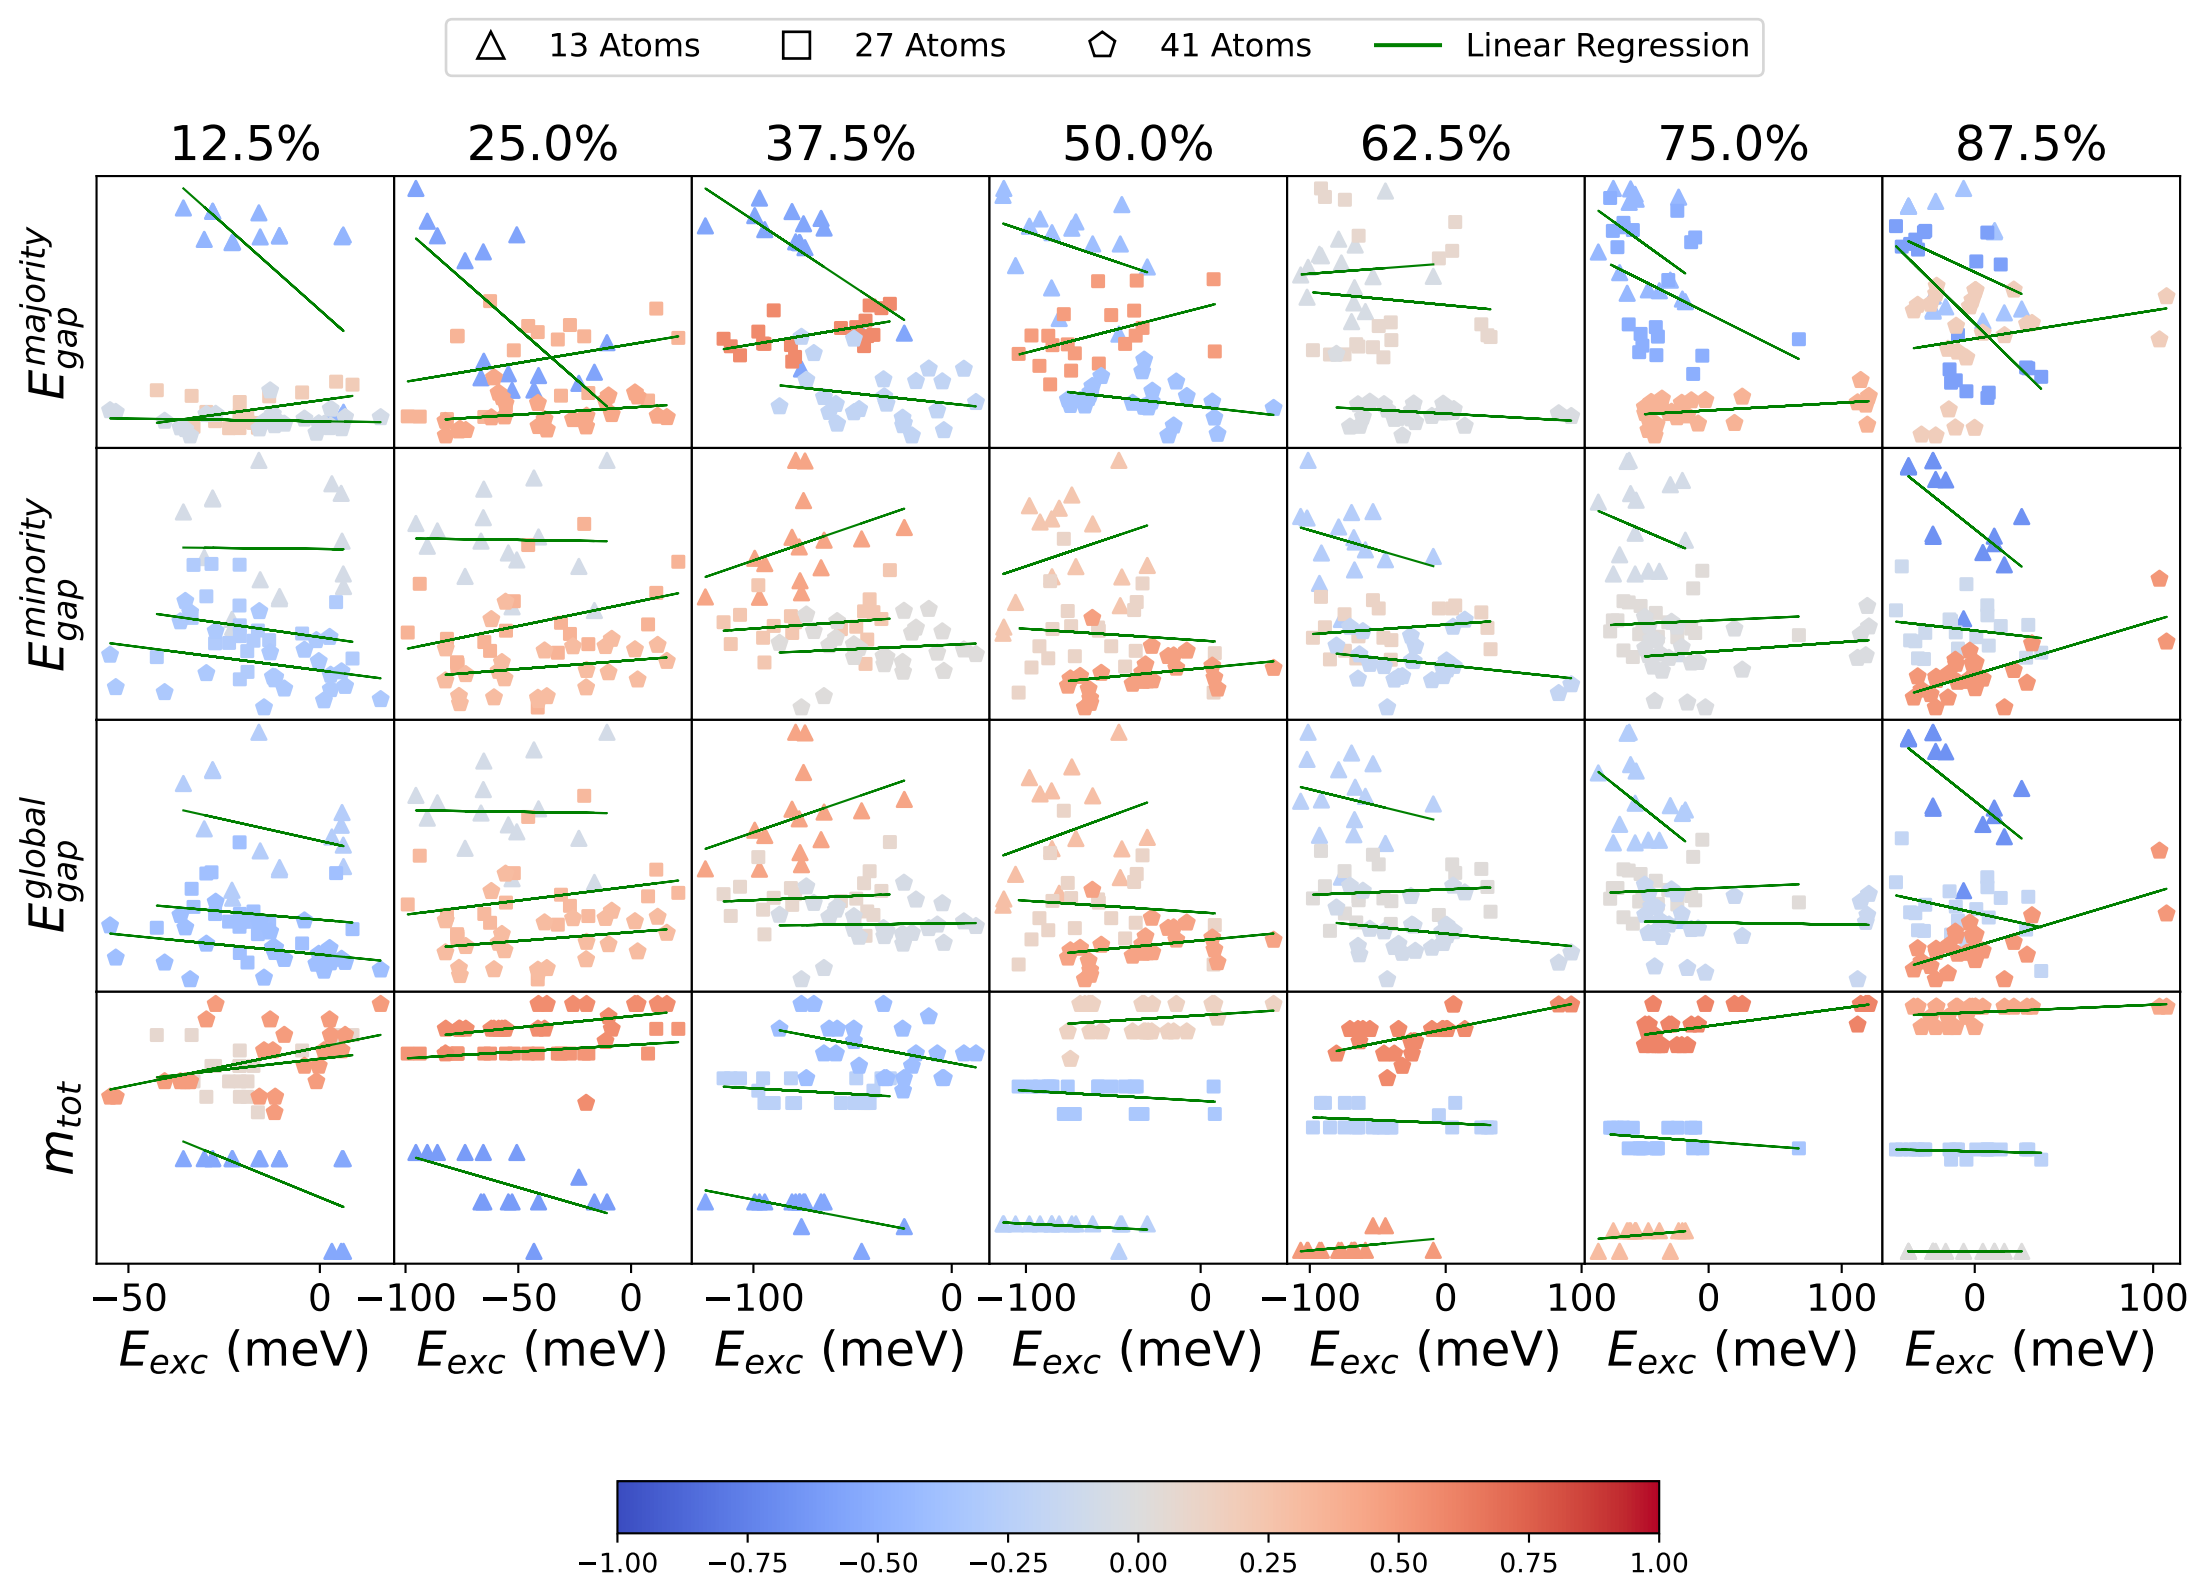

Supplement: d4cp00672k1.zip [file d4cp00672k1.zip]

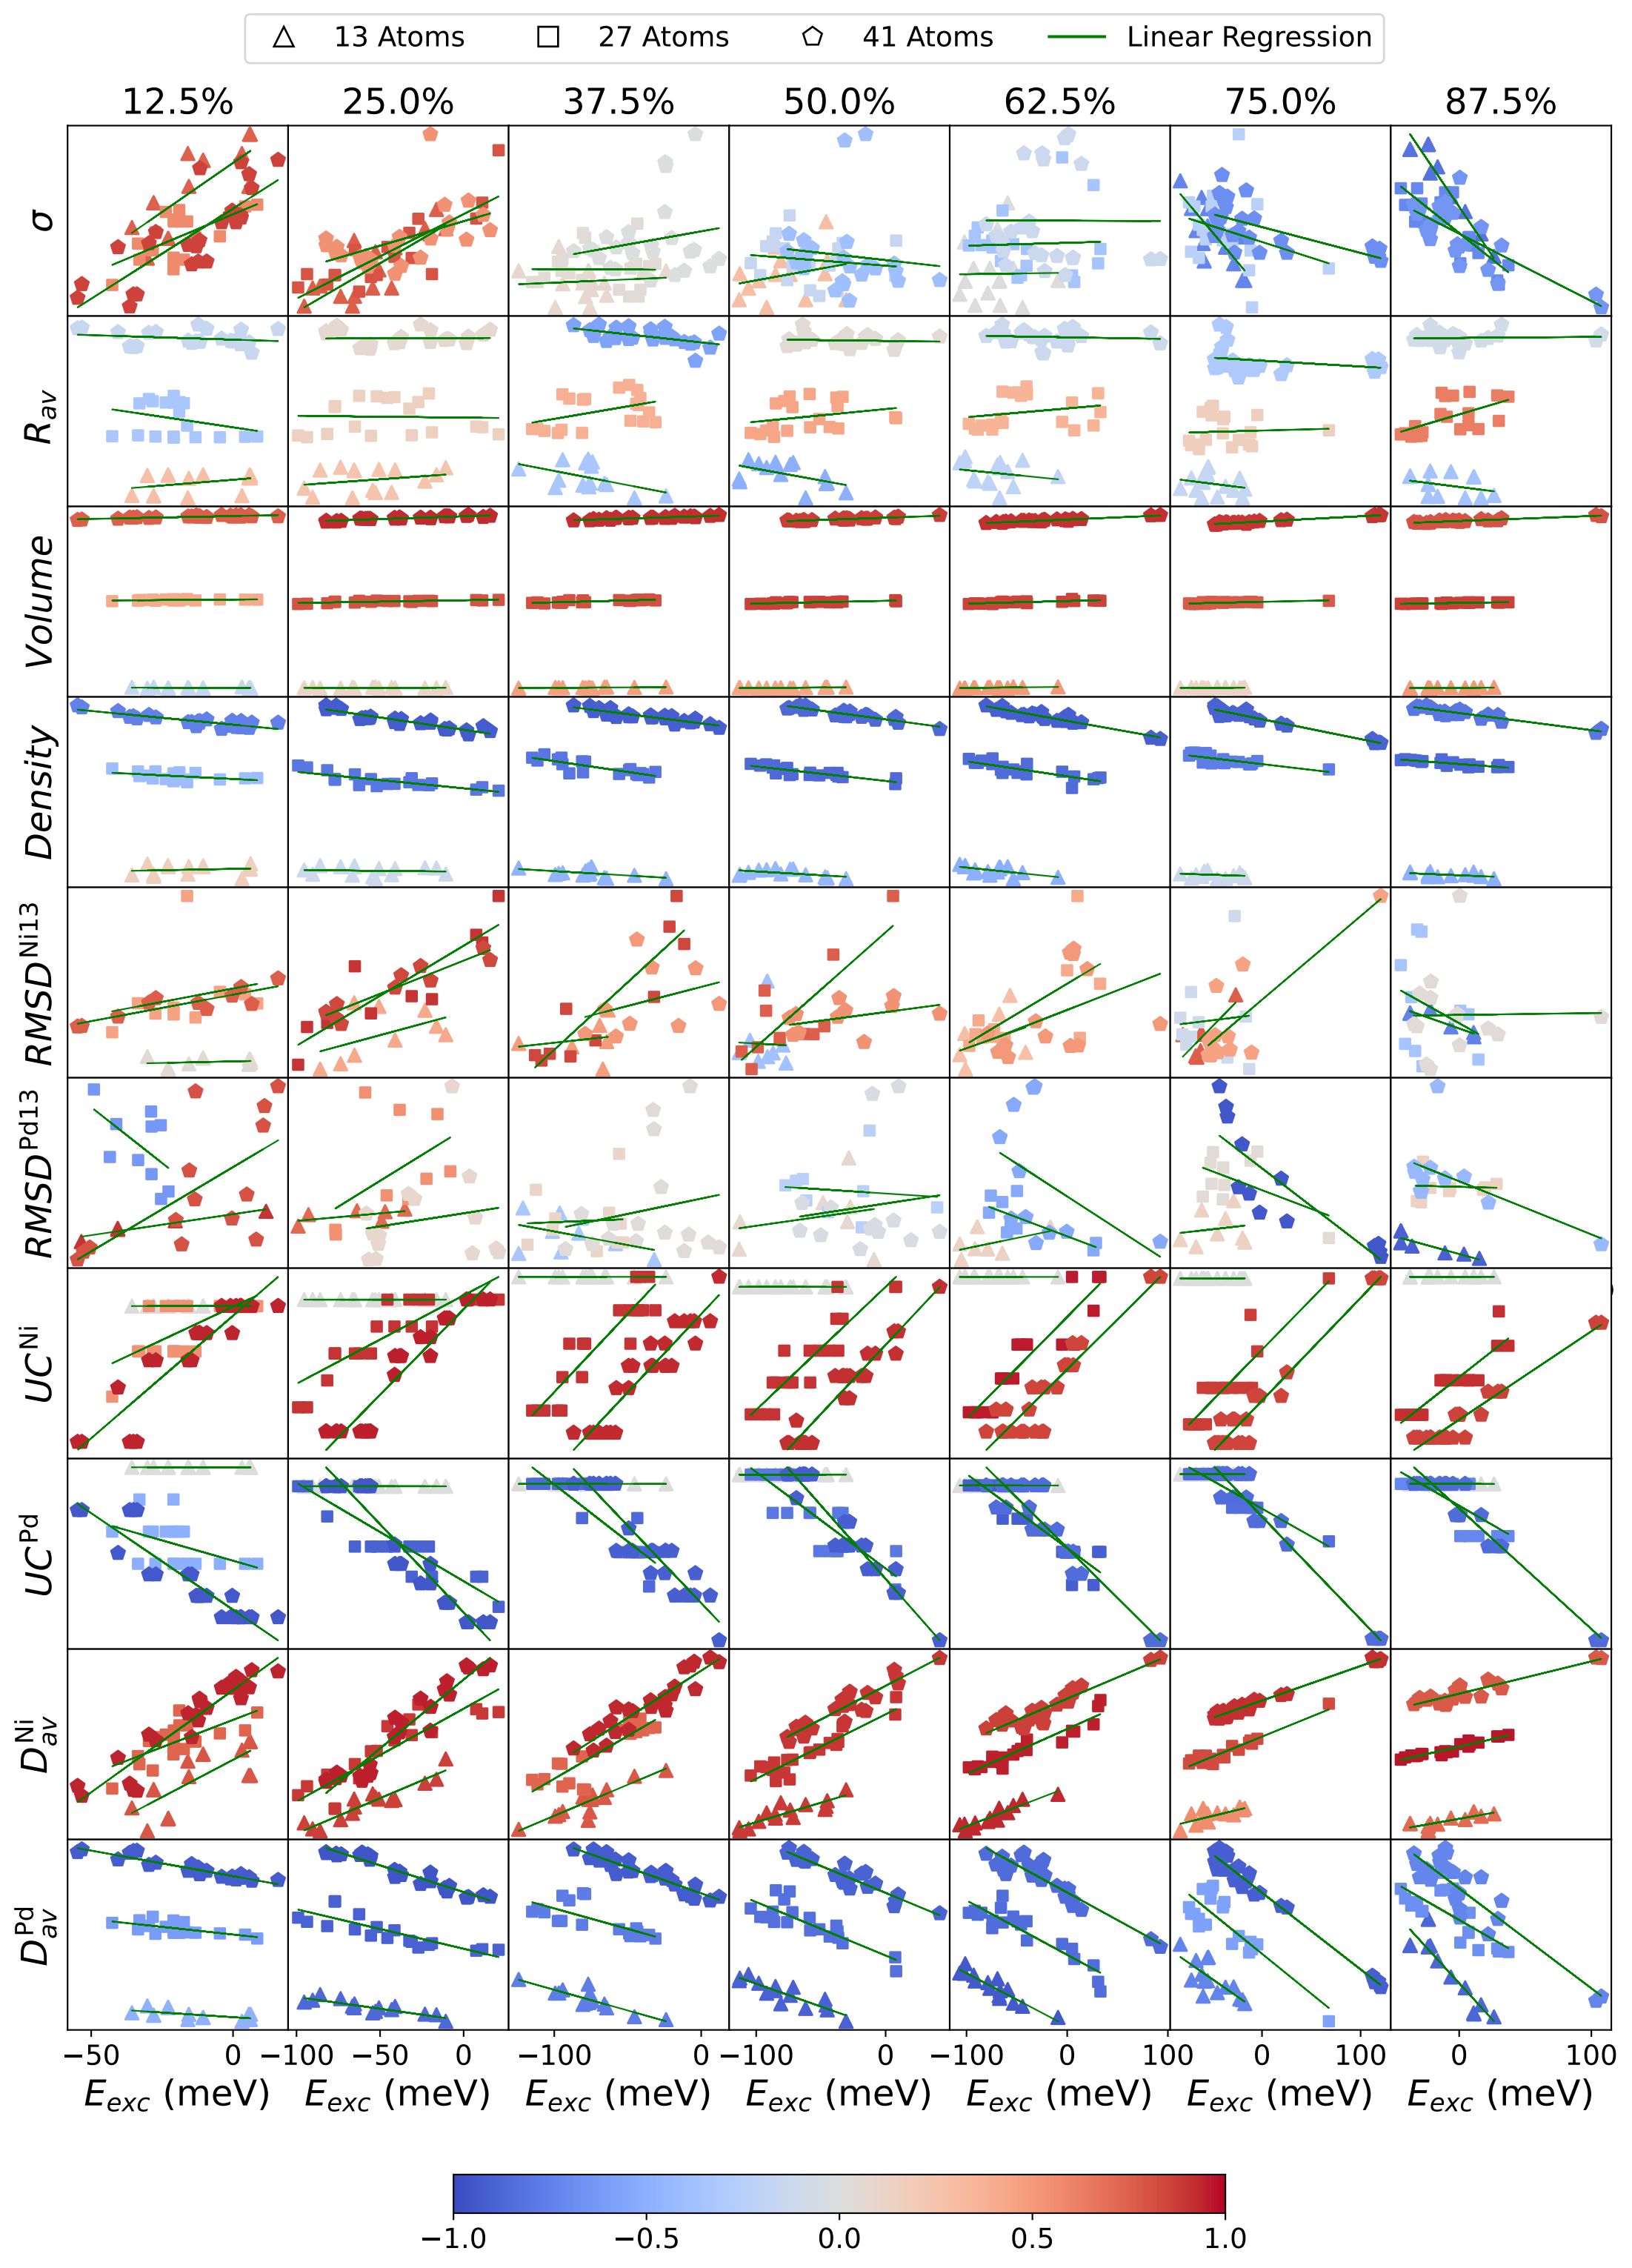

Supplement: d4cp00672k1.zip [file d4cp00672k1.zip]

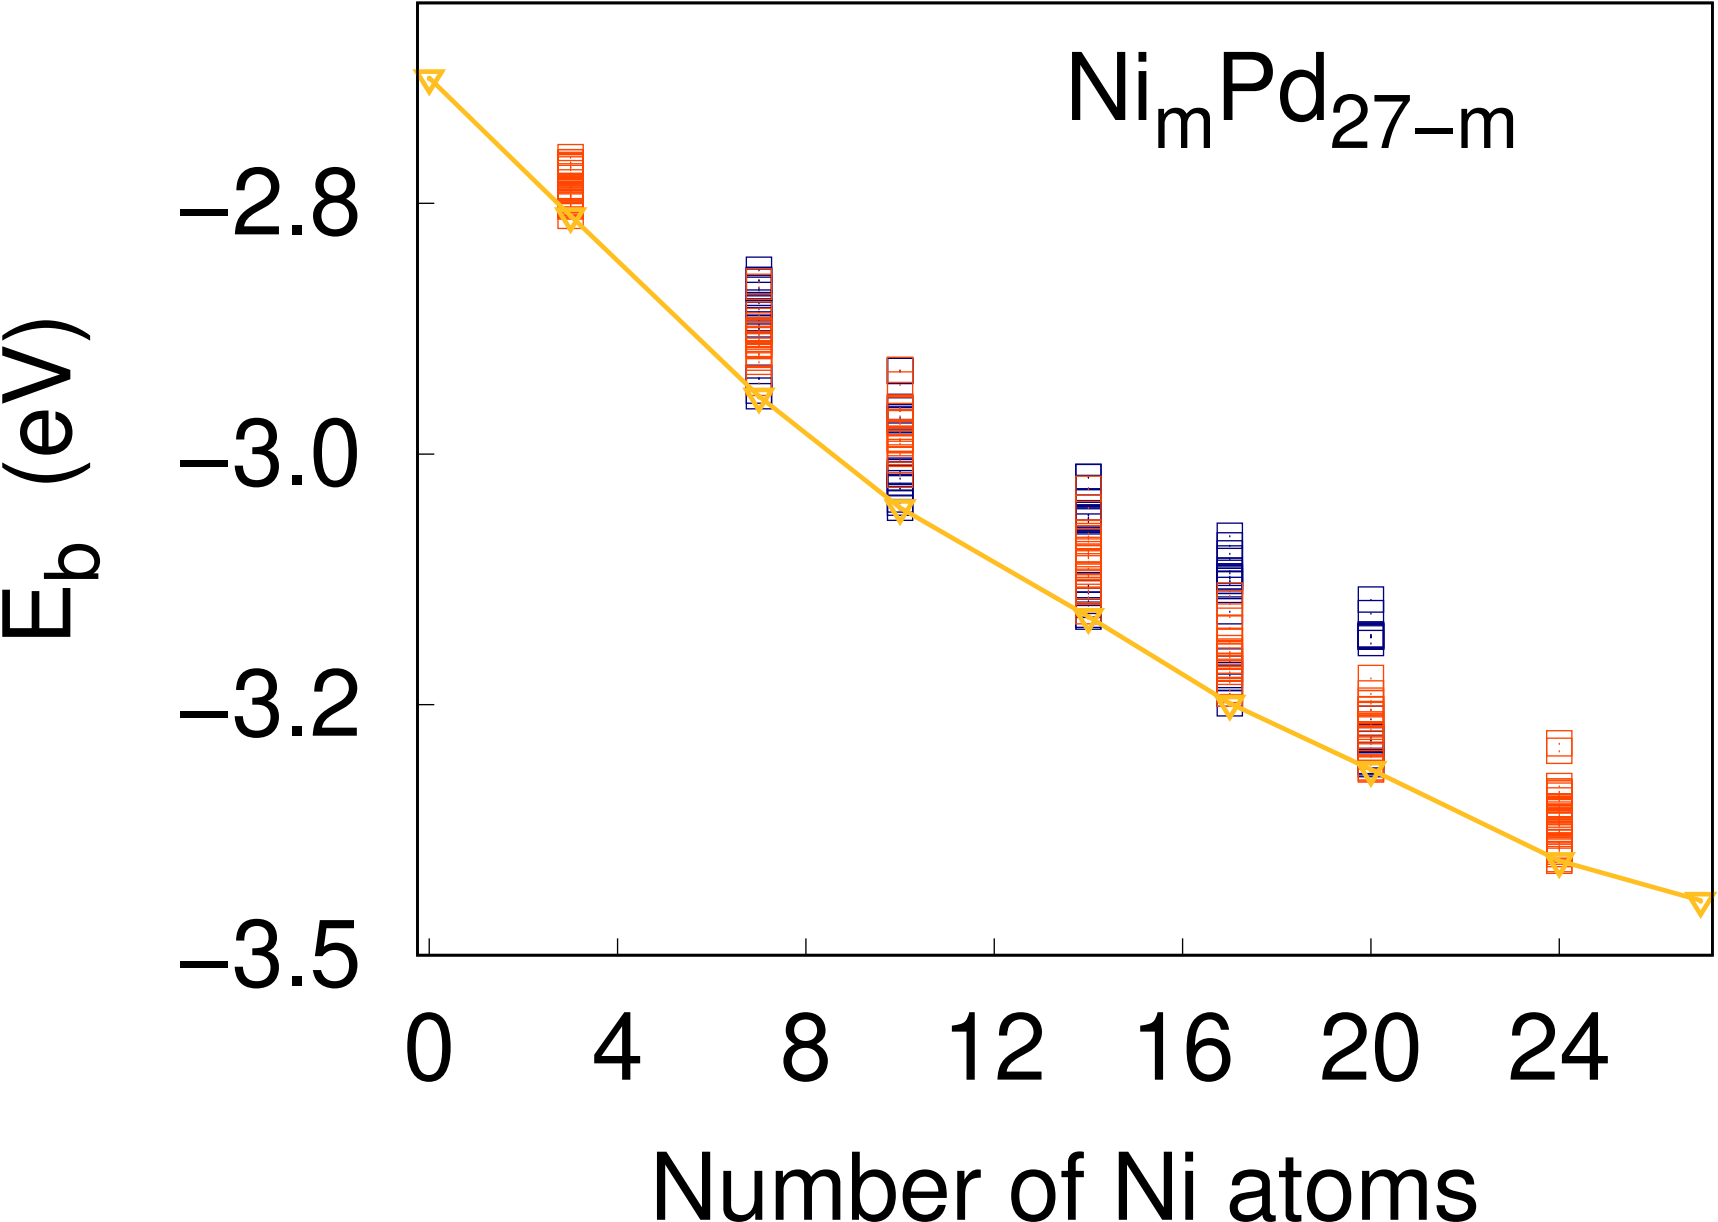

Supplement: d4cp00672k1.zip [file d4cp00672k1.zip]

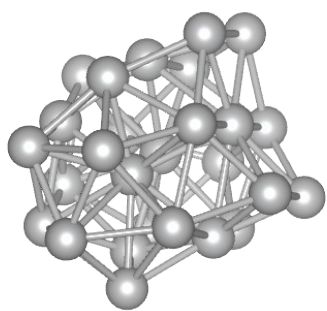

0

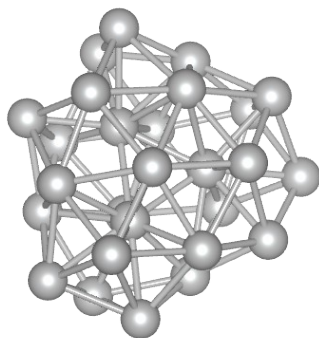

2

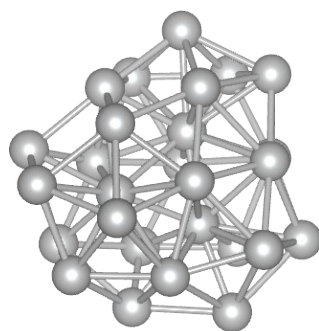

40

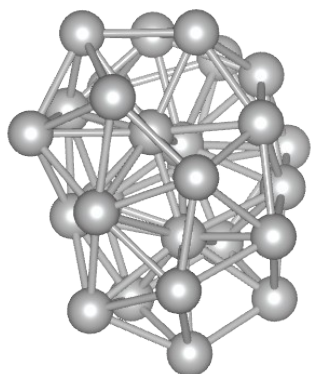

40

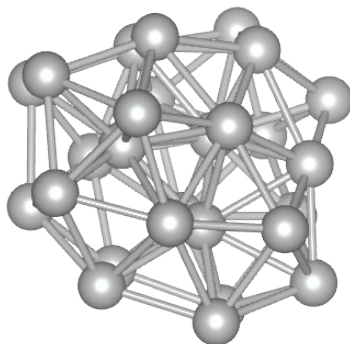

50

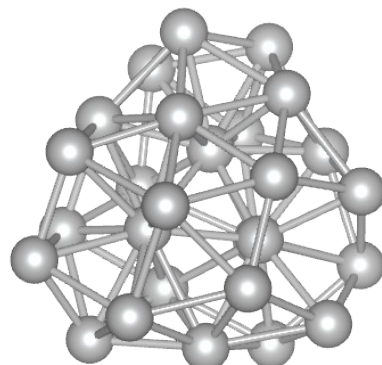

50

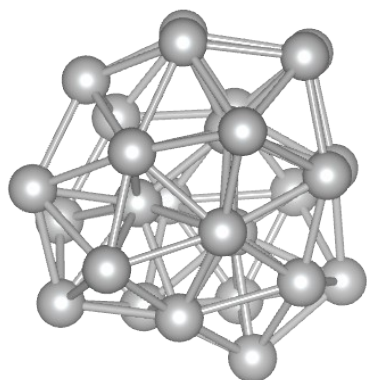

90

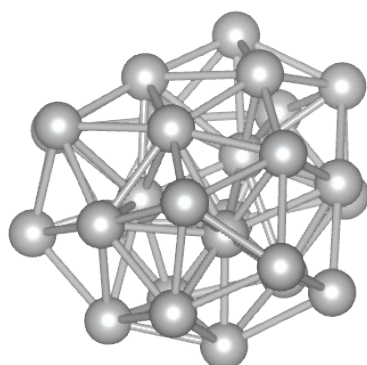

90

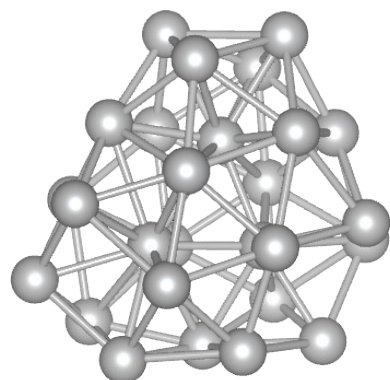

90

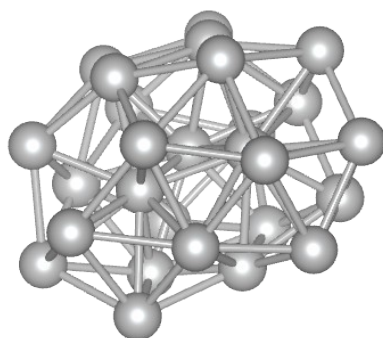

90

Supplement: d4cp00672k1.zip [file d4cp00672k1.zip]

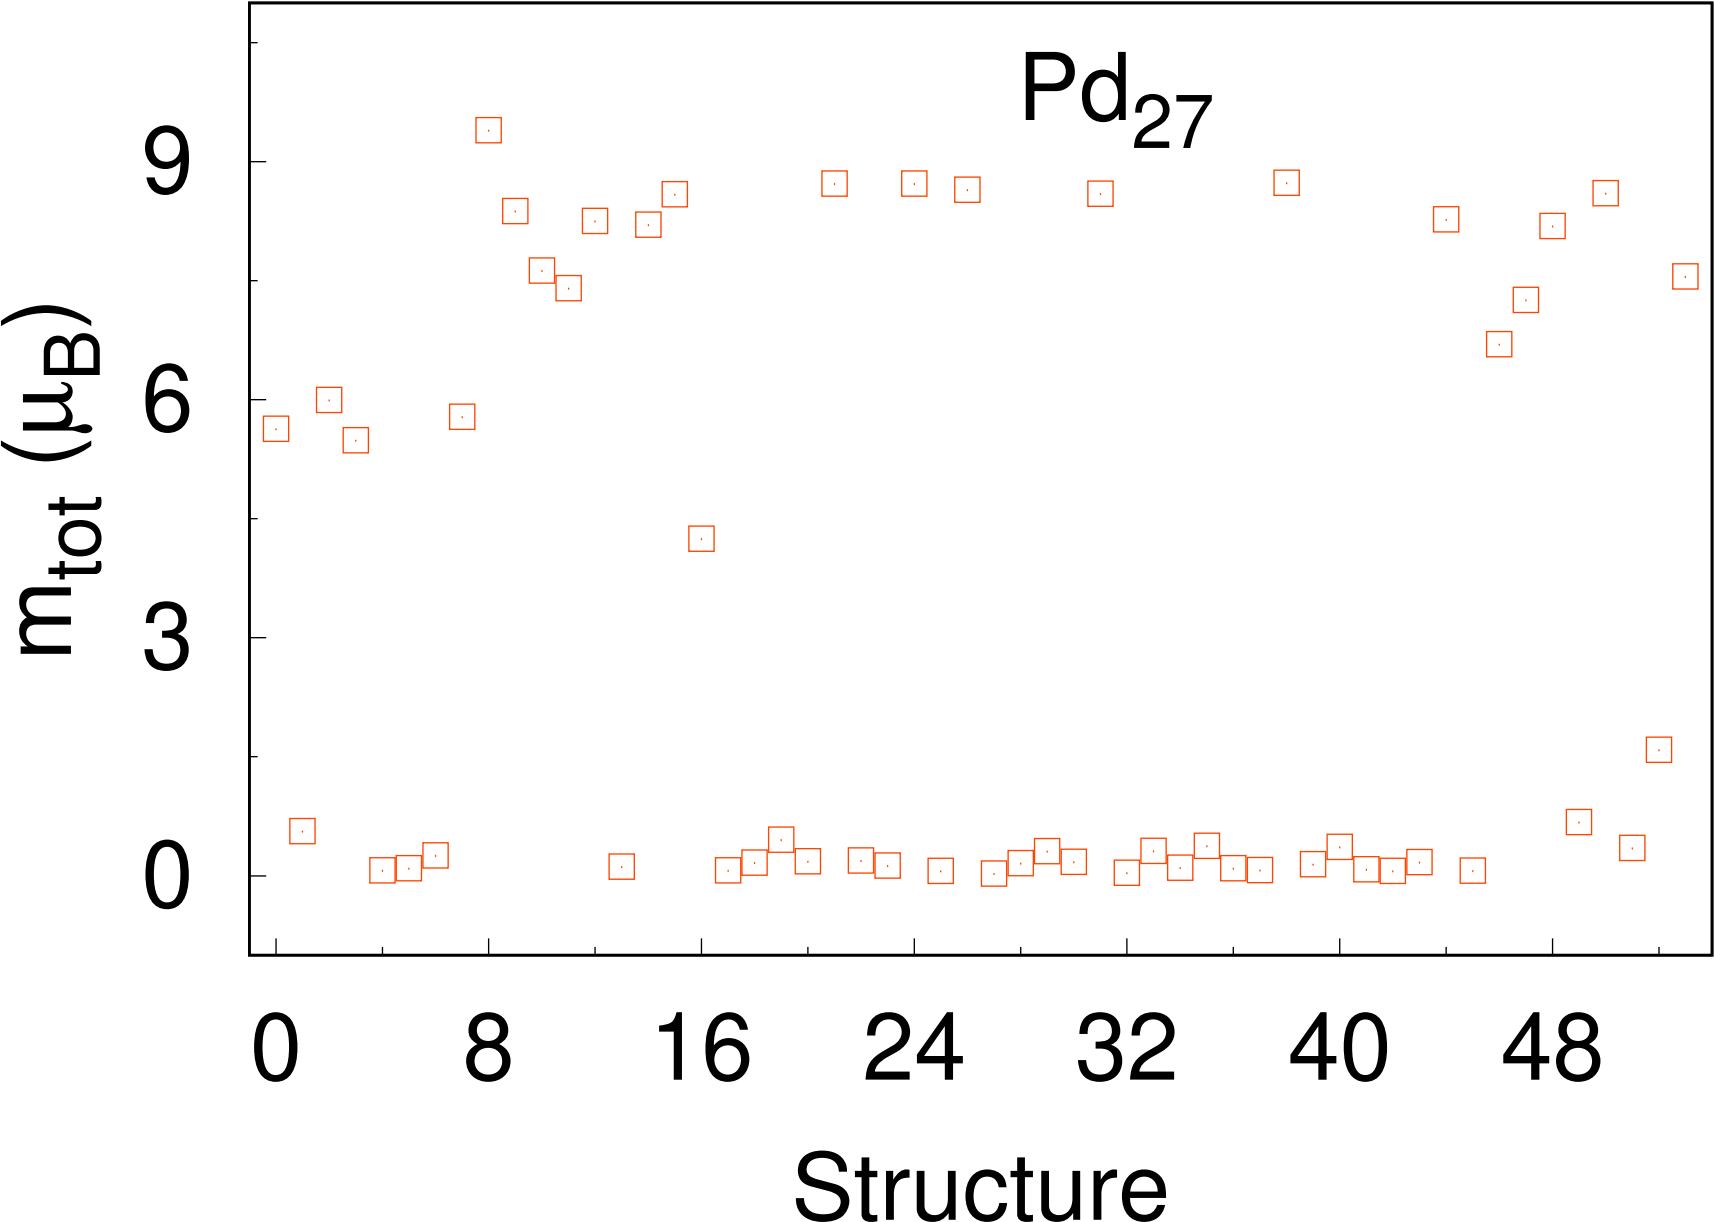

Supplement: d4cp00672k1.zip [file d4cp00672k1.zip]

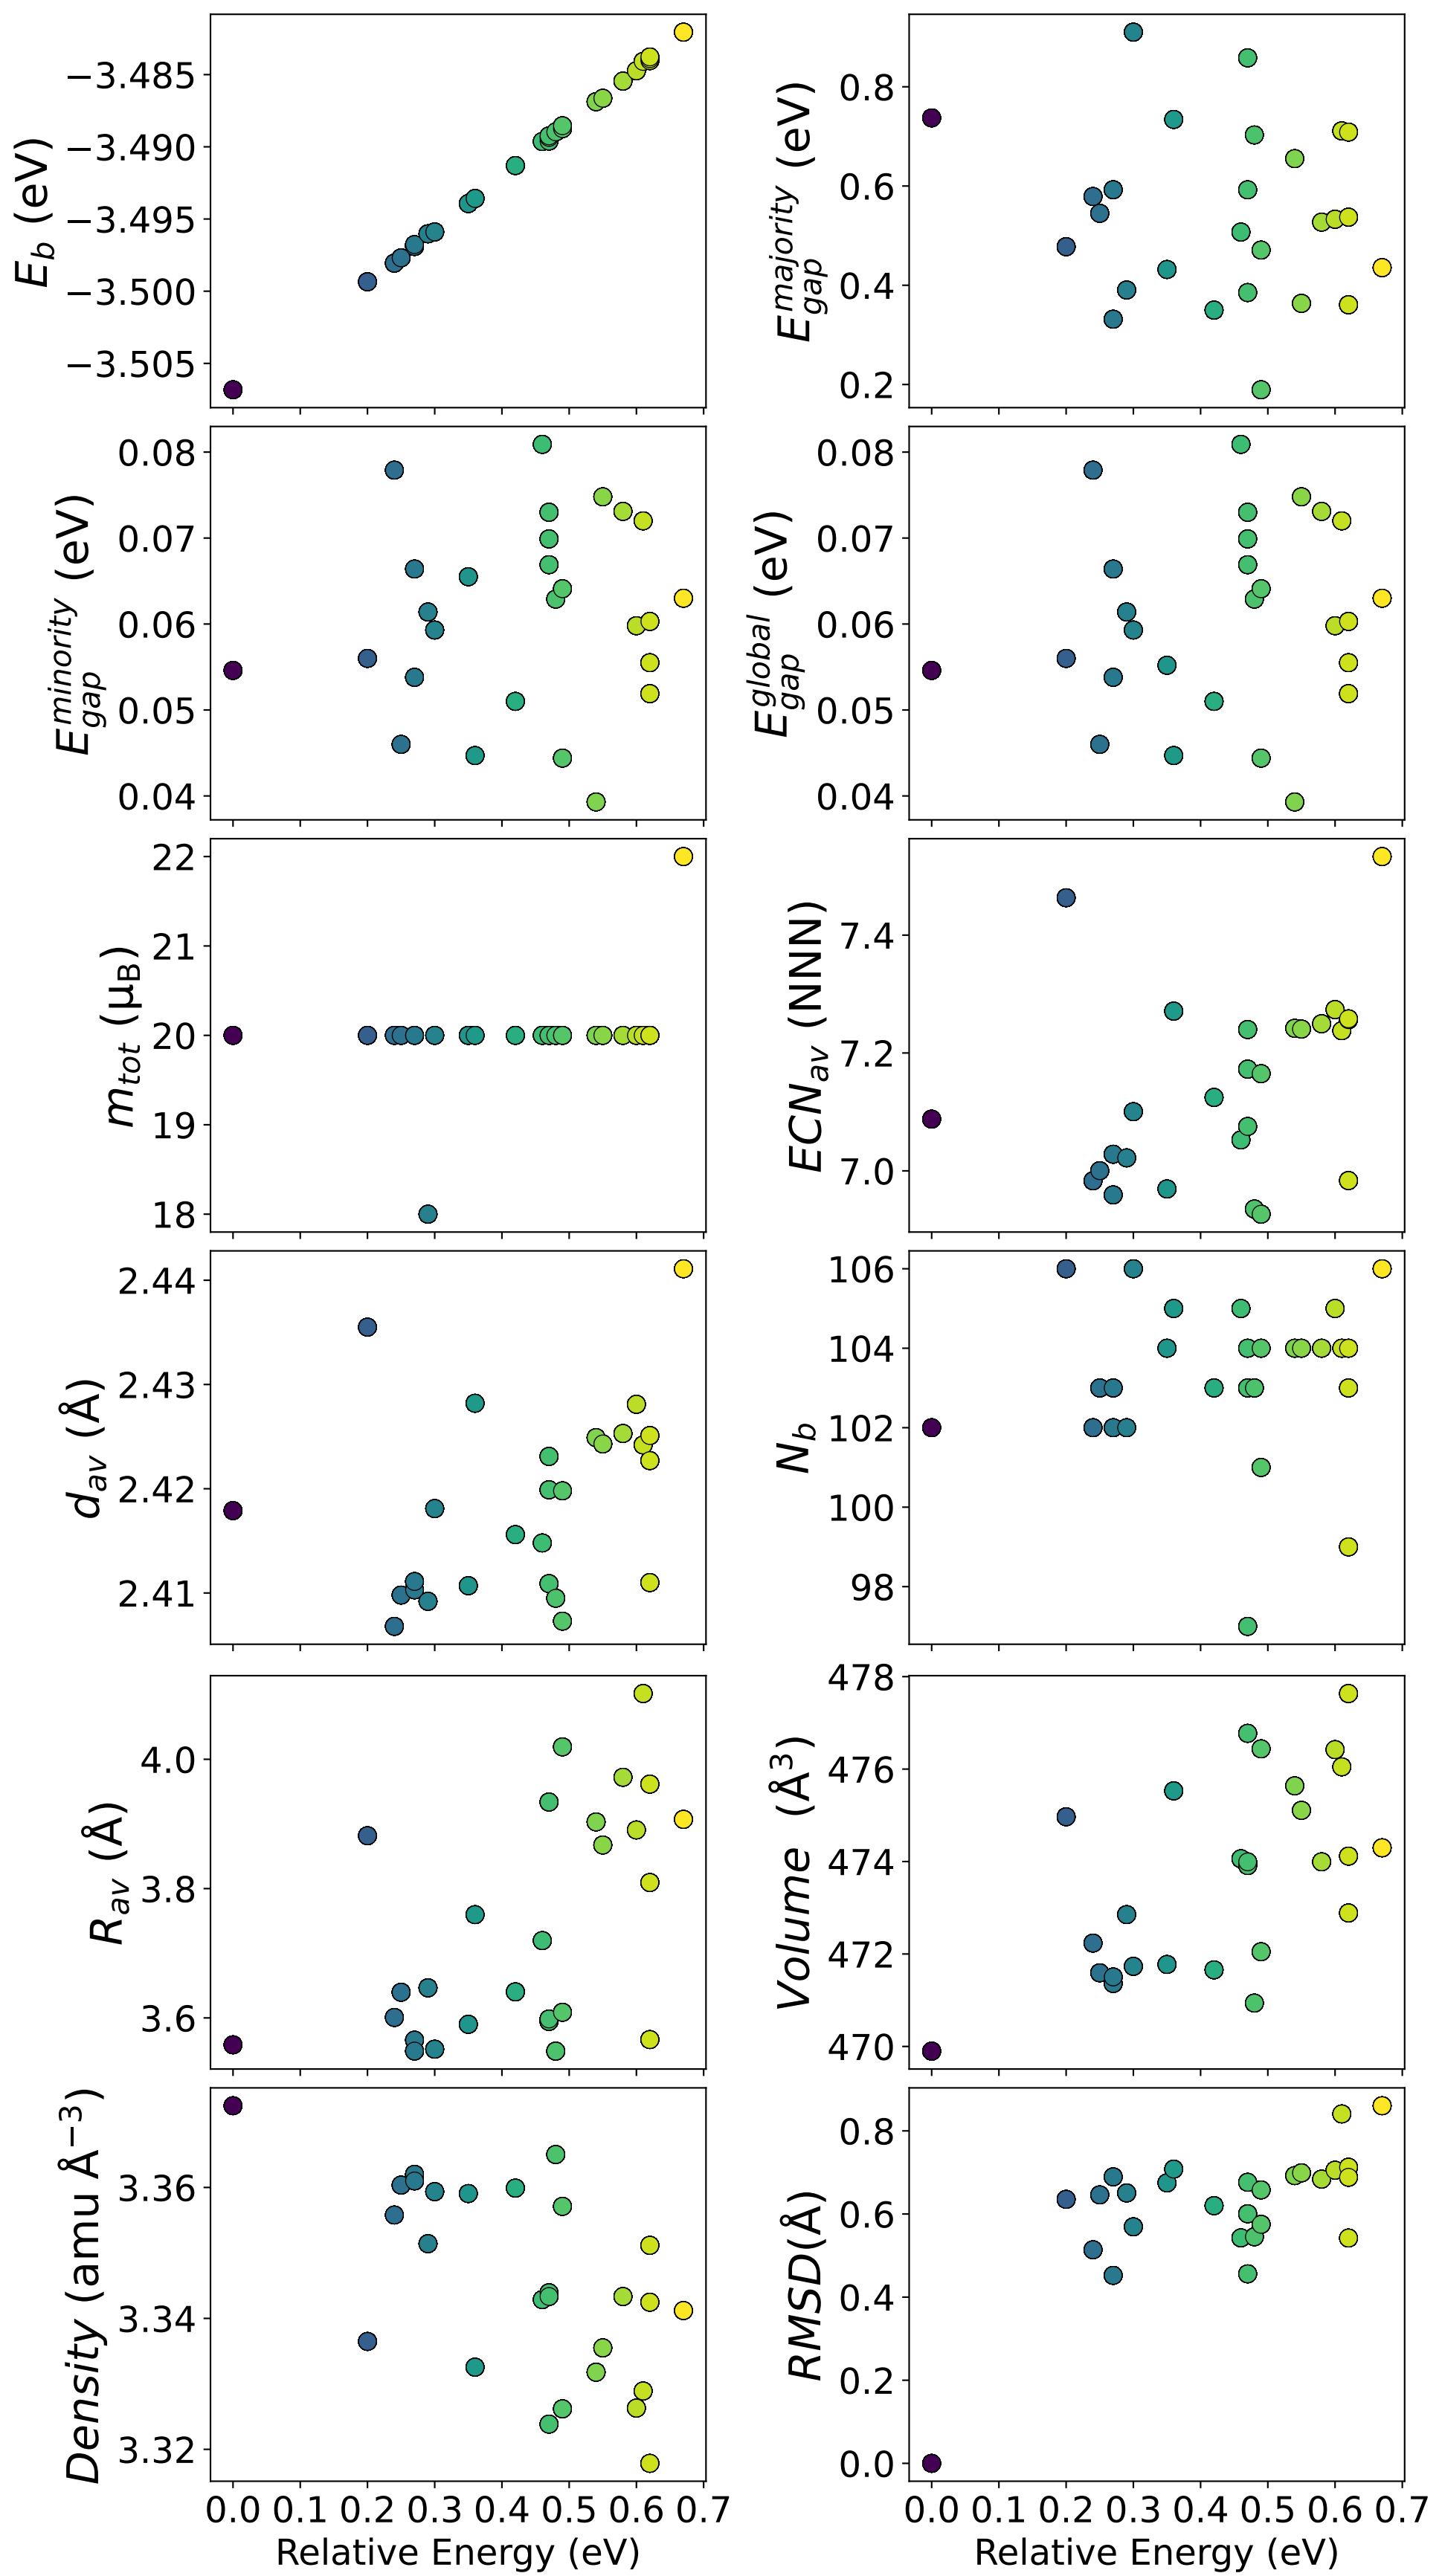

Supplement: d4cp00672k1.zip [file d4cp00672k1.zip]

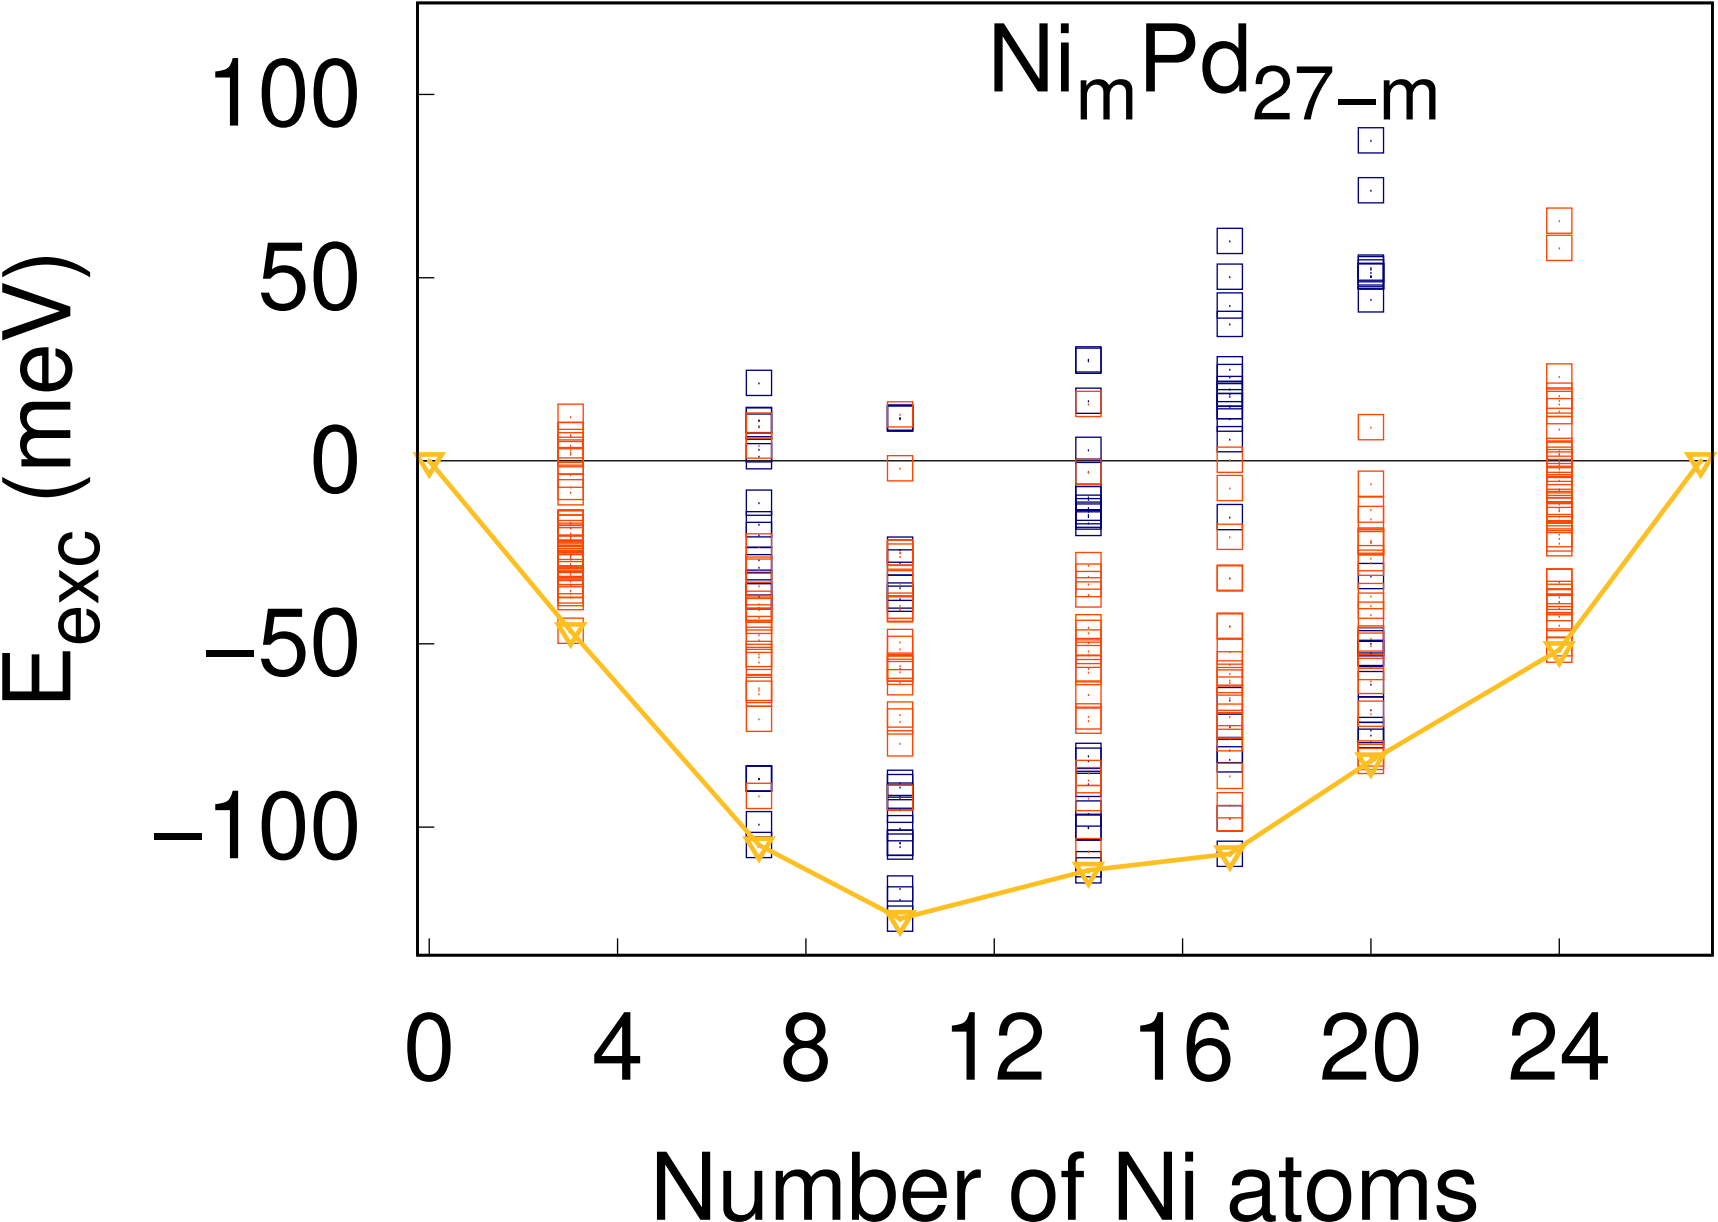

Supplement: d4cp00672k1.zip [file d4cp00672k1.zip]

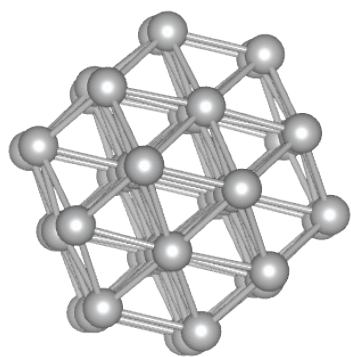

0

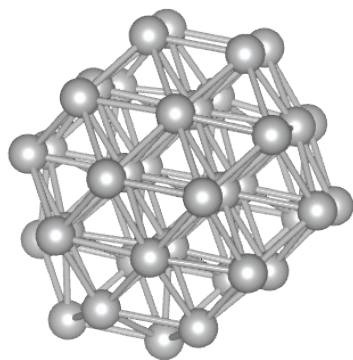

40

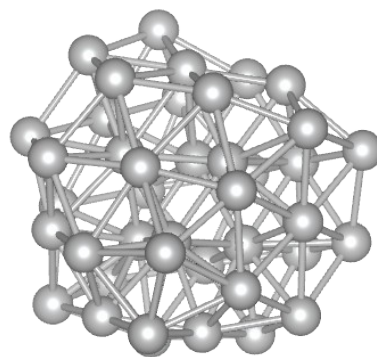

100

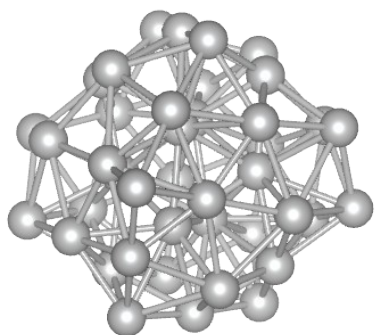

130

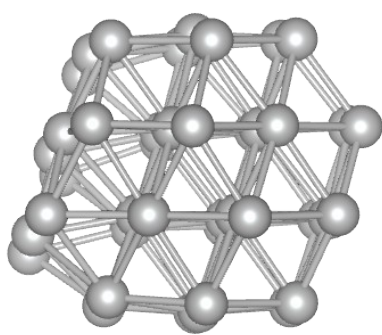

140

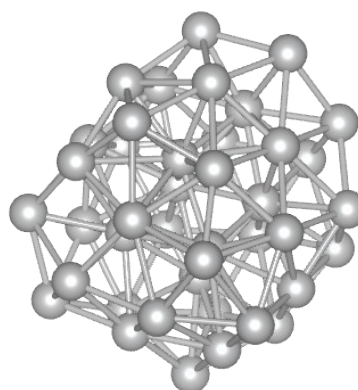

150

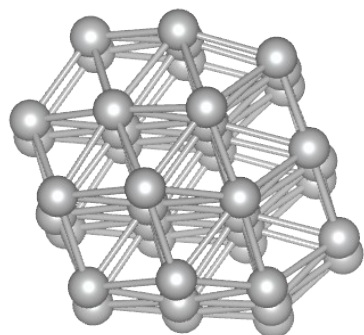

190

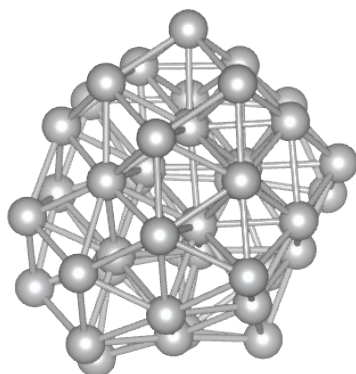

220

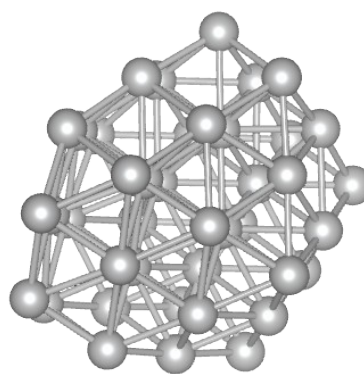

230

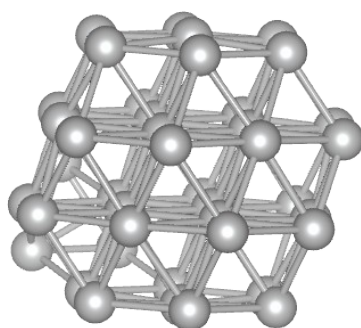

300

Supplement: d4cp00672k1.zip [file d4cp00672k1.zip]

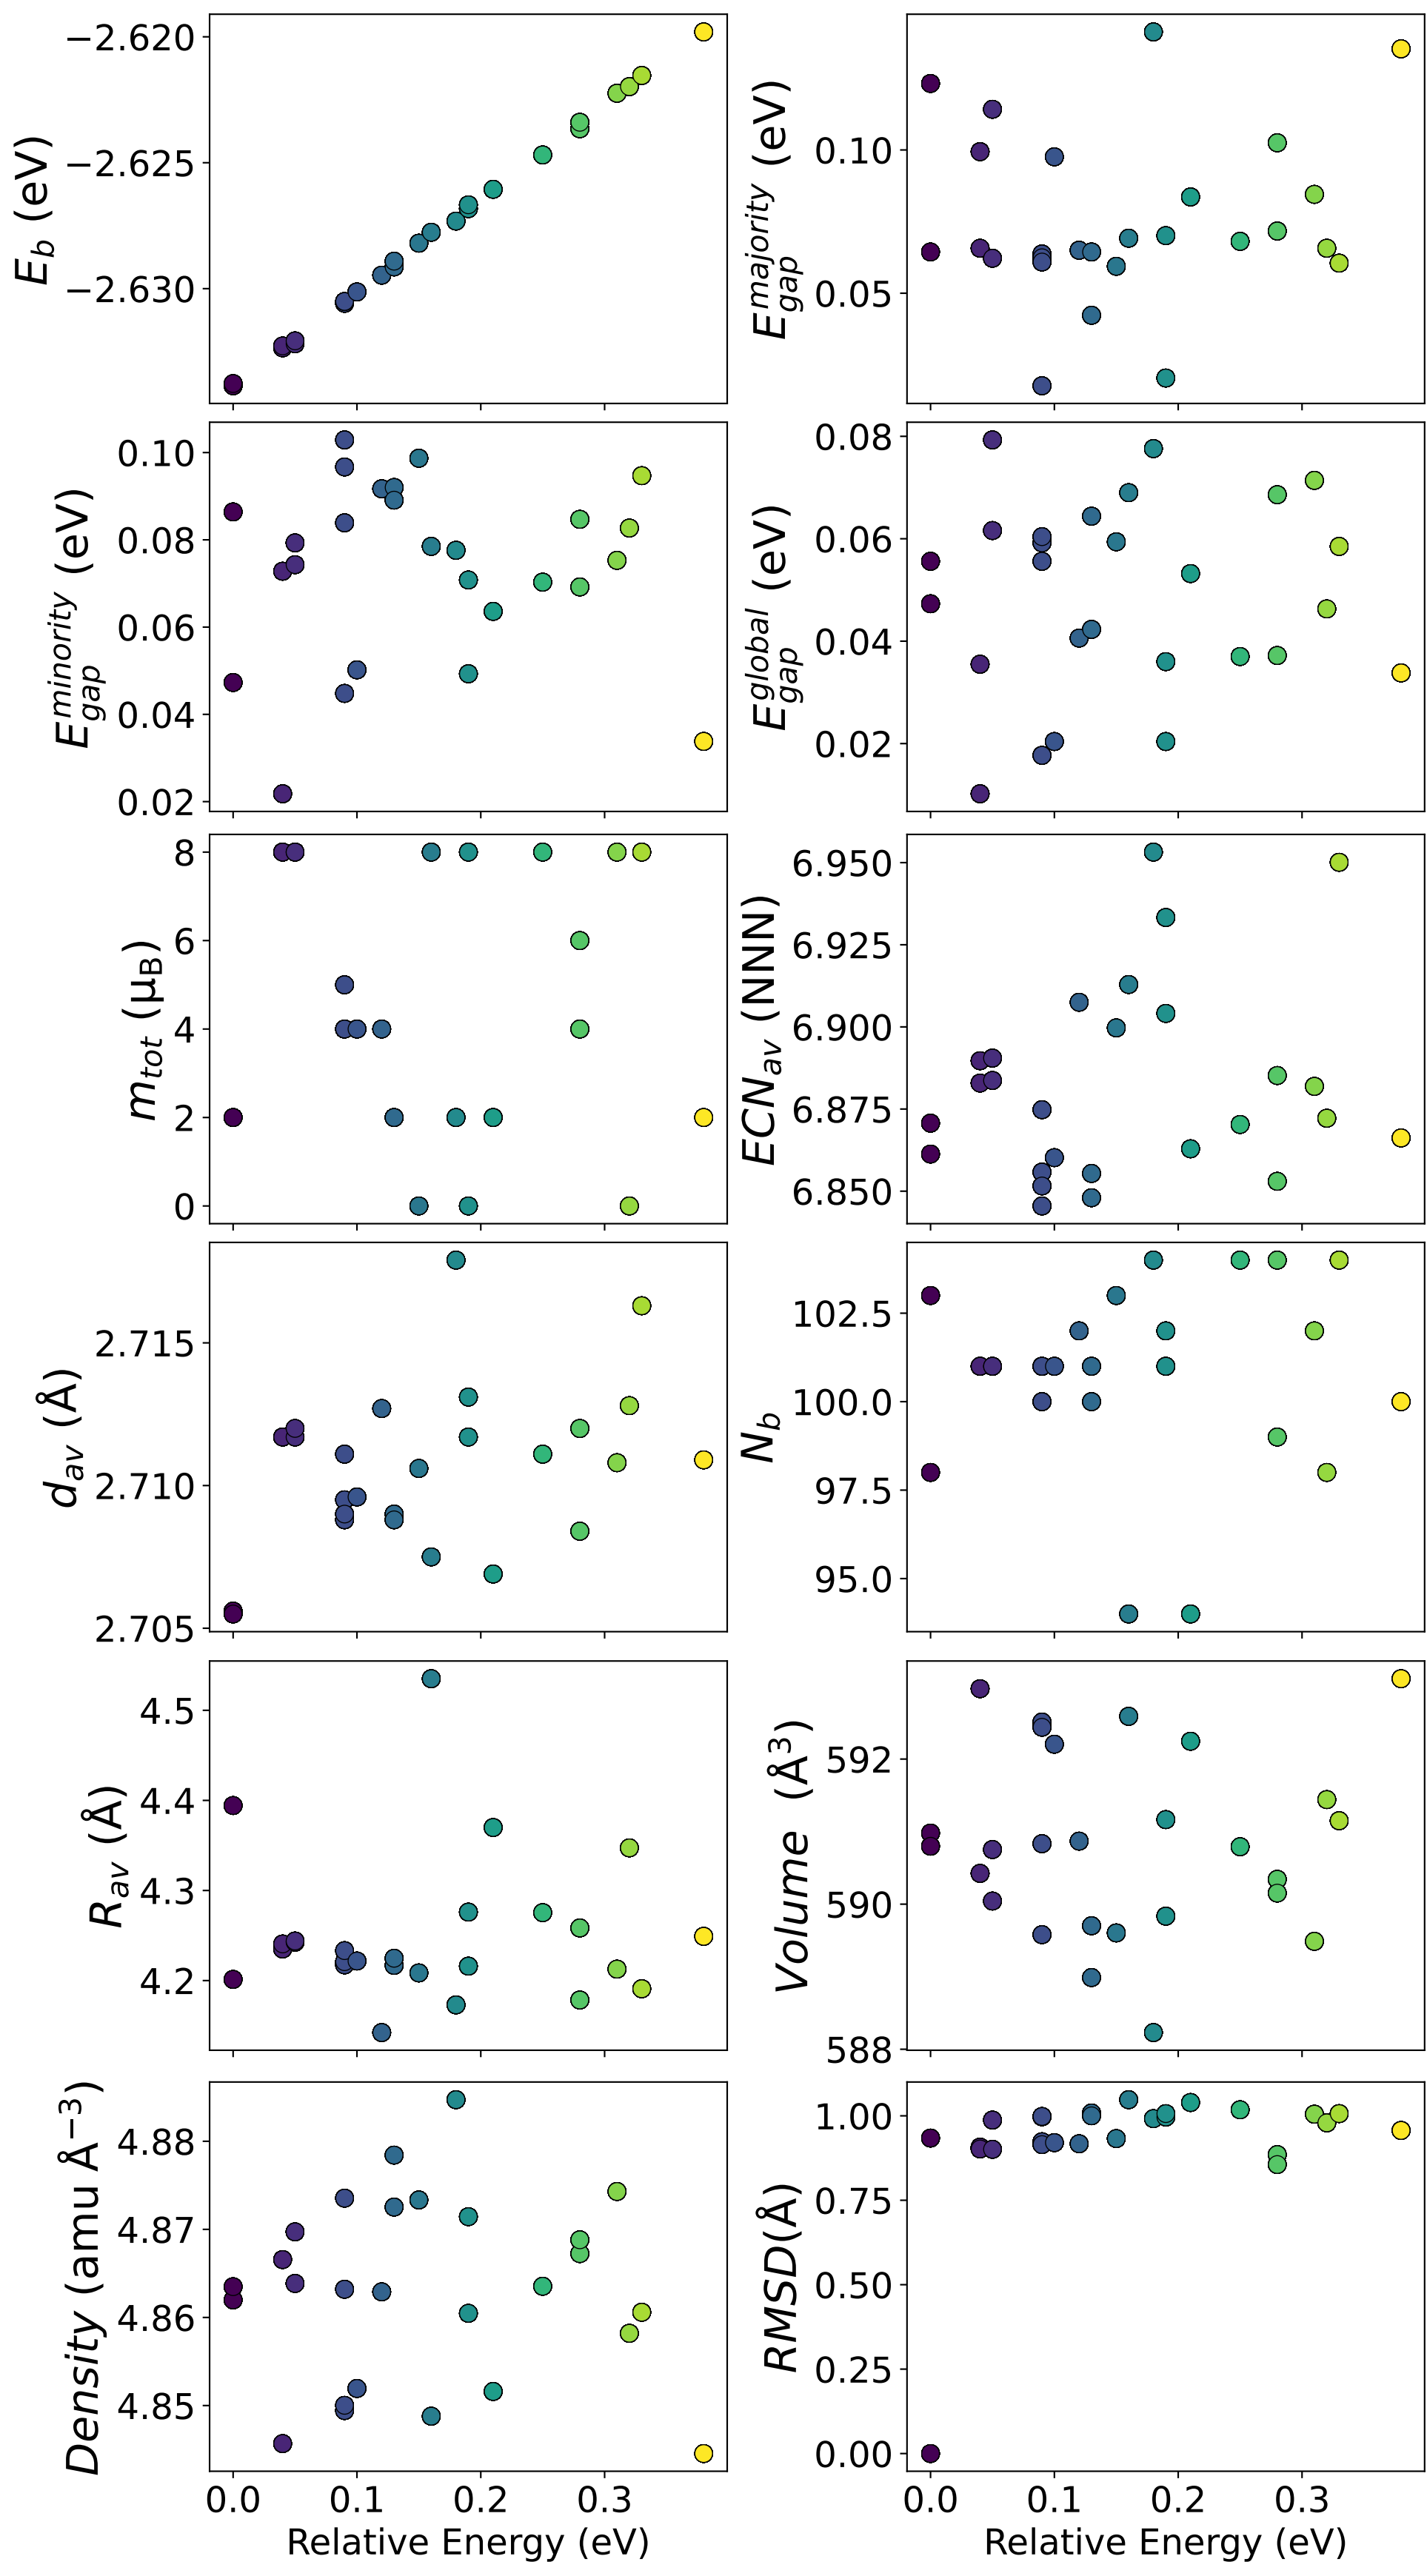

Supplement: d4cp00672k1.zip [file d4cp00672k1.zip]

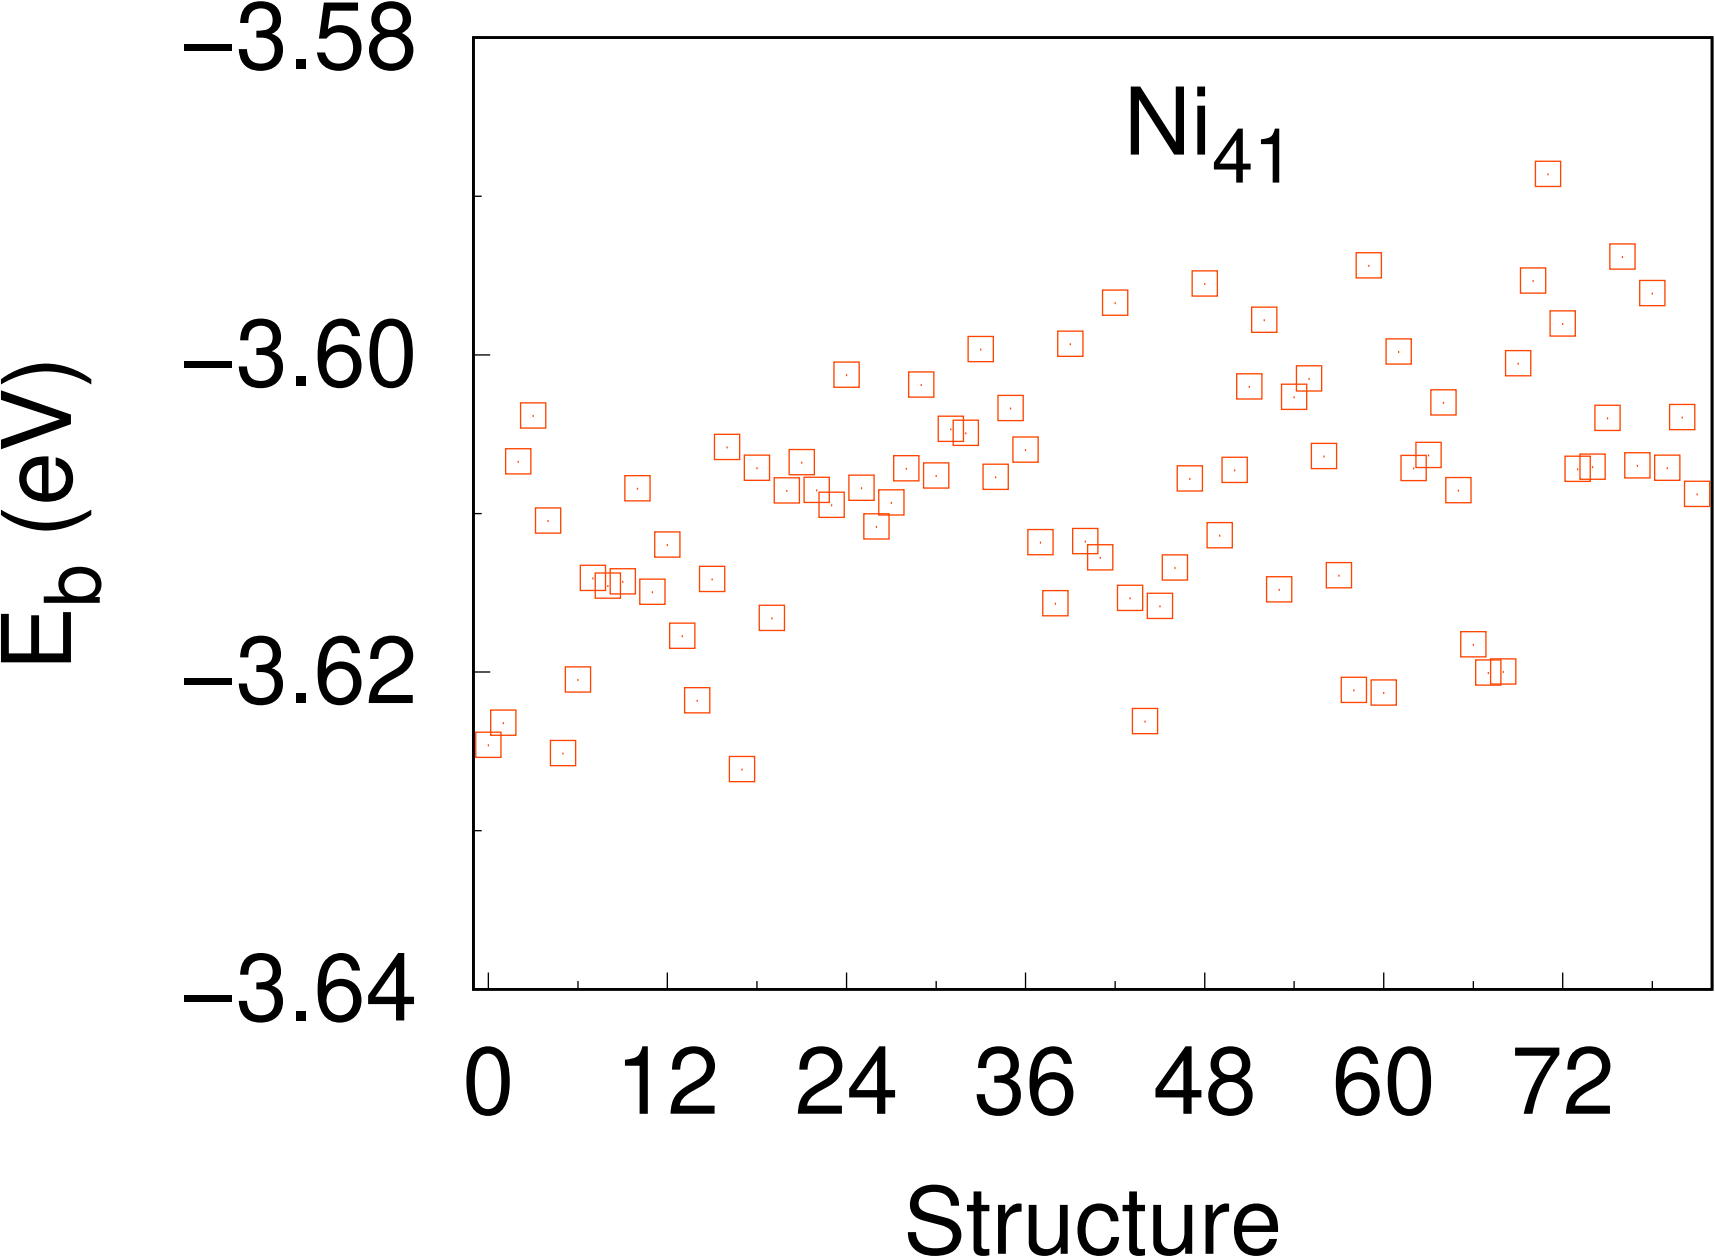

Supplement: d4cp00672k1.zip [file d4cp00672k1.zip]

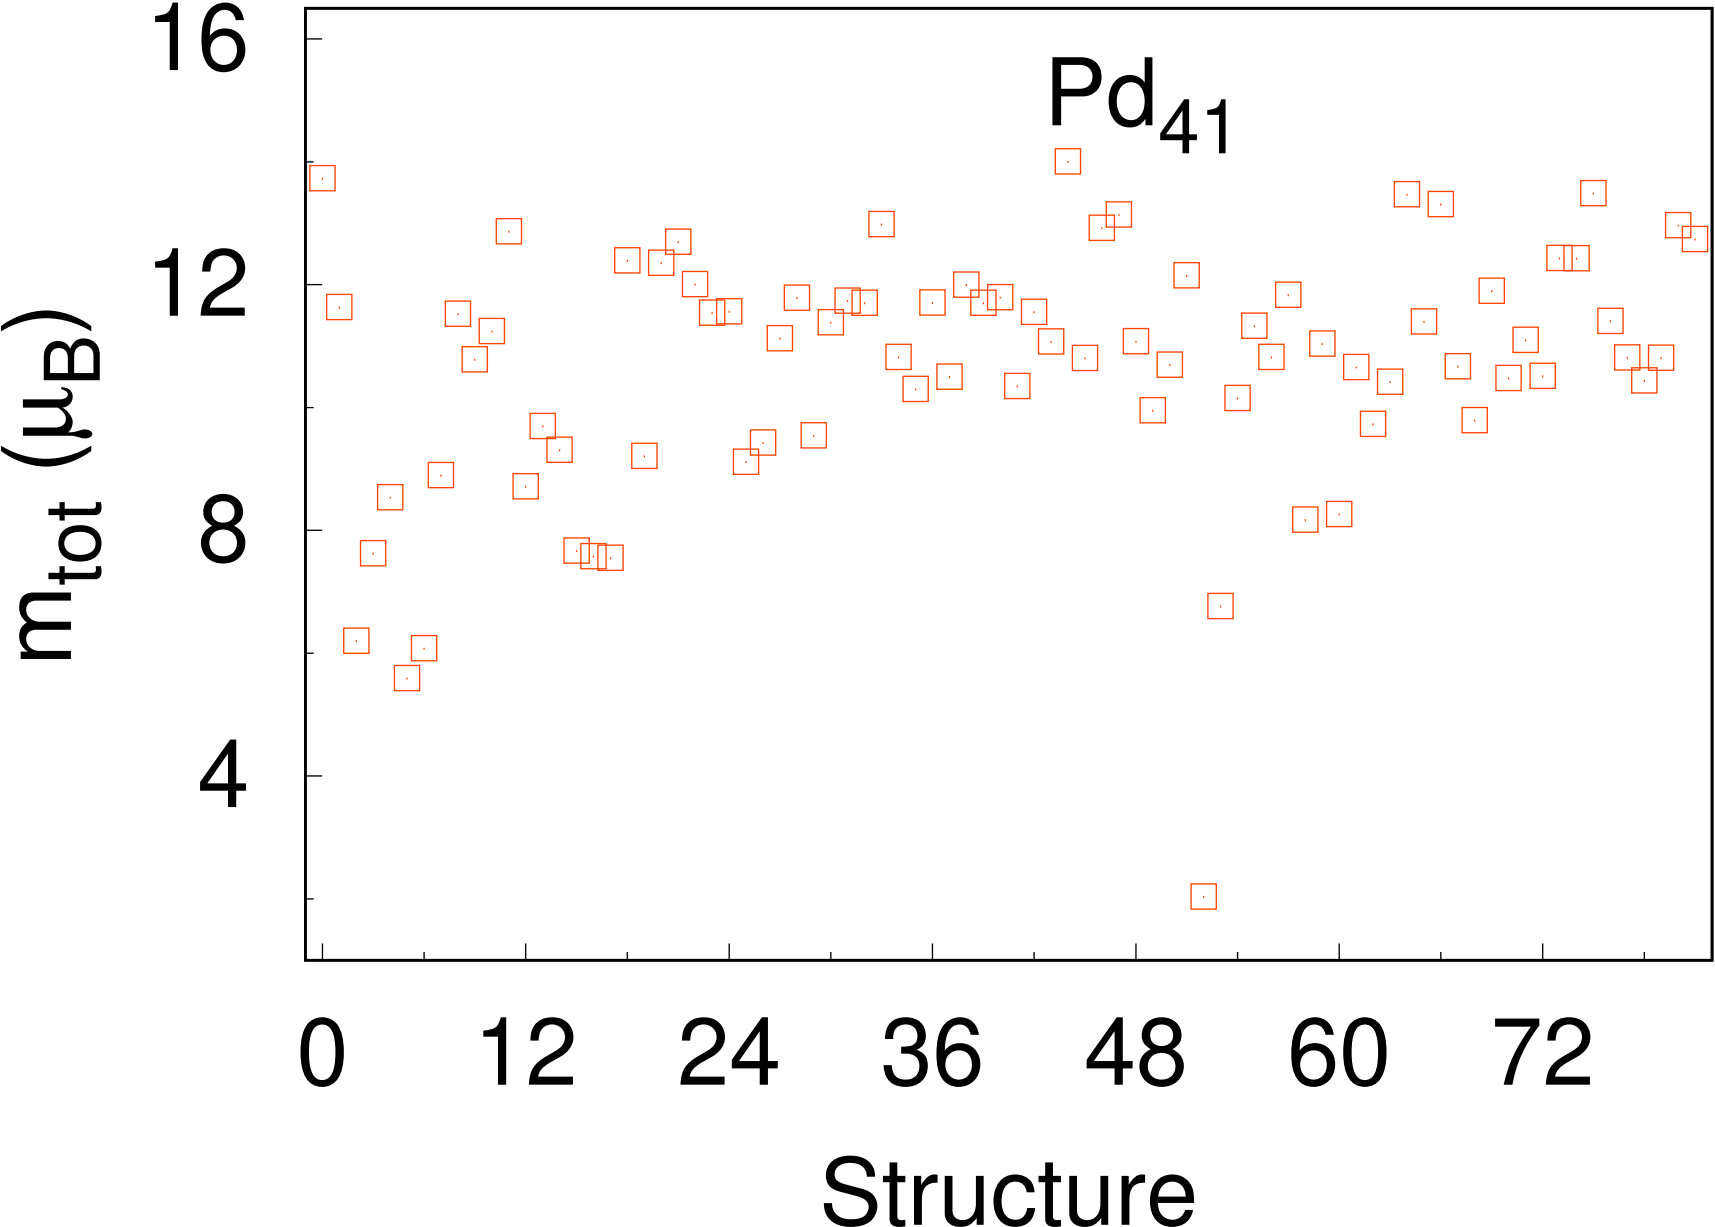

Supplement: d4cp00672k1.zip [file d4cp00672k1.zip]

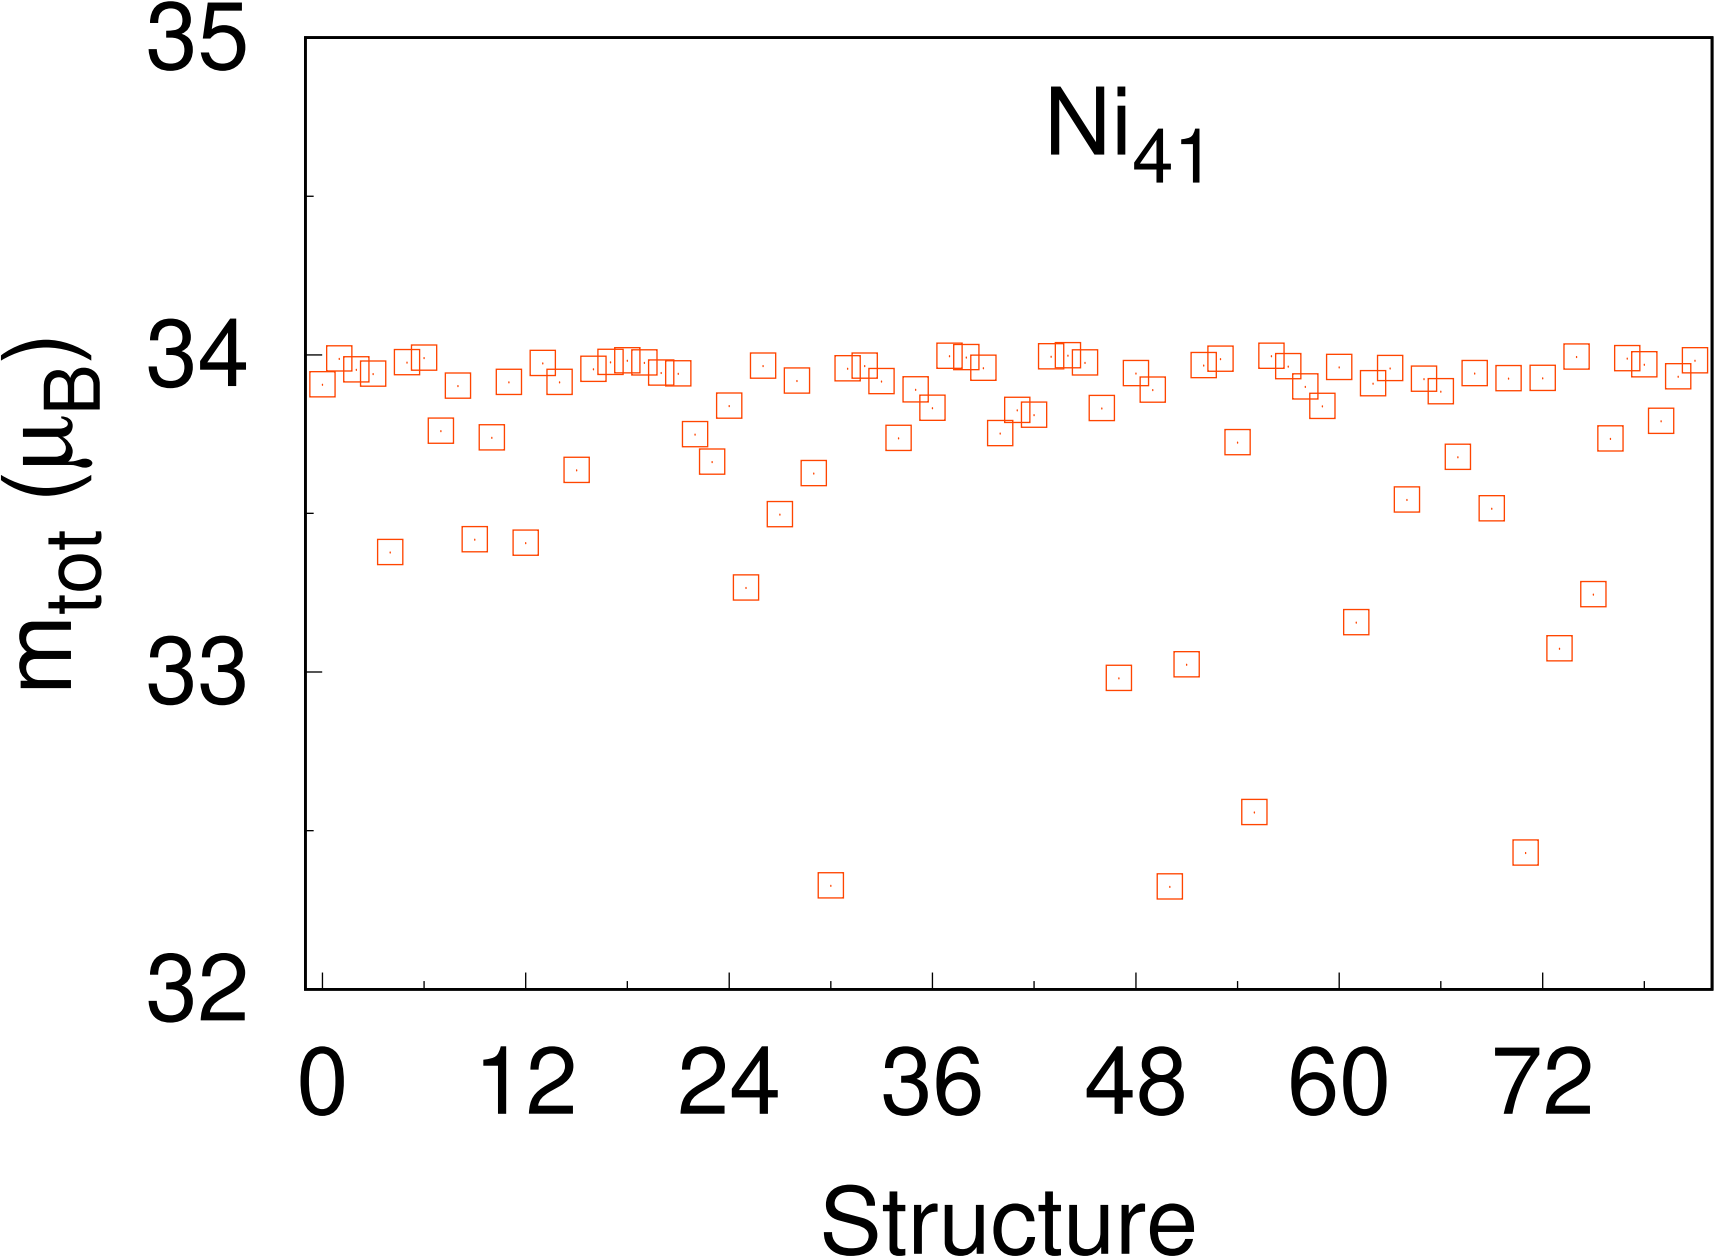

Supplement: d4cp00672k1.zip [file d4cp00672k1.zip]

△ 13 Atoms    □ 27 Atoms    ◇ 41 Atoms    — Linear Regression

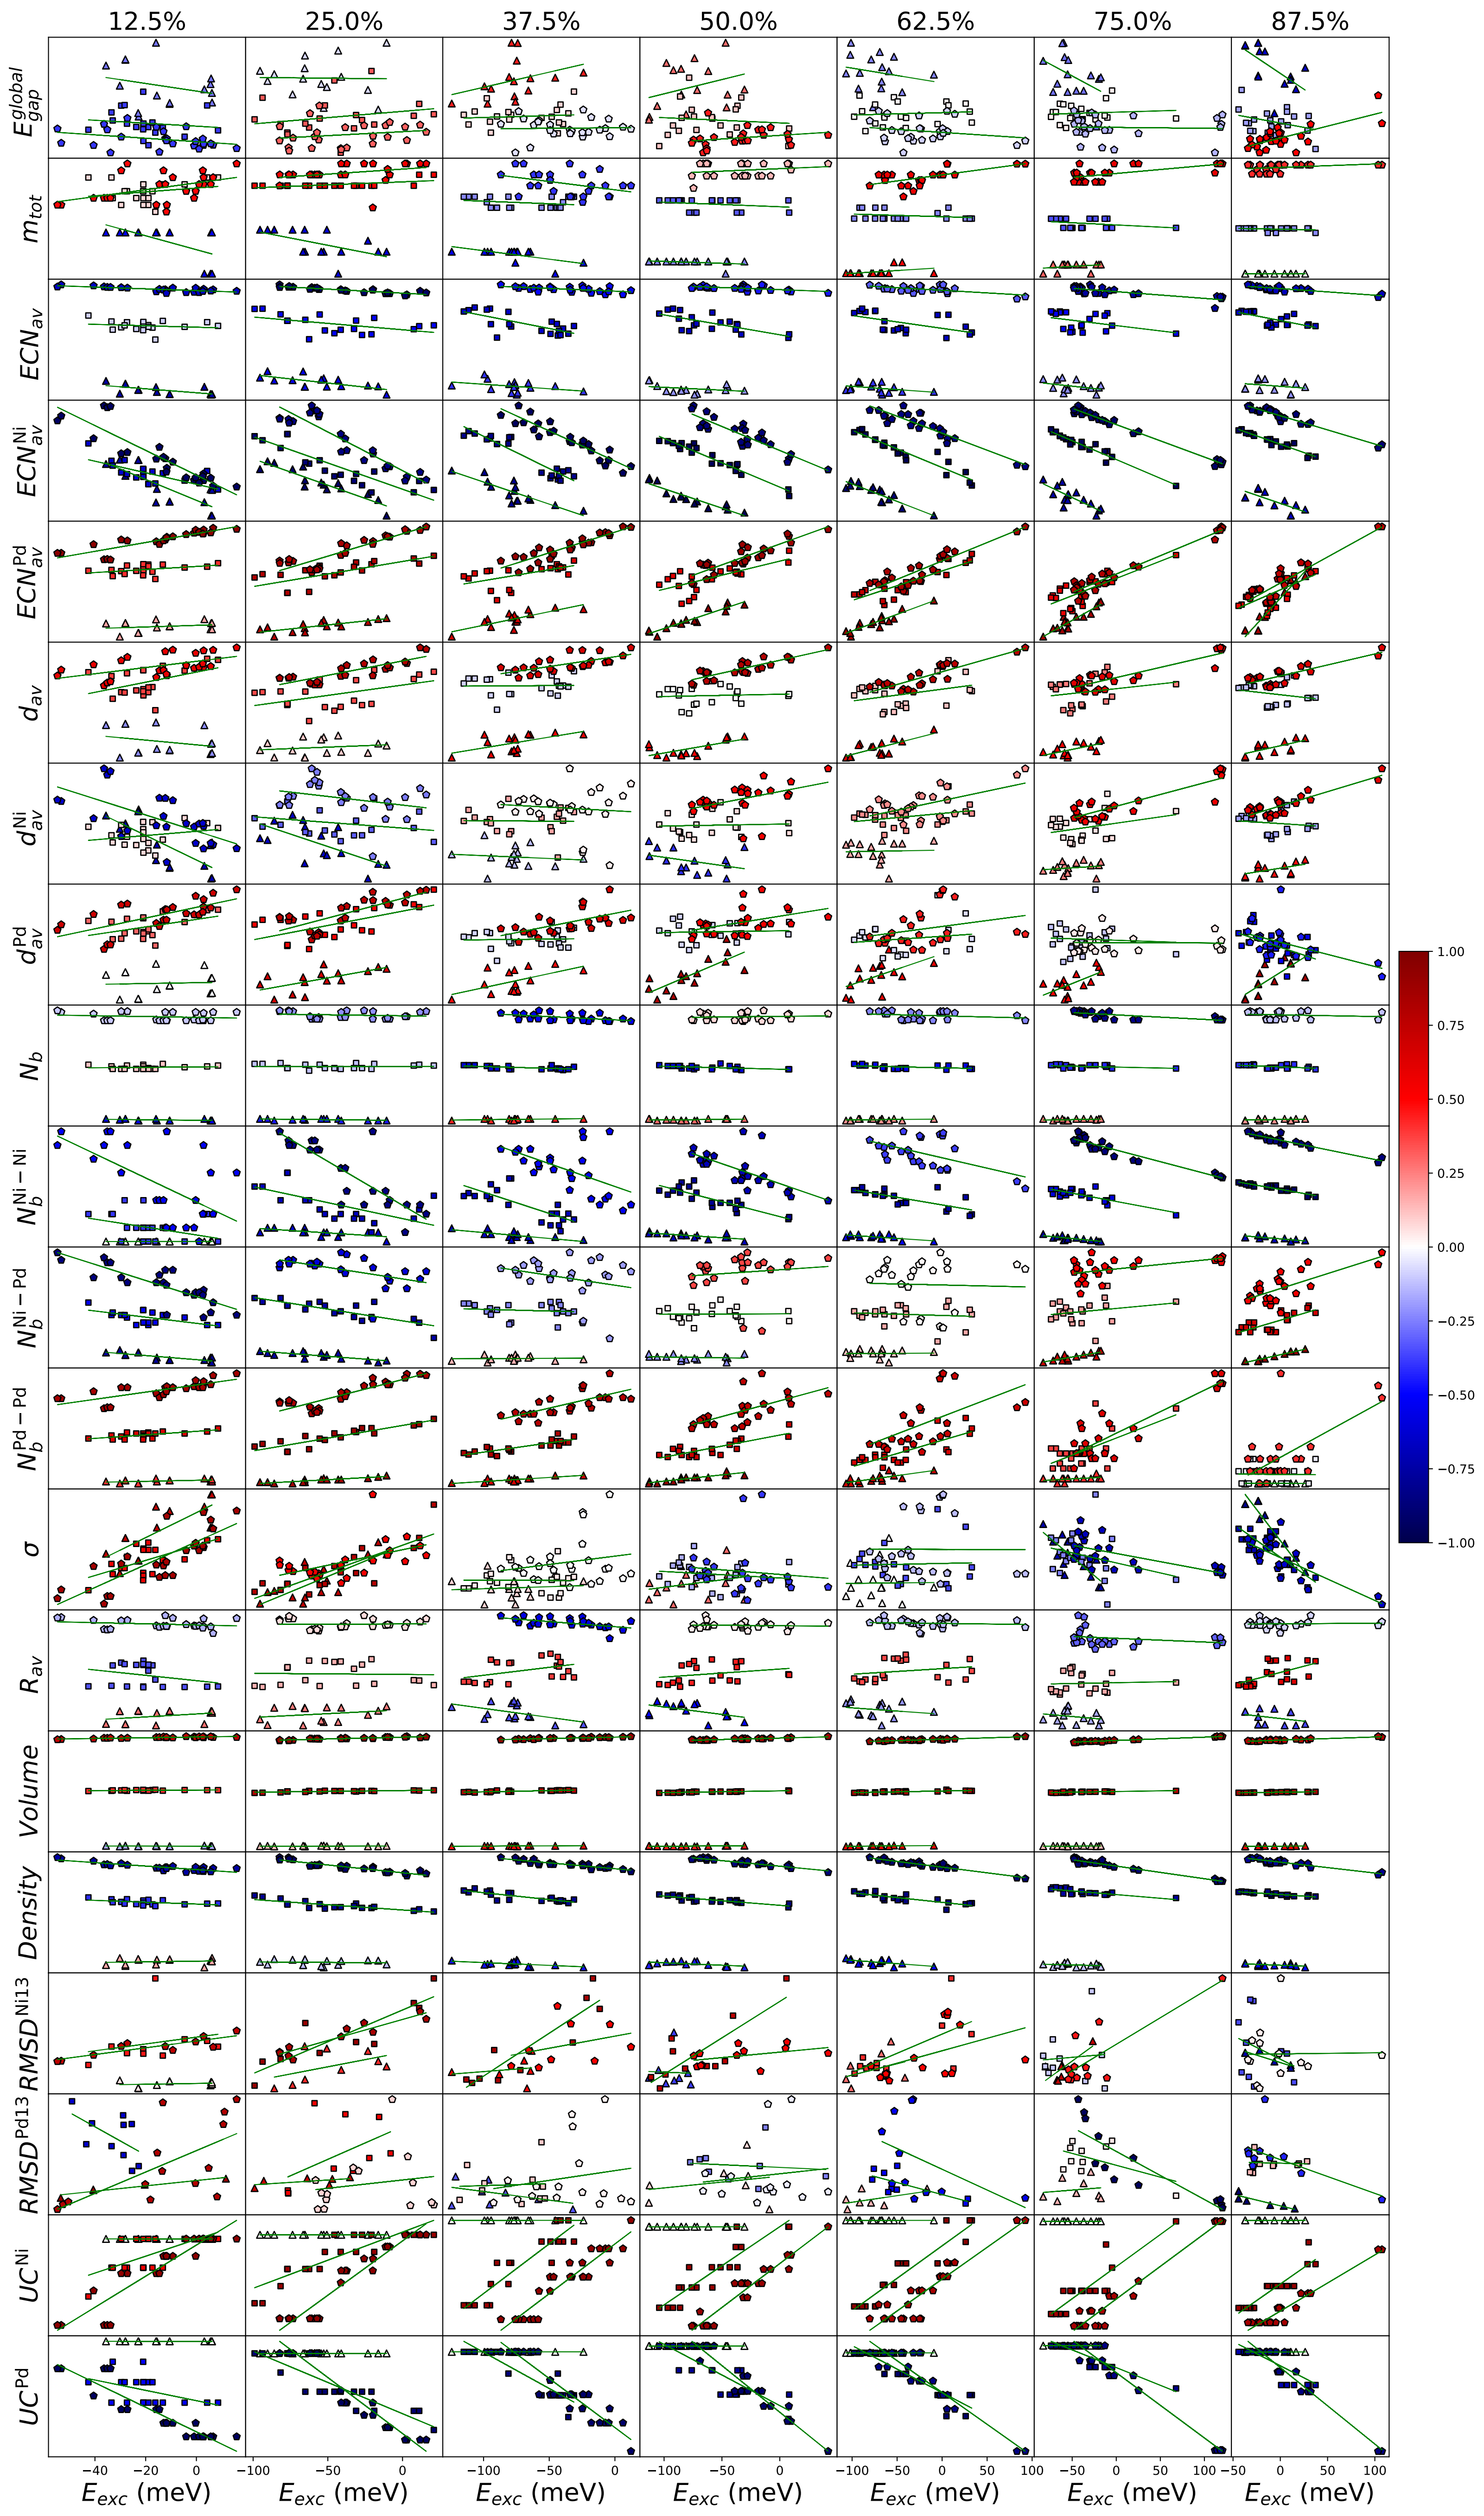

Supplement: d4cp00672k1.zip [file d4cp00672k1.zip]

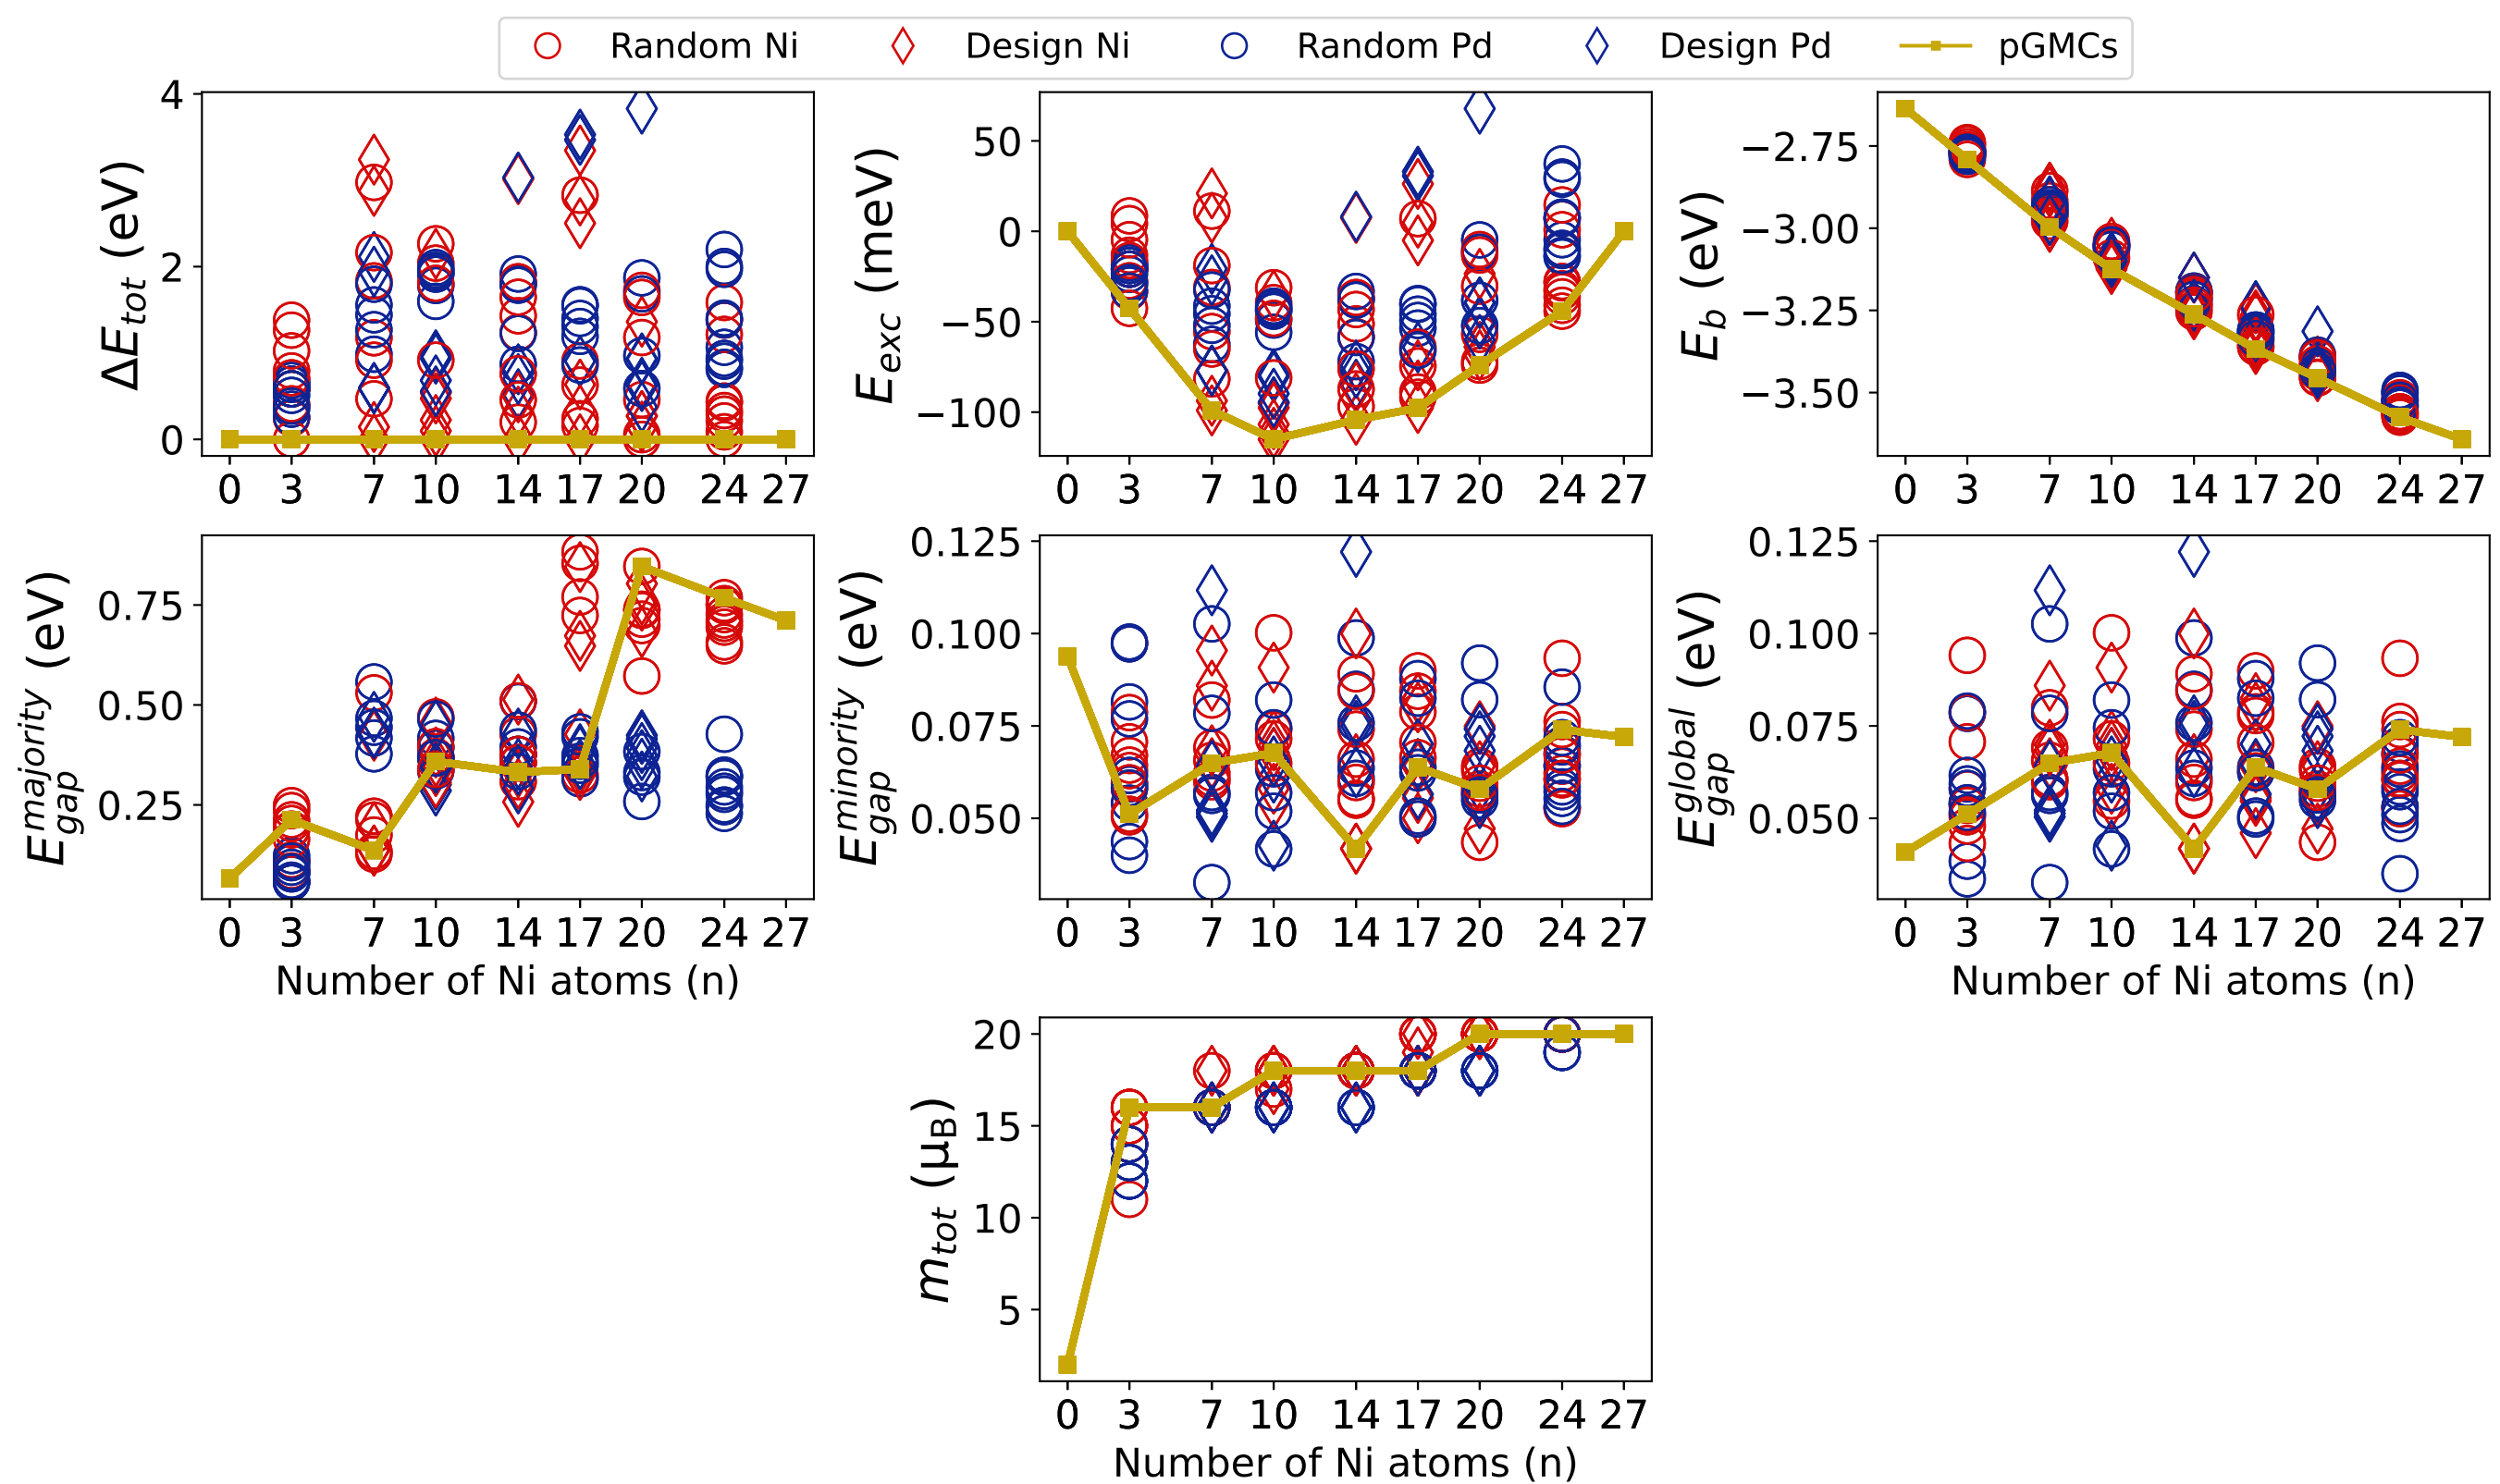

Supplement: d4cp00672k1.zip [file d4cp00672k1.zip]

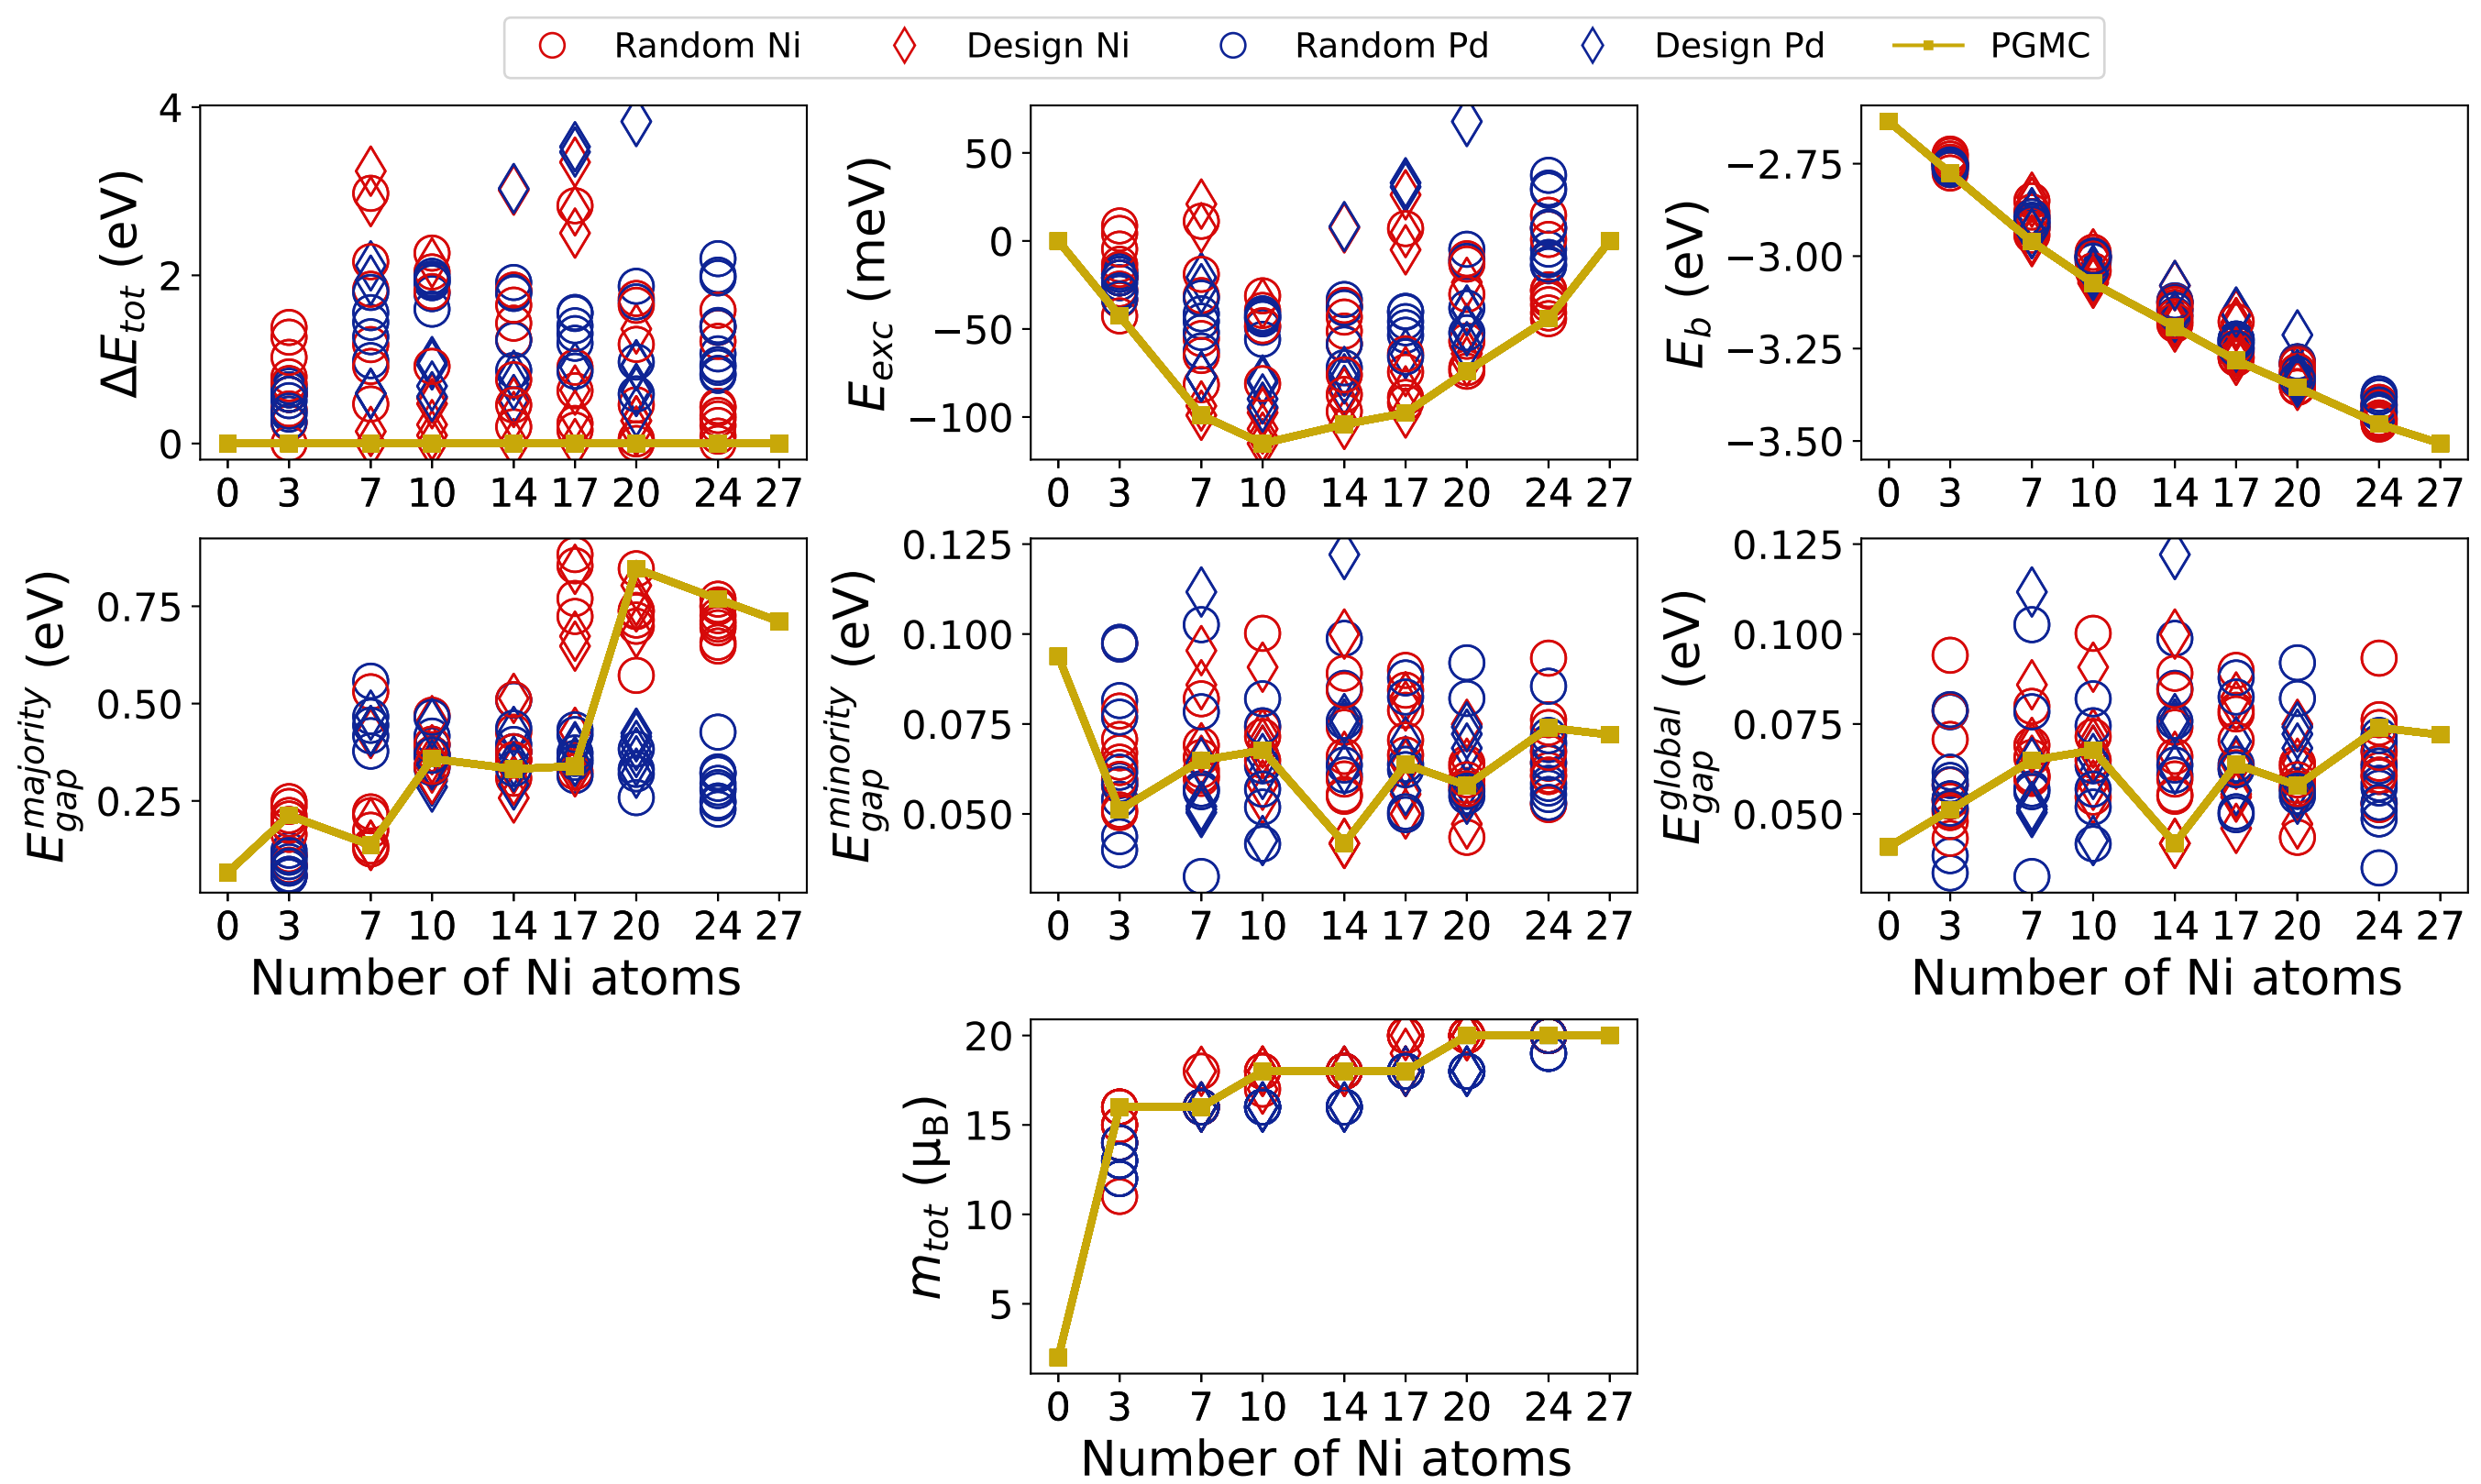

Supplement: d4cp00672k1.zip [file d4cp00672k1.zip]

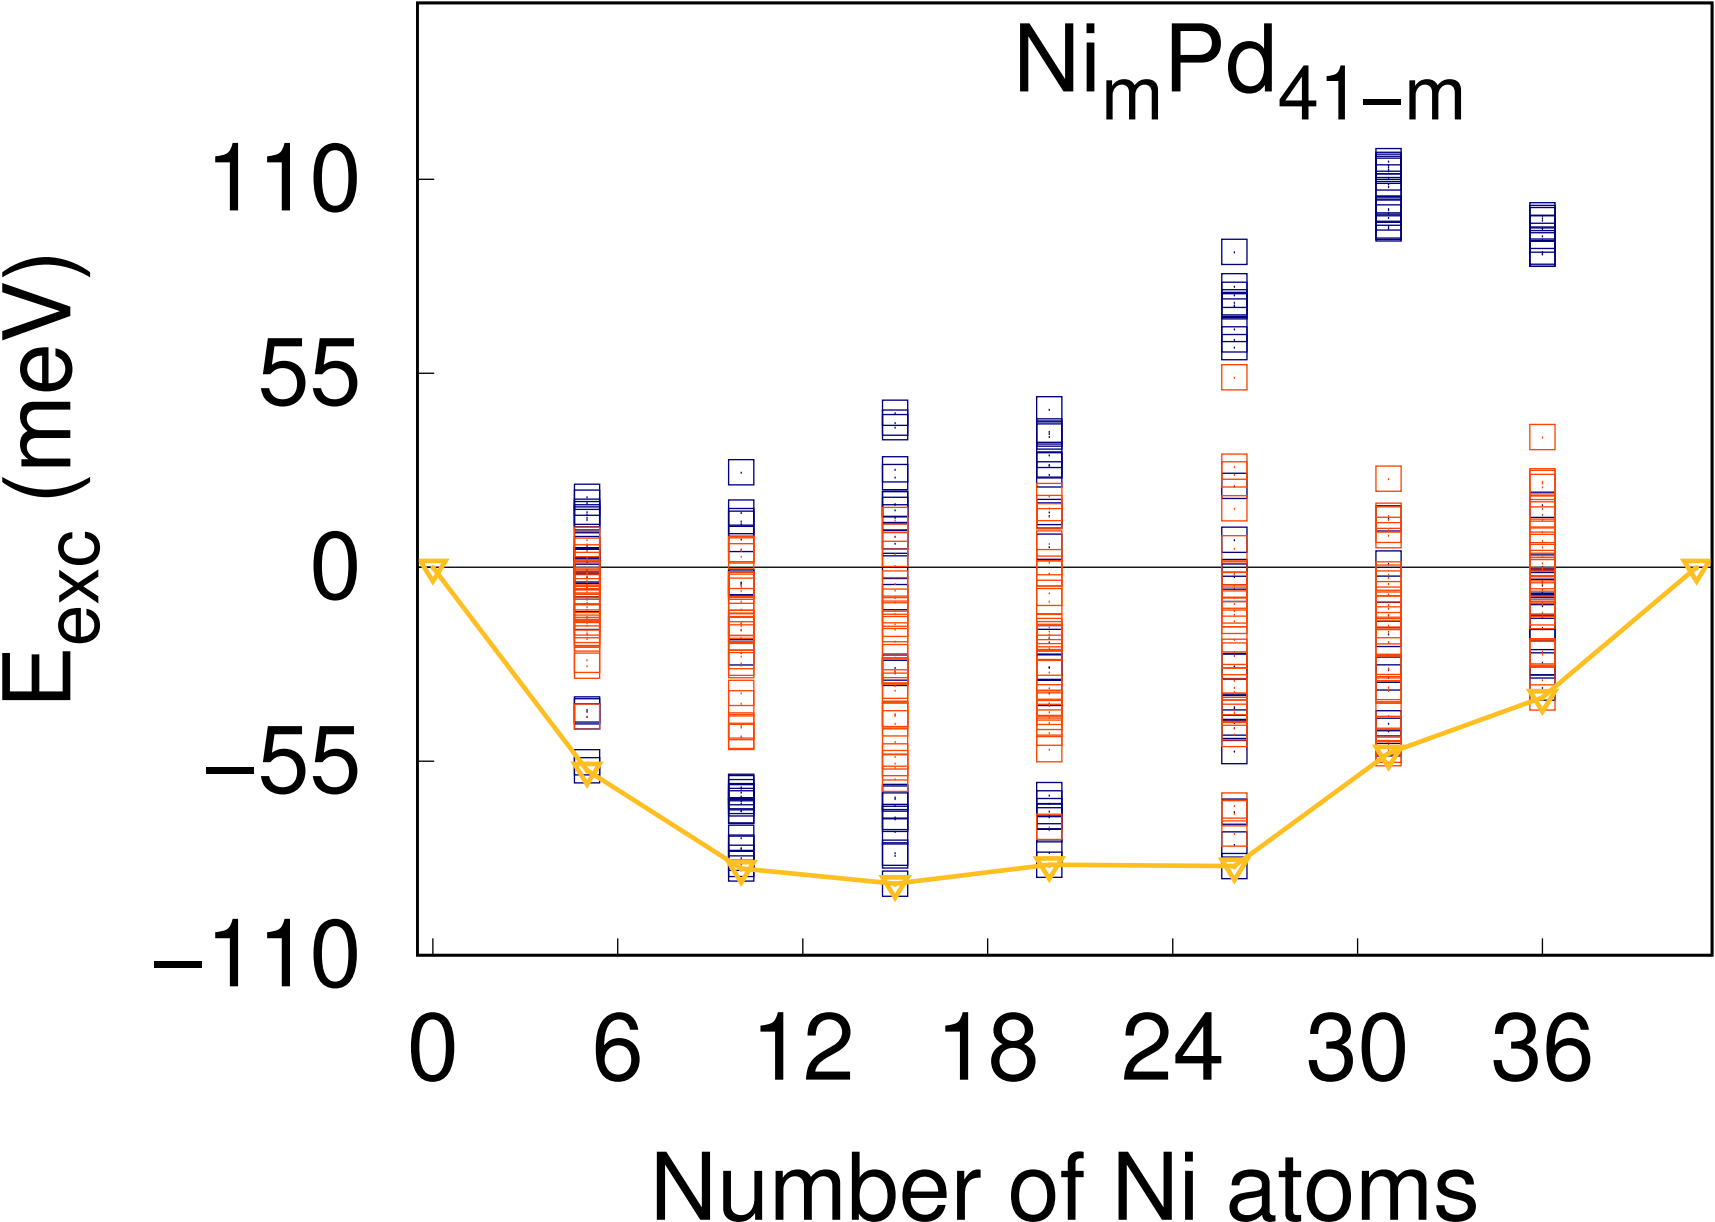

Supplement: d4cp00672k1.zip [file d4cp00672k1.zip]

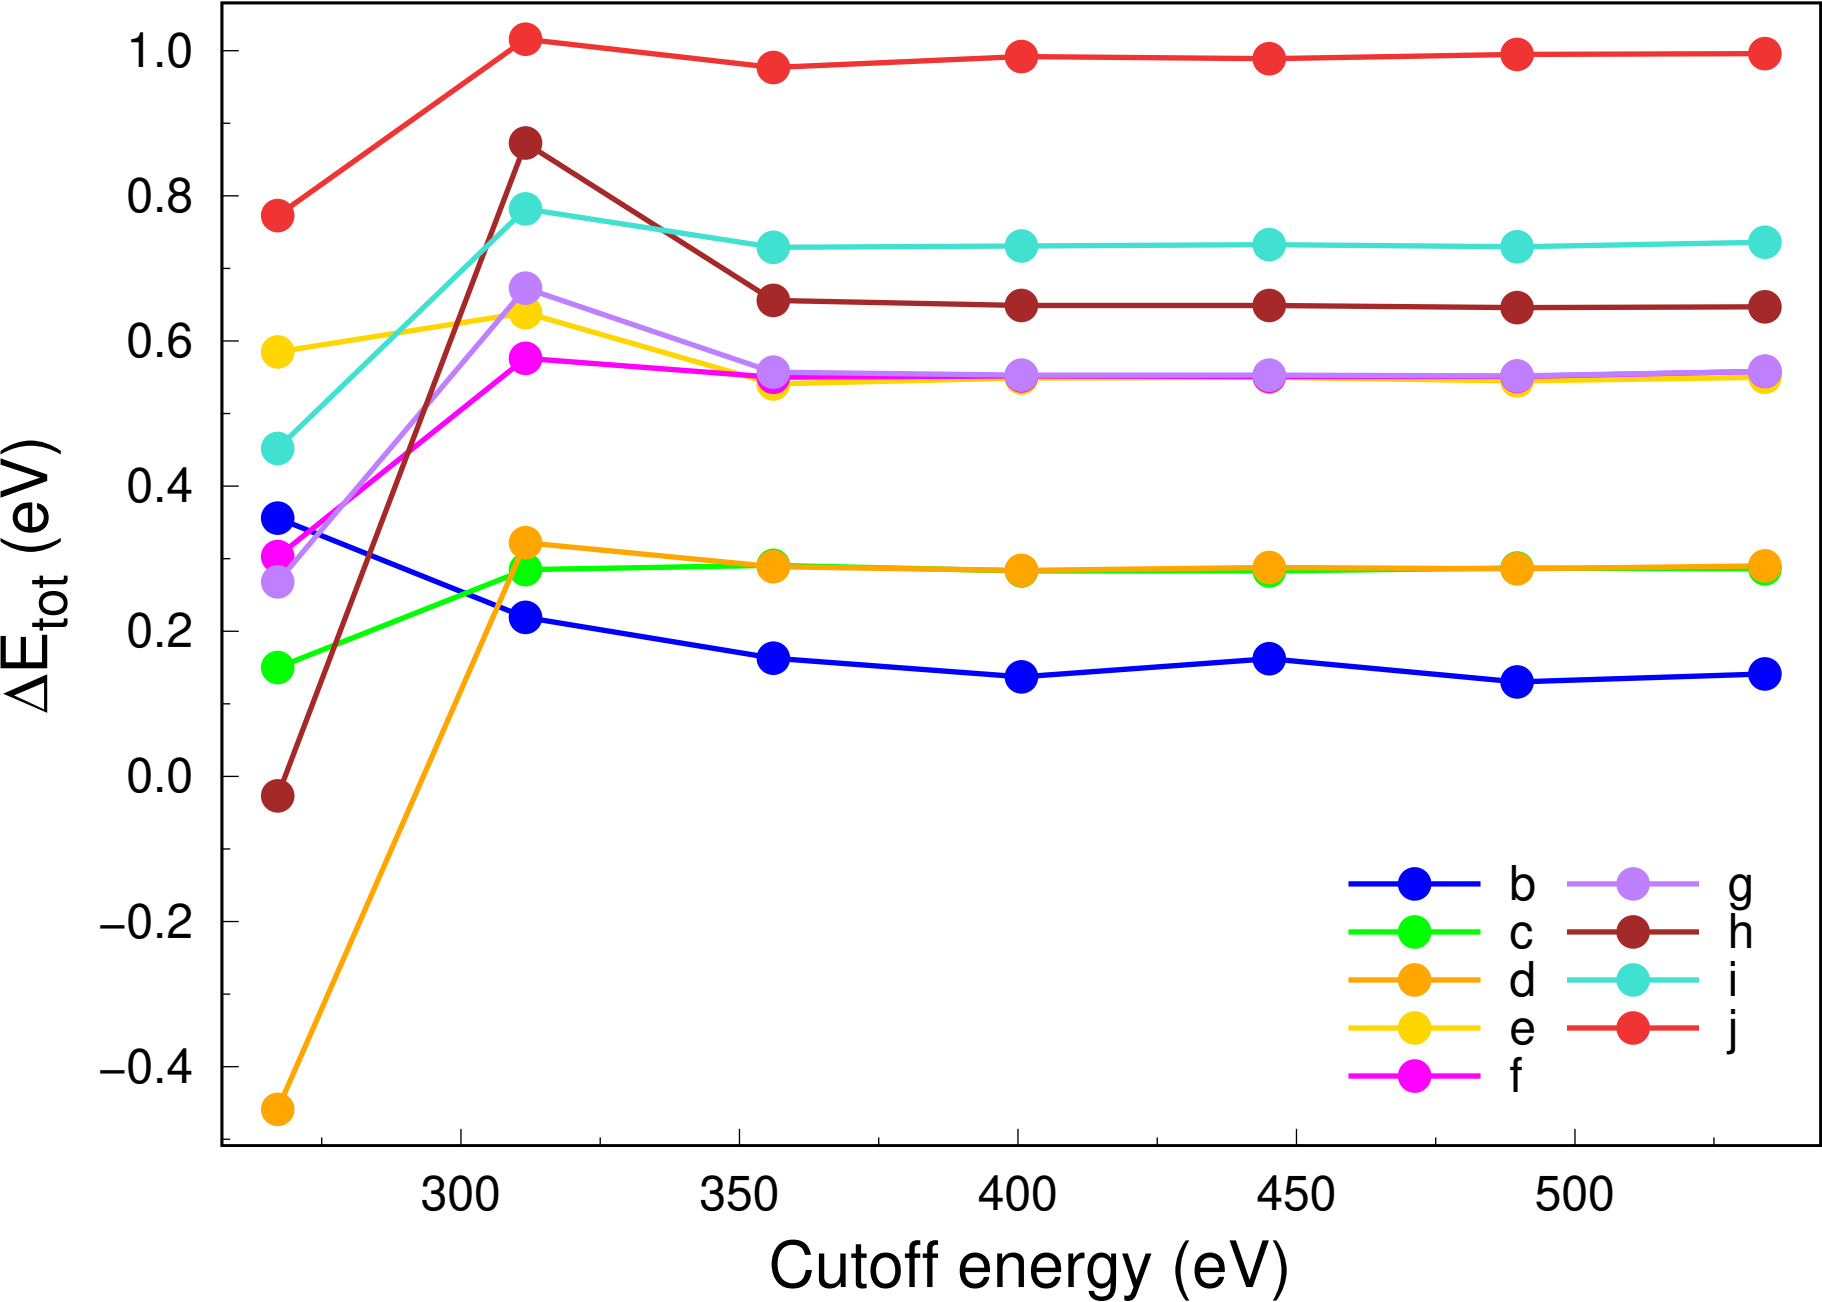

Supplement: d4cp00672k1.zip [file d4cp00672k1.zip]

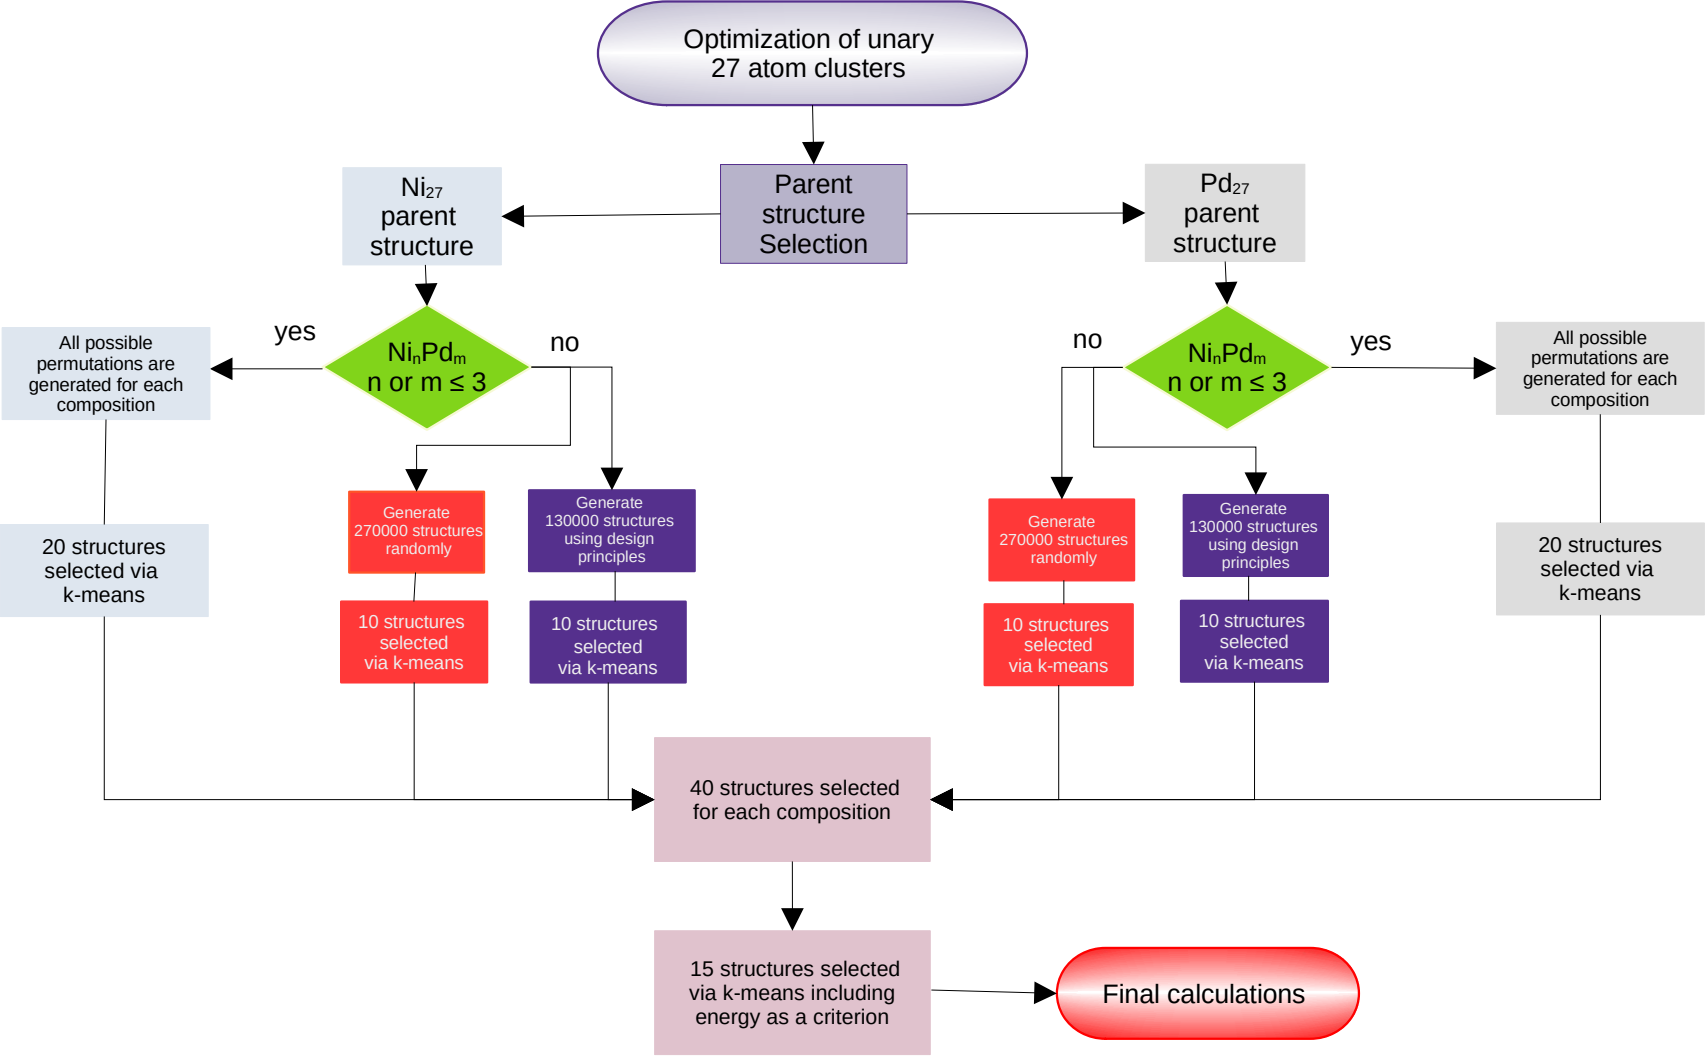

Supplement: d4cp00672k1.zip [file d4cp00672k1.zip]

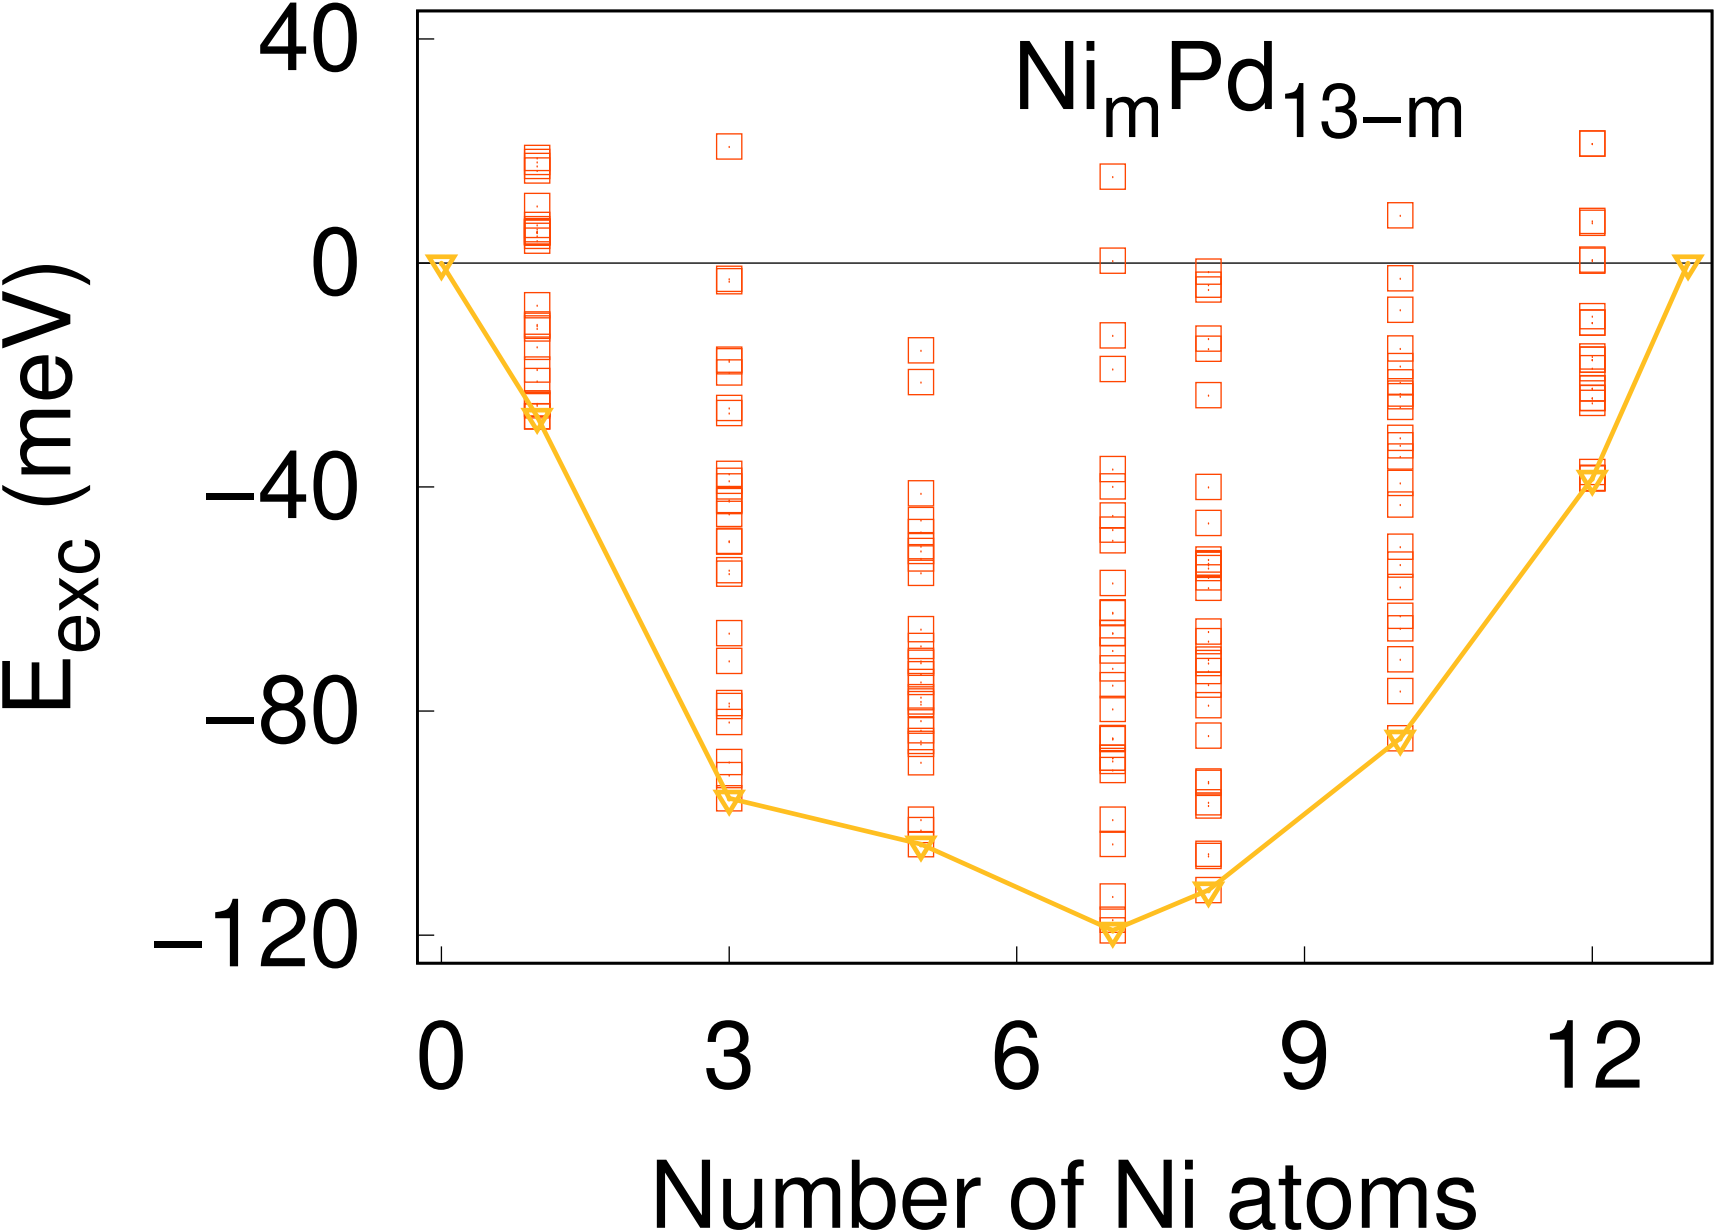

Supplement: d4cp00672k1.zip [file d4cp00672k1.zip]

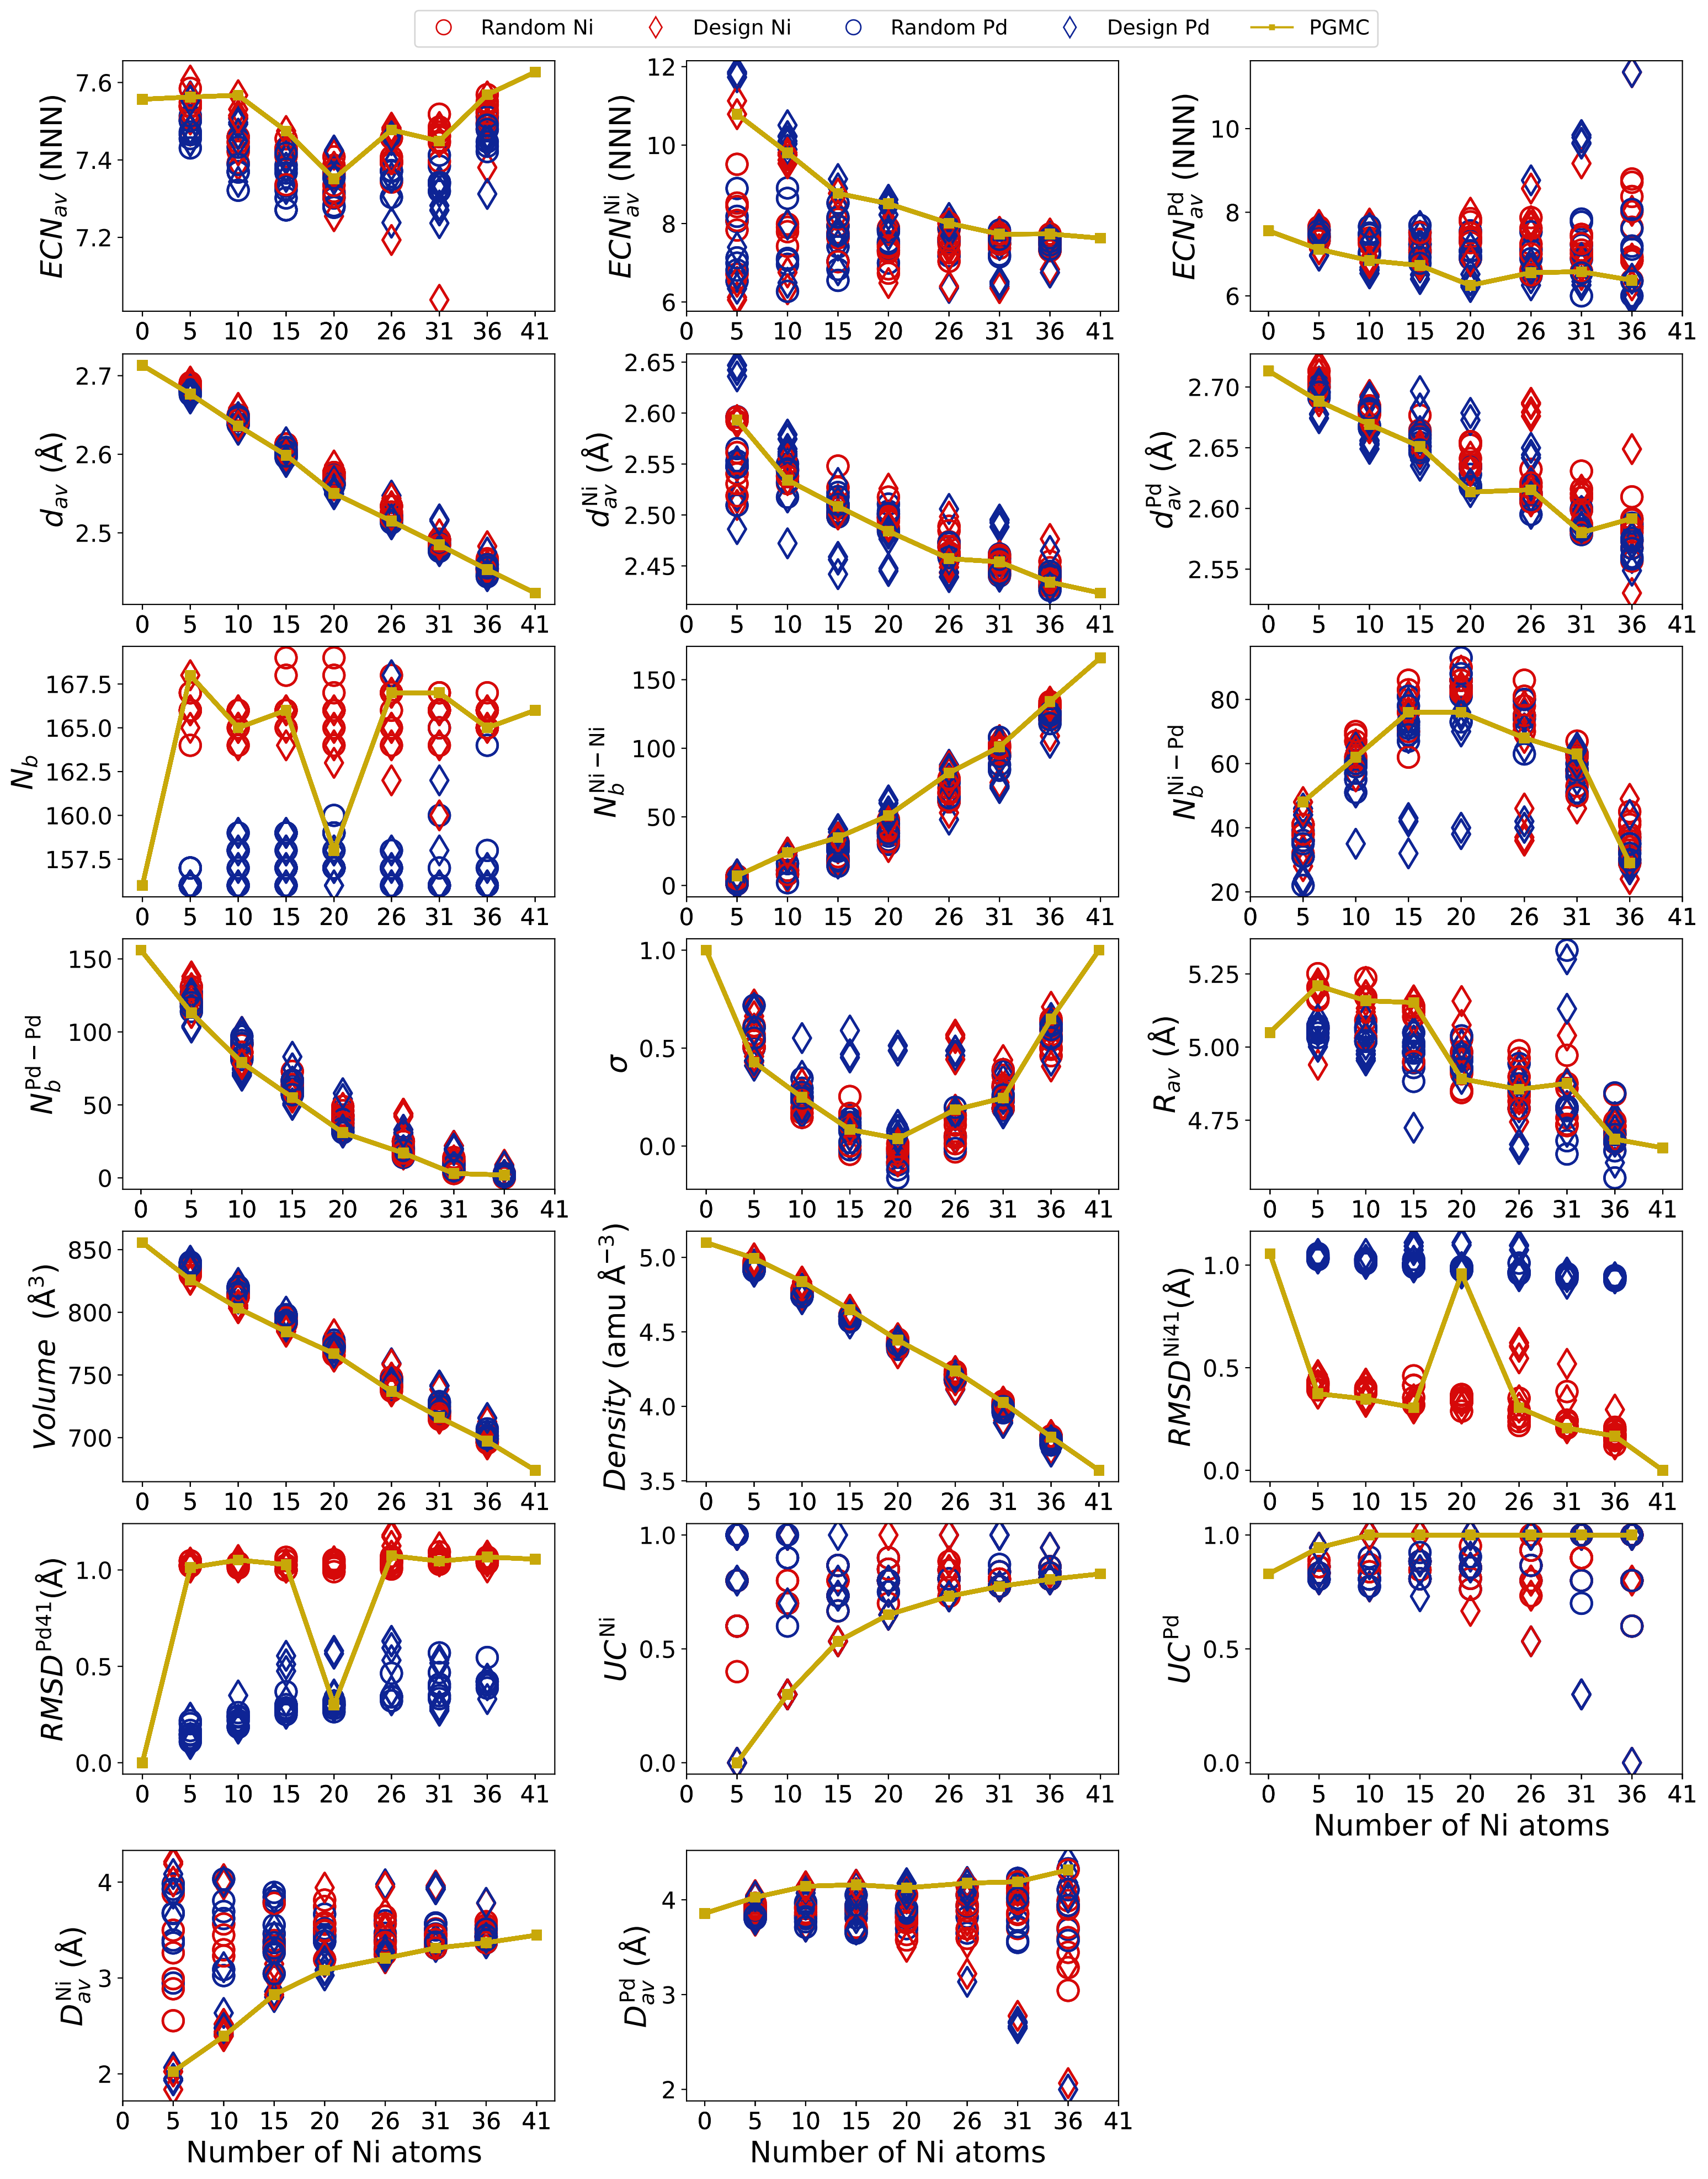

Supplement: d4cp00672k1.zip [file d4cp00672k1.zip]

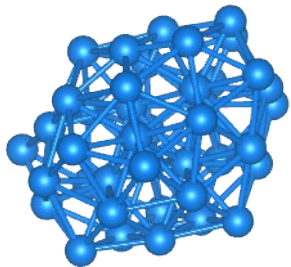

Ni<sub>41</sub>

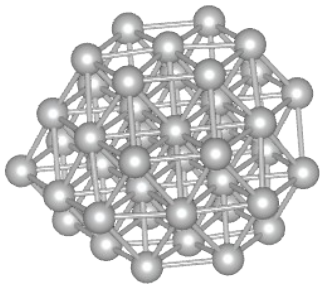

Pd<sub>41</sub>

Supplement: d4cp00672k1.zip [file d4cp00672k1.zip]

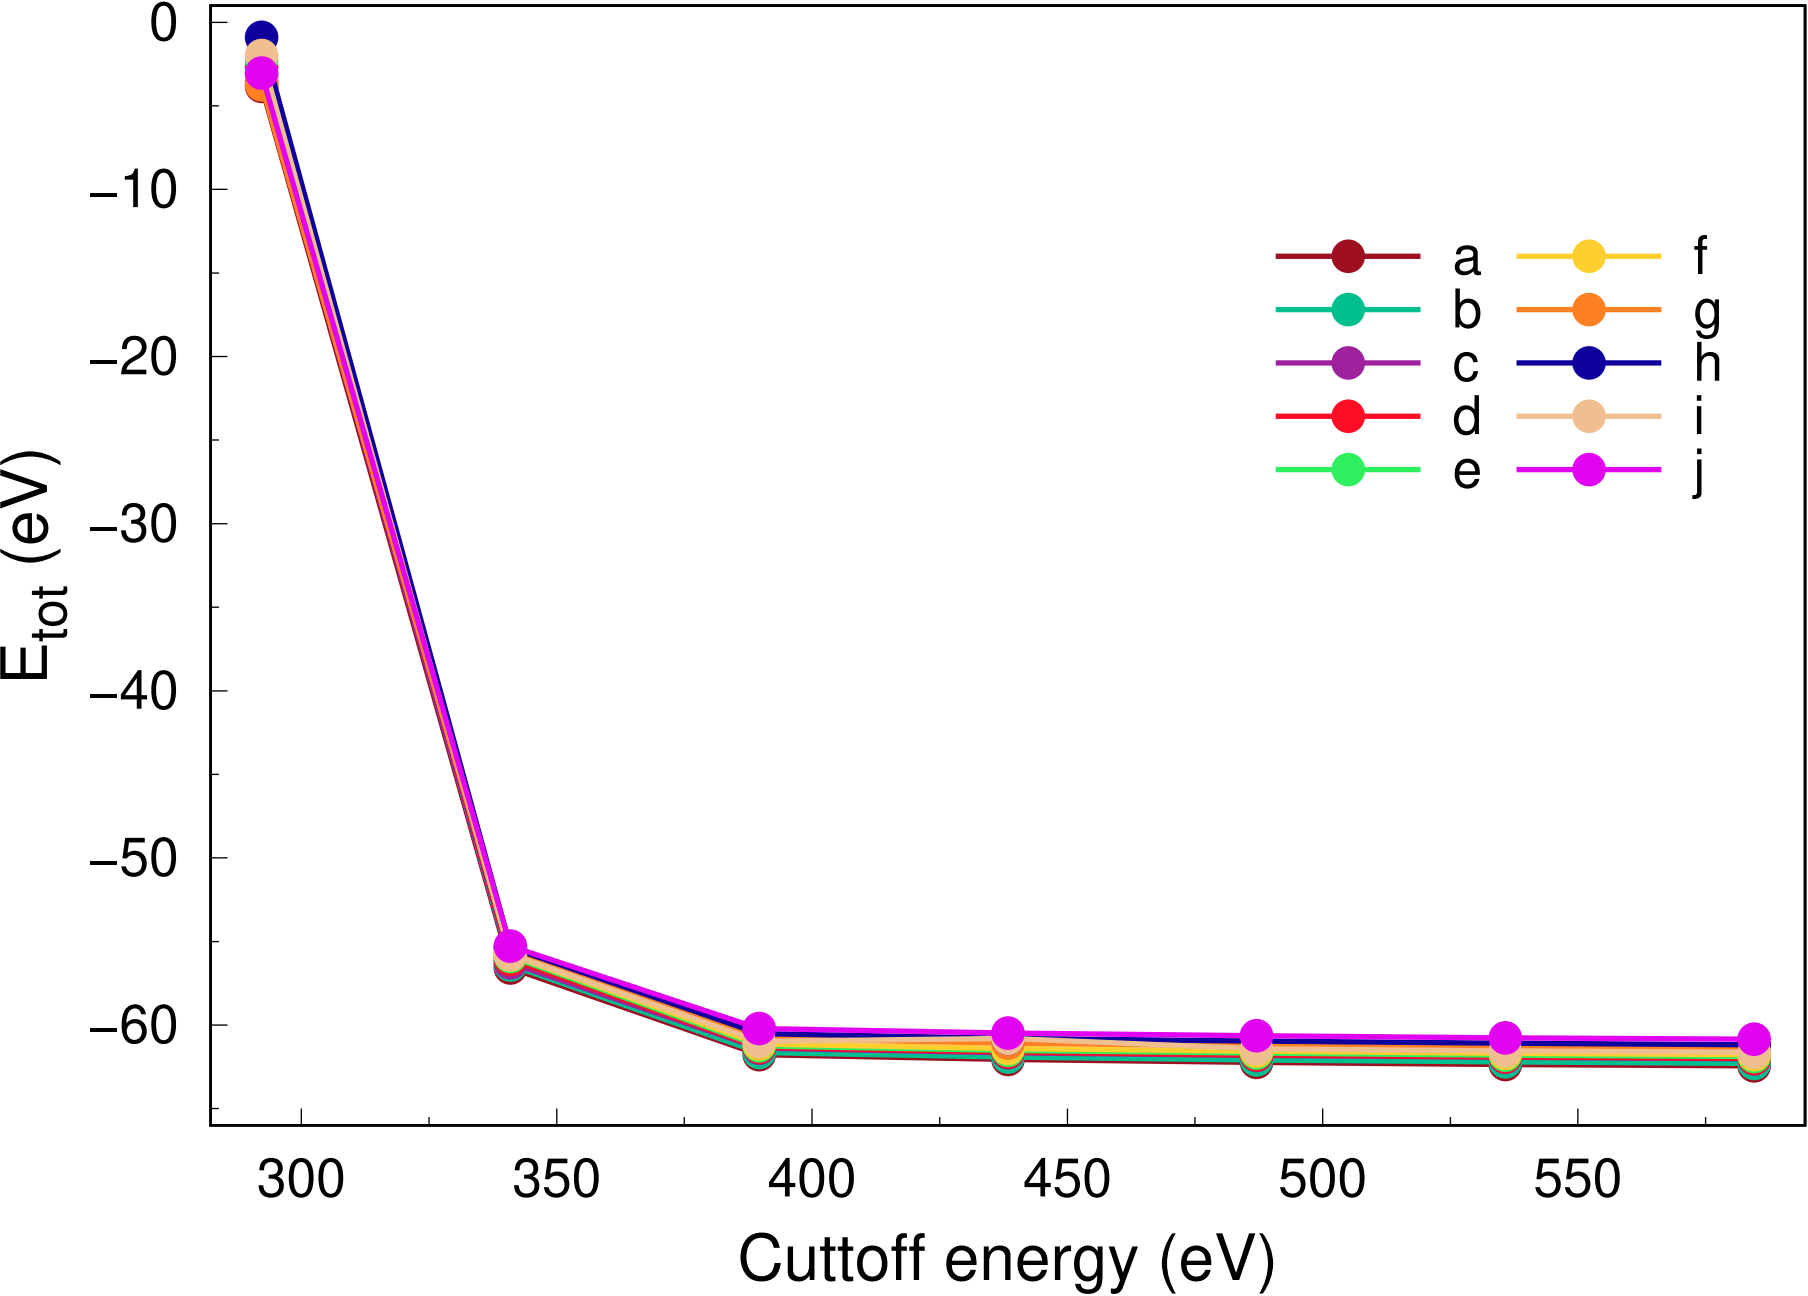

Supplement: d4cp00672k1.zip [file d4cp00672k1.zip]

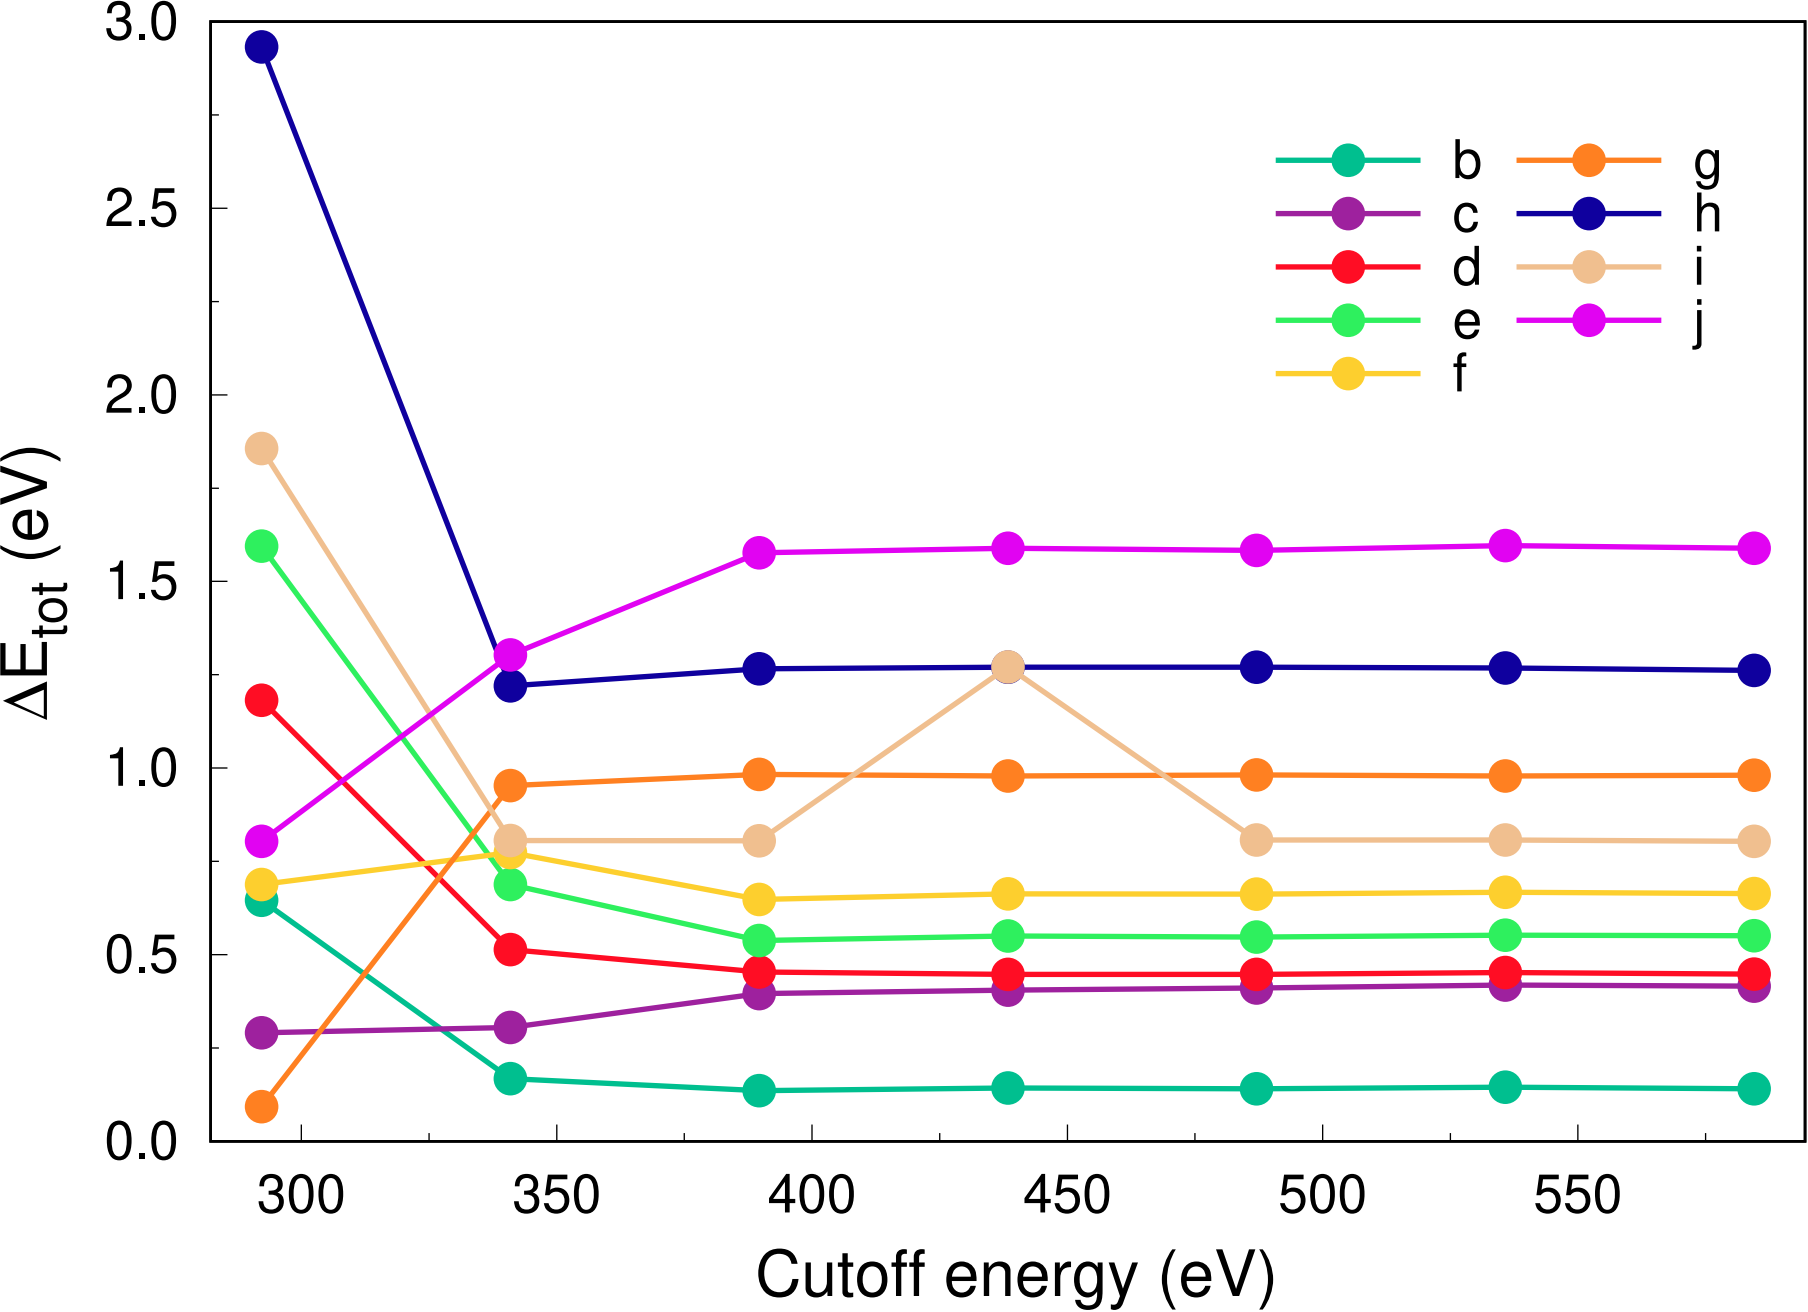

Supplement: d4cp00672k1.zip [file d4cp00672k1.zip]

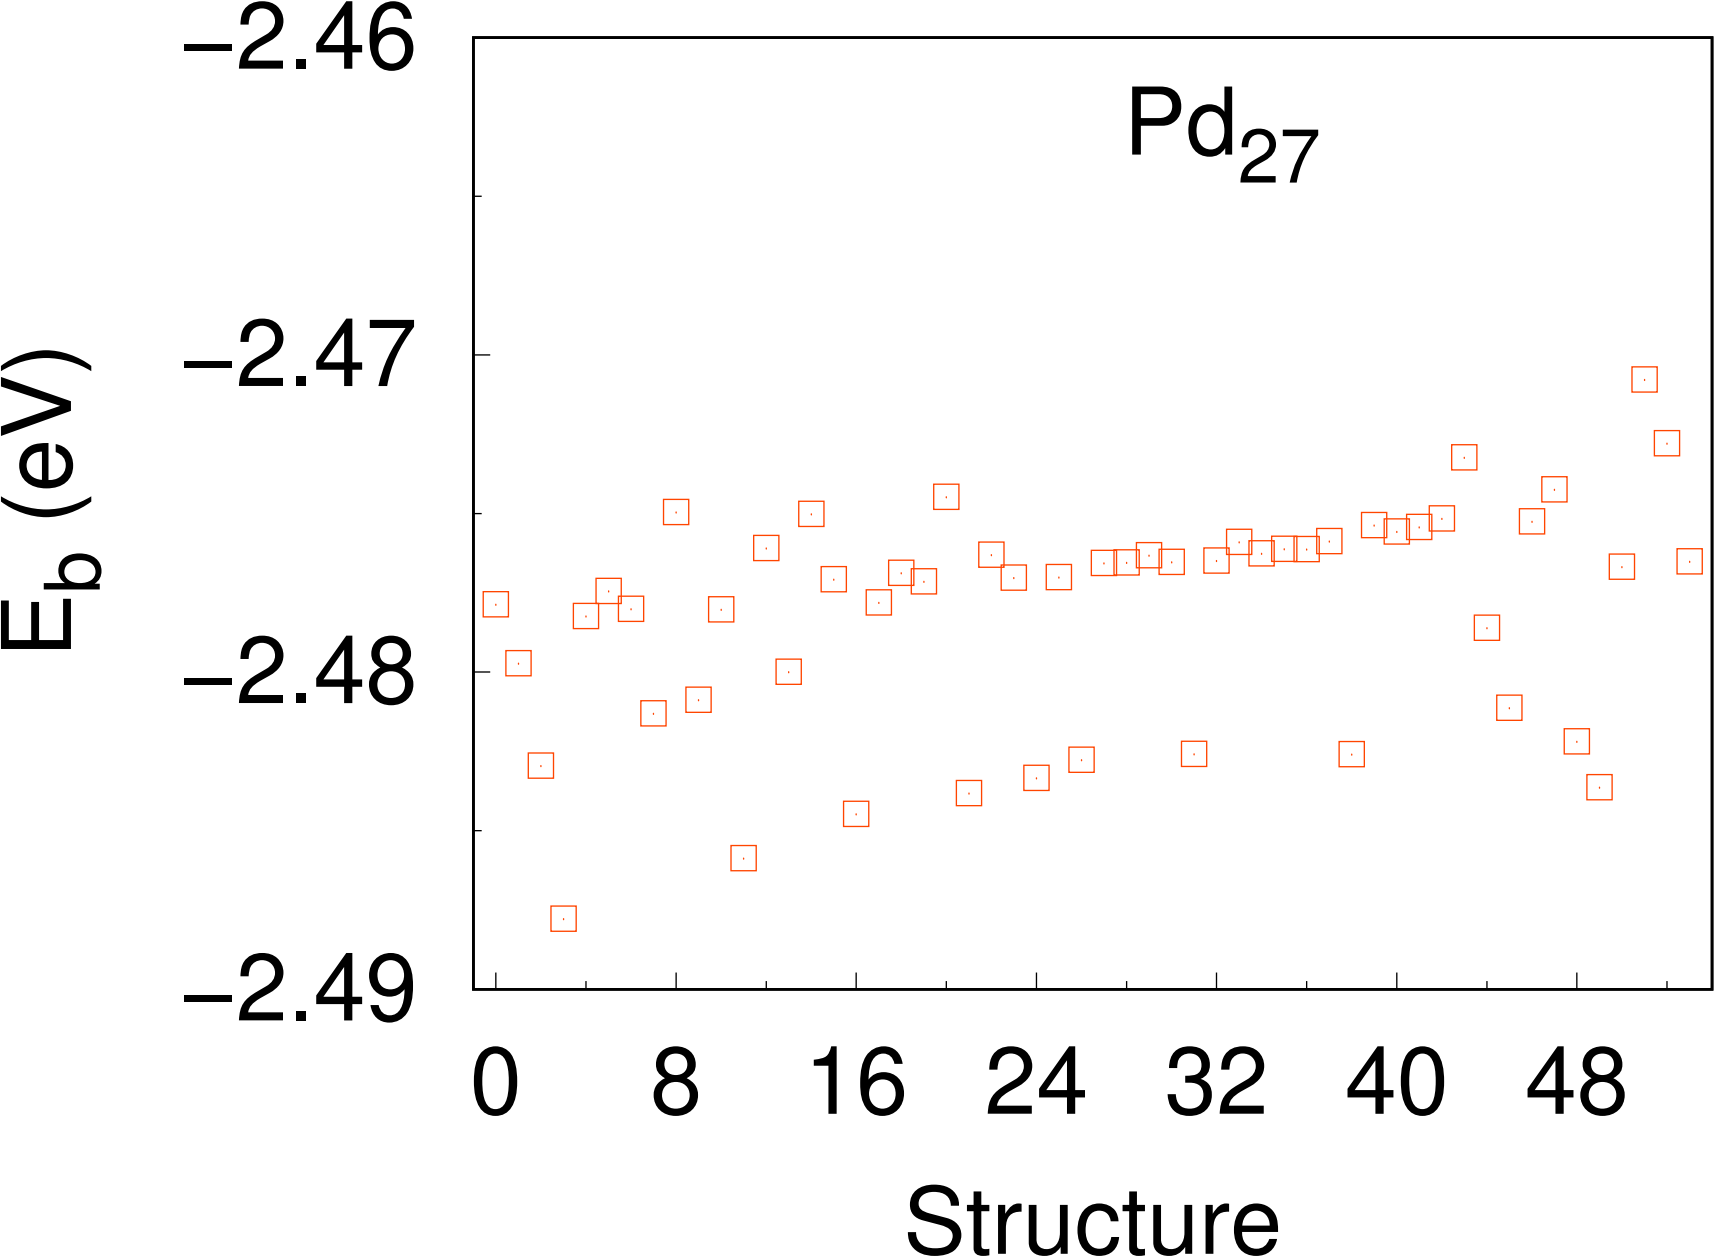

Supplement: d4cp00672k1.zip [file d4cp00672k1.zip]

$\triangle$  13 Atoms     $\square$  27 Atoms     $\diamond$  41 Atoms    — Linear Regression

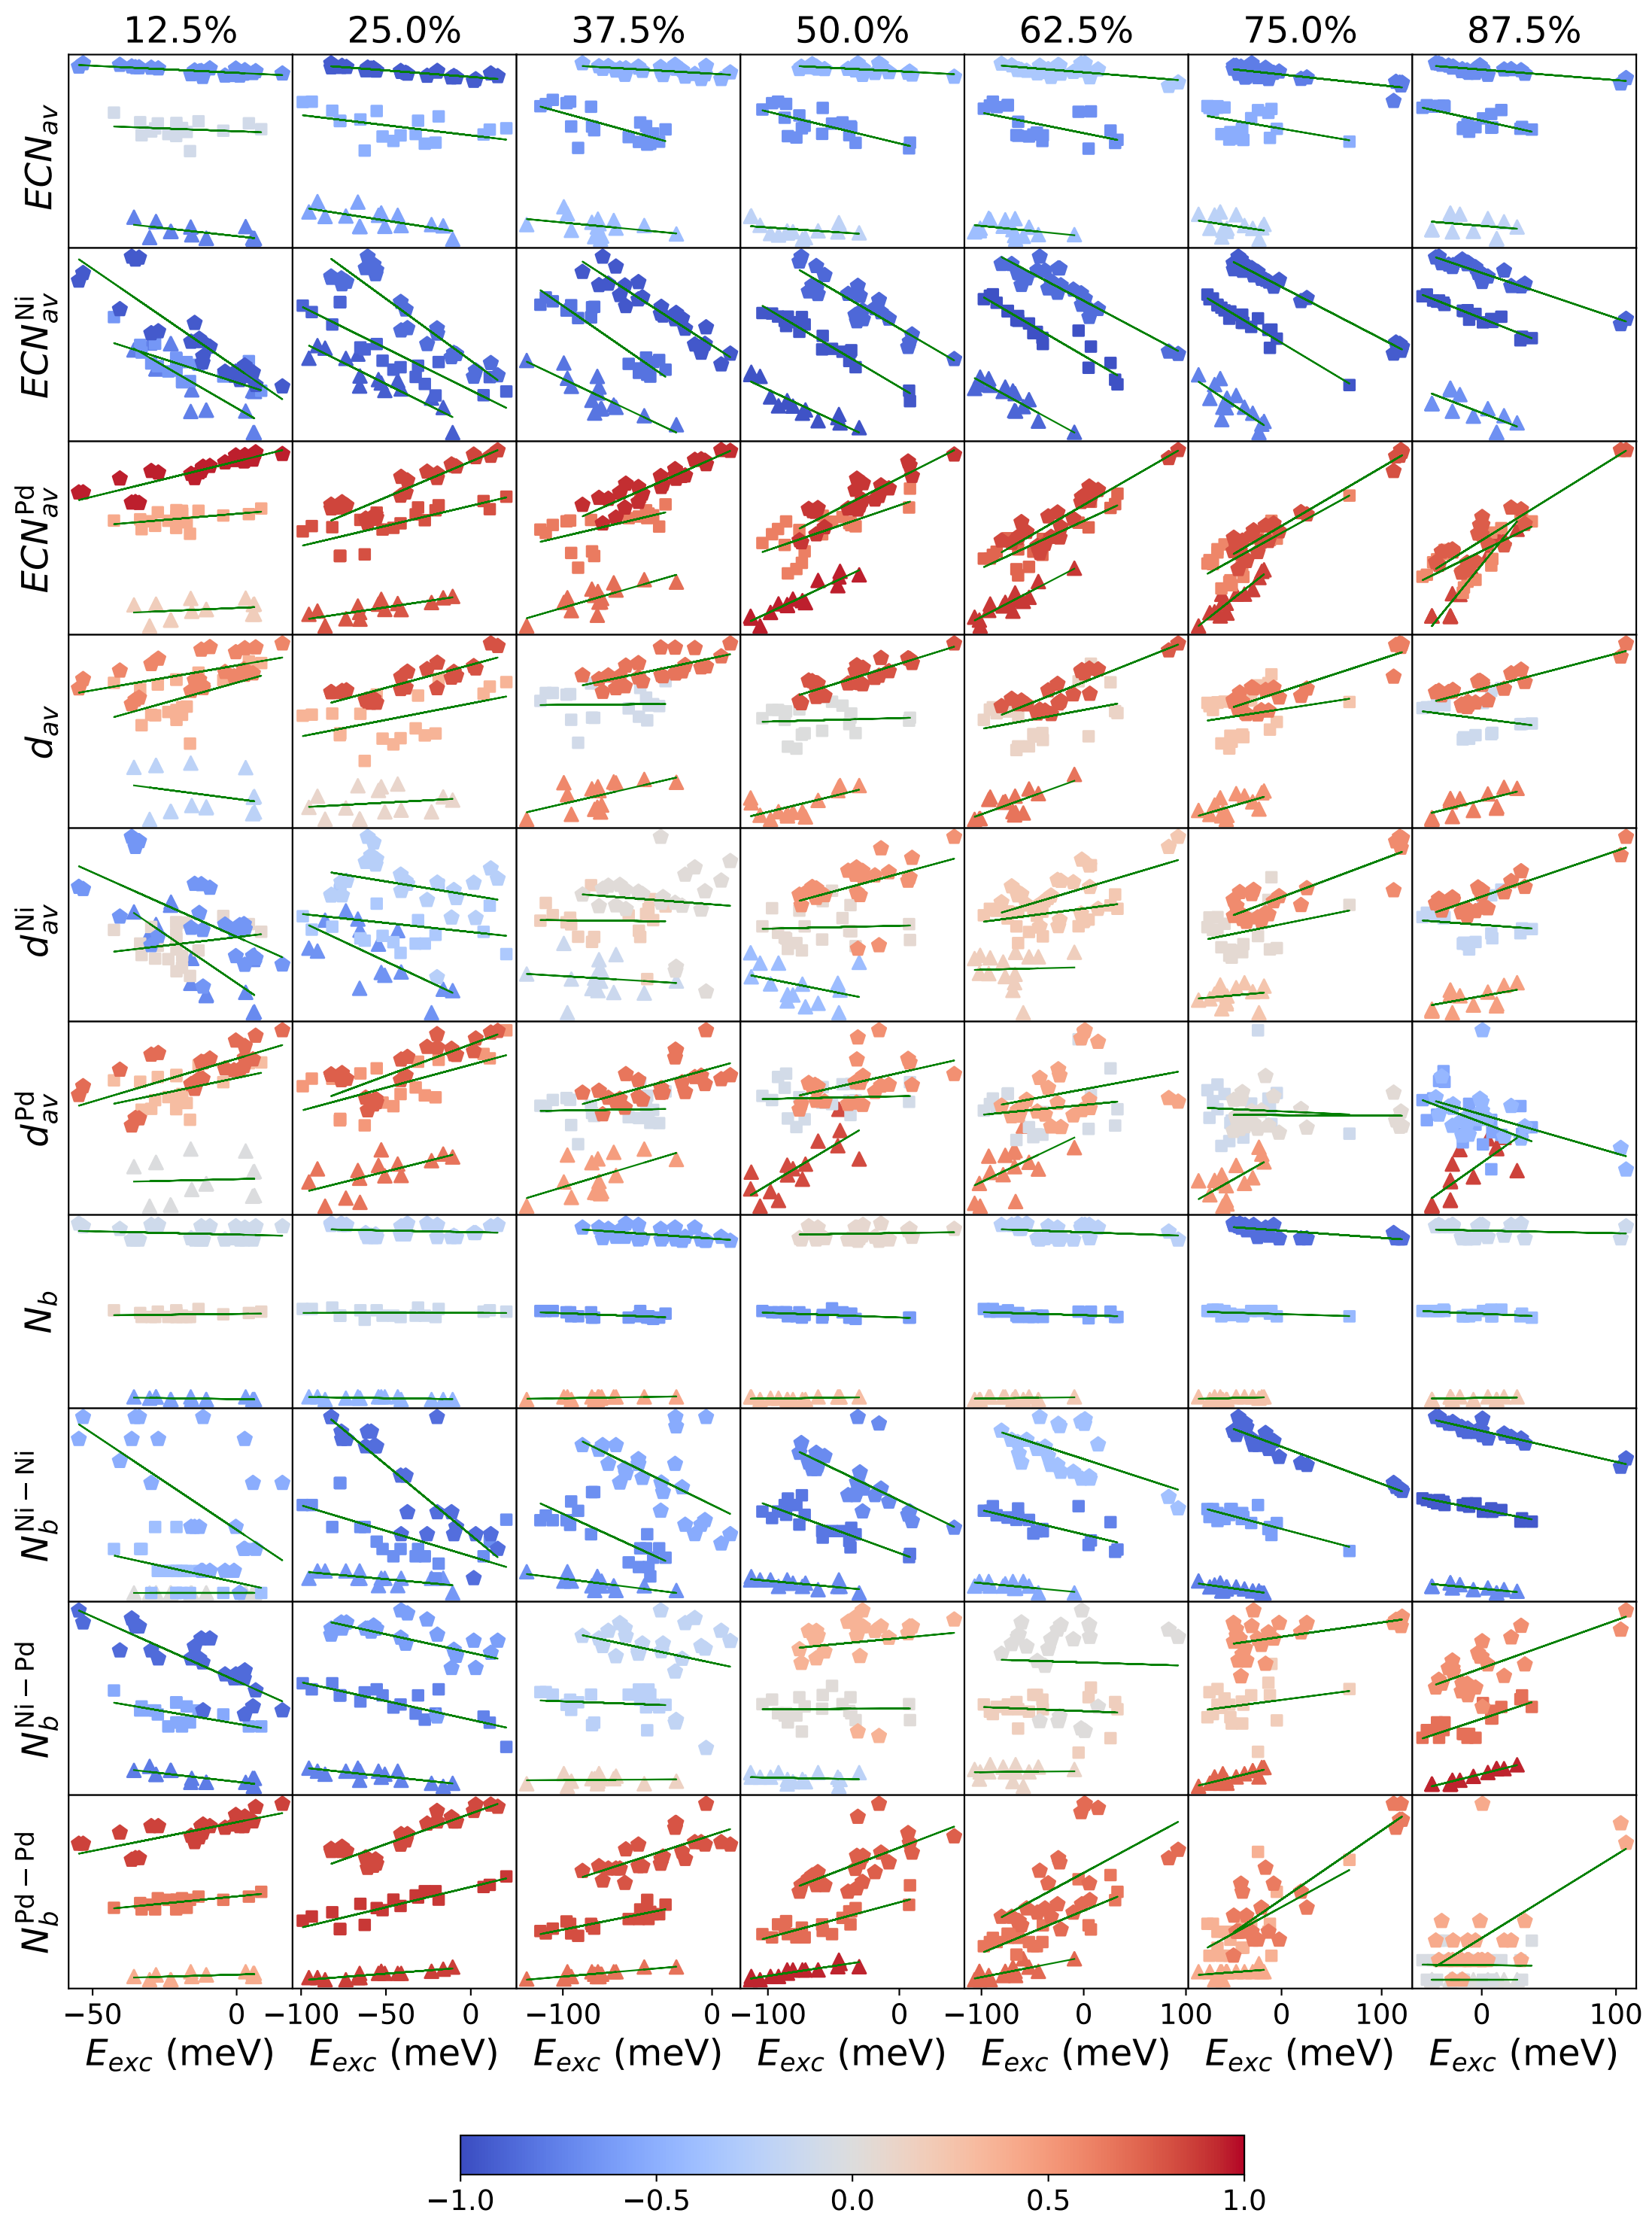

Supplement: d4cp00672k1.zip [file d4cp00672k1.zip]

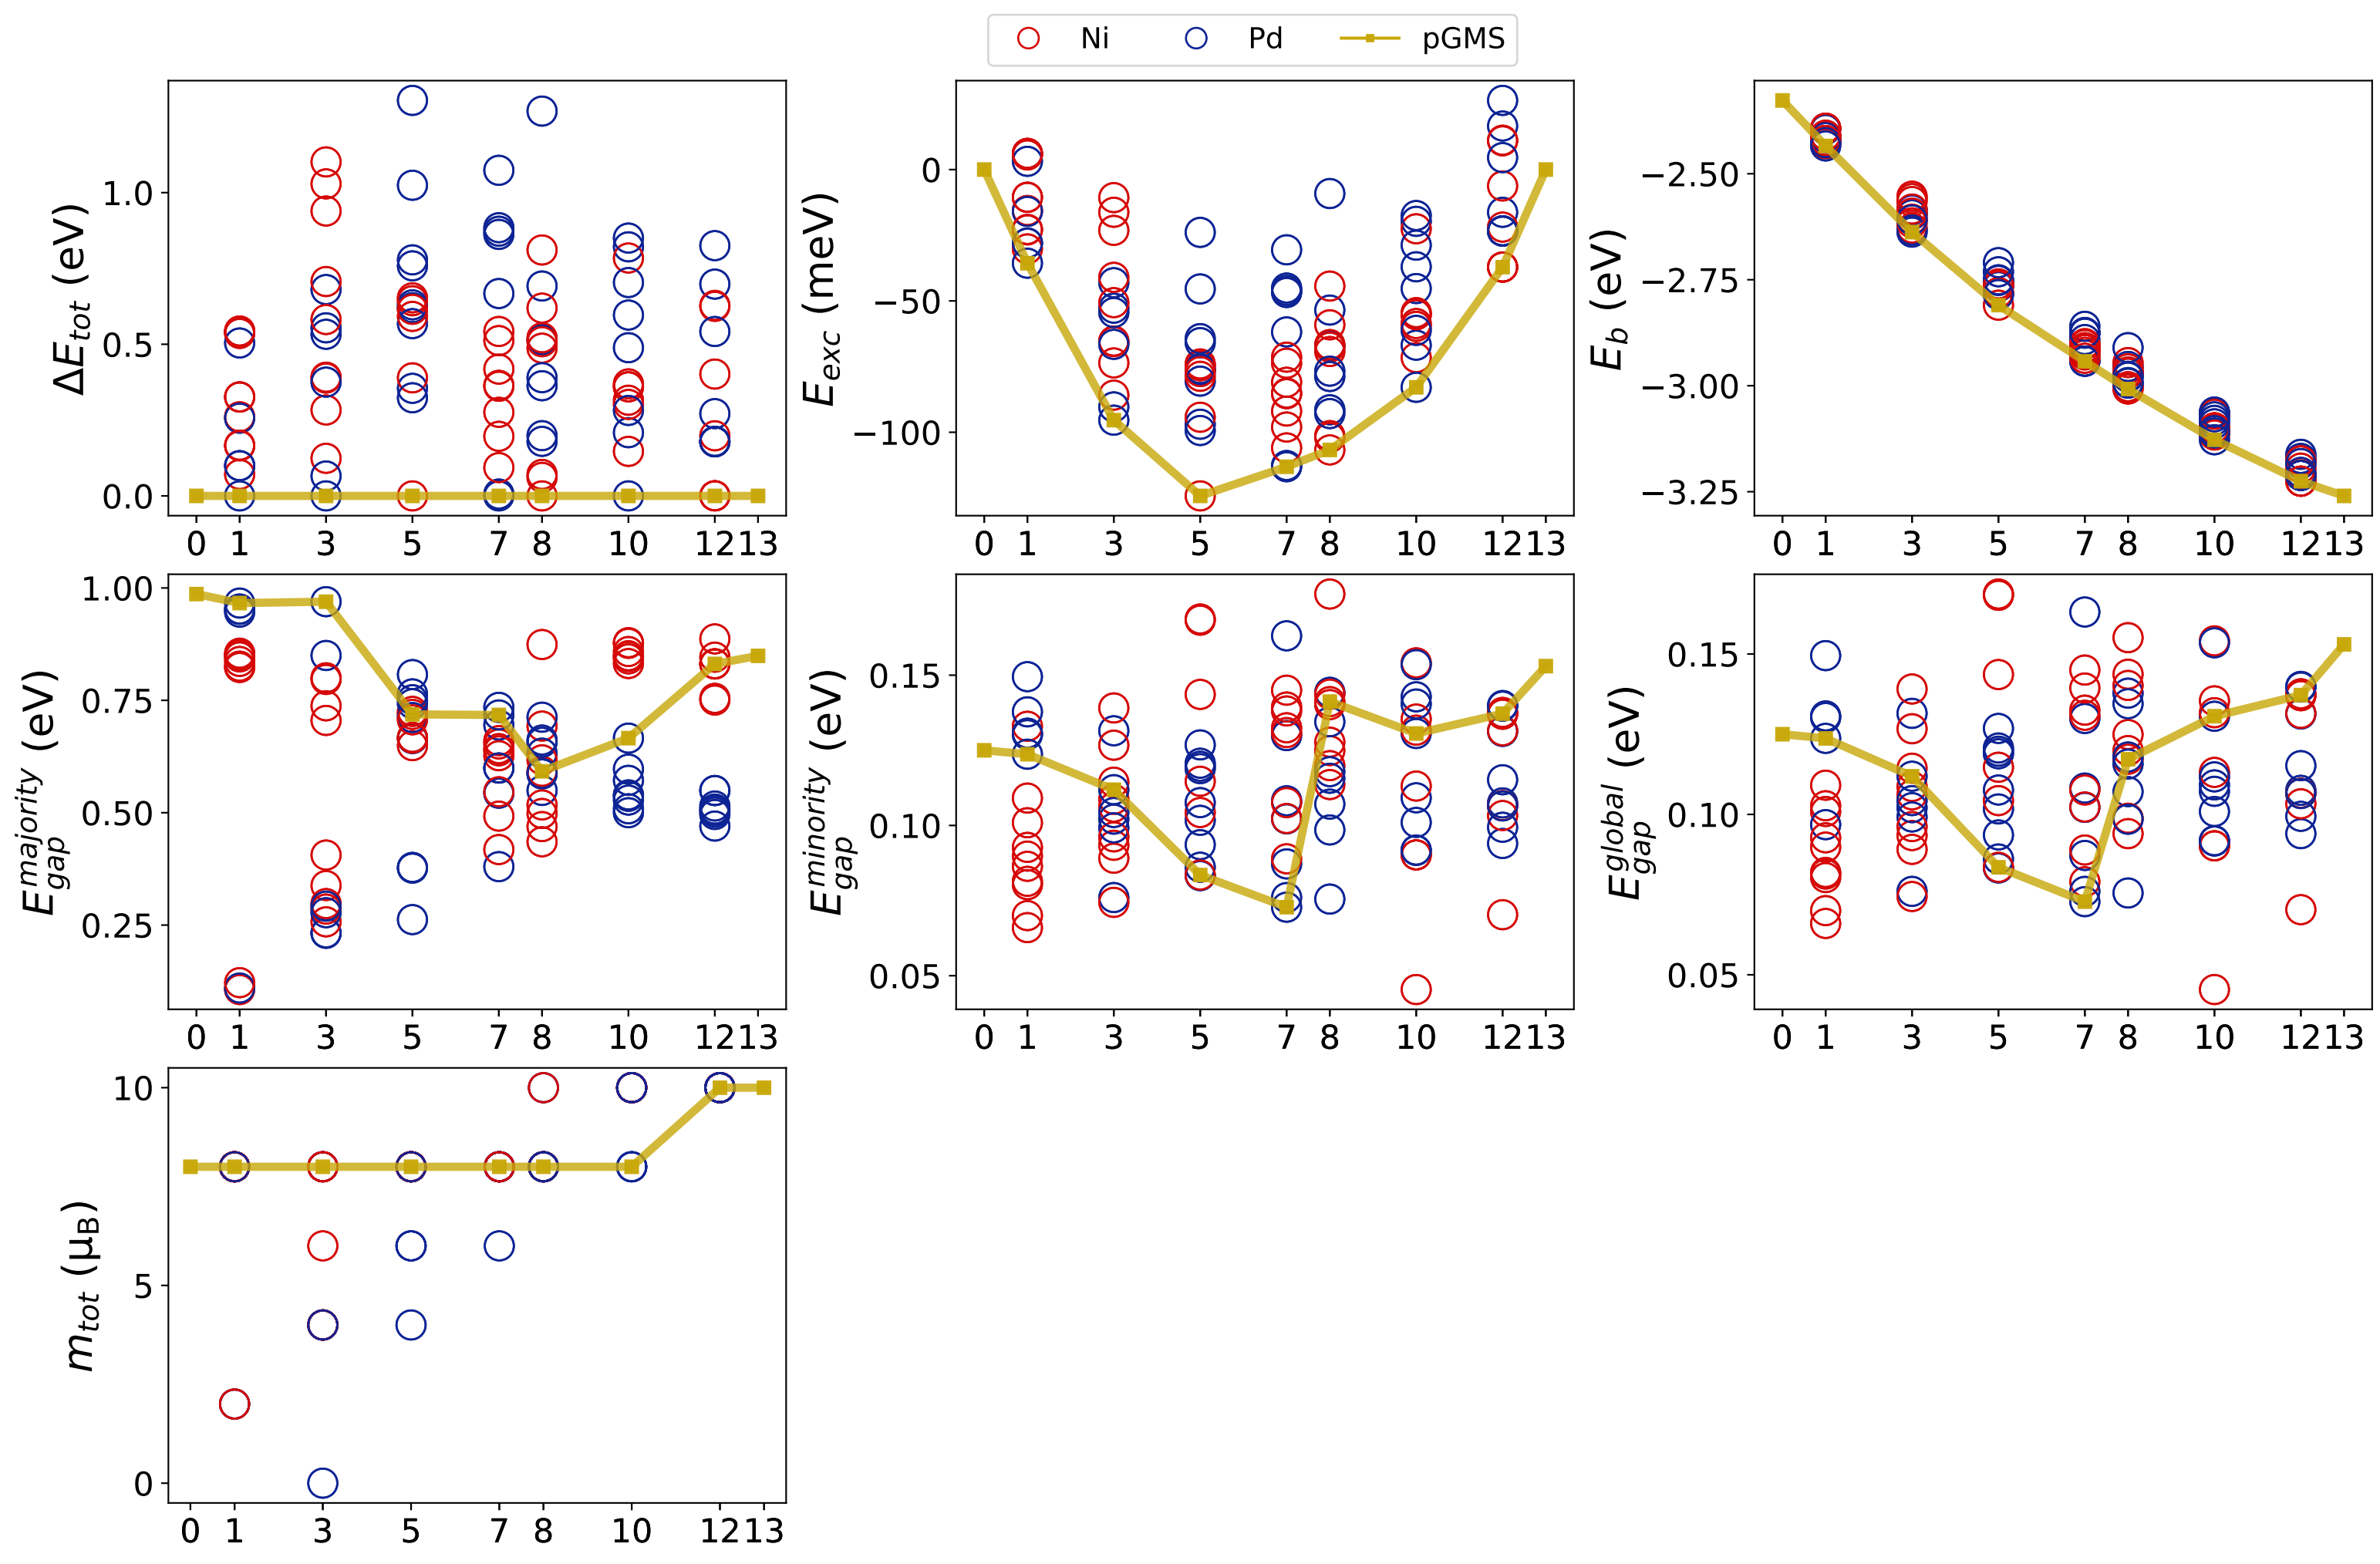

Supplement: d4cp00672k1.zip [file d4cp00672k1.zip]

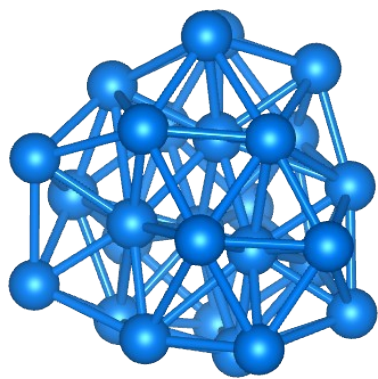

0

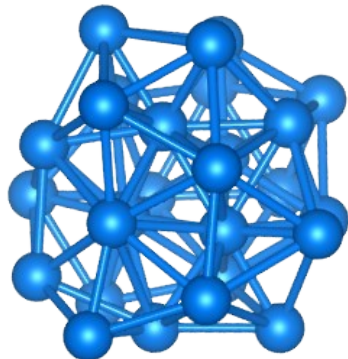

200

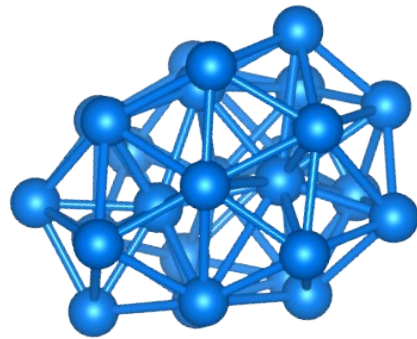

240

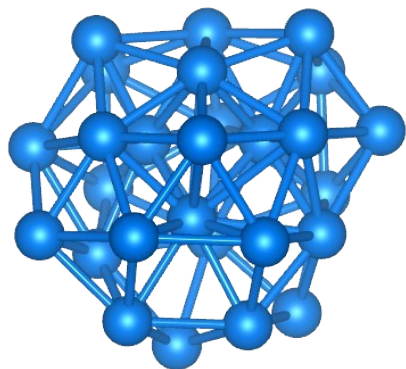

250

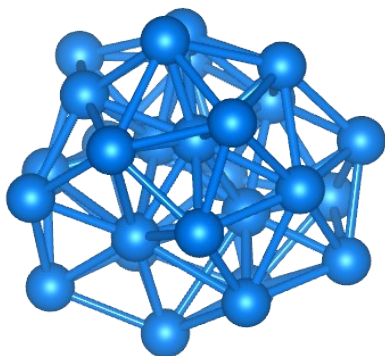

270

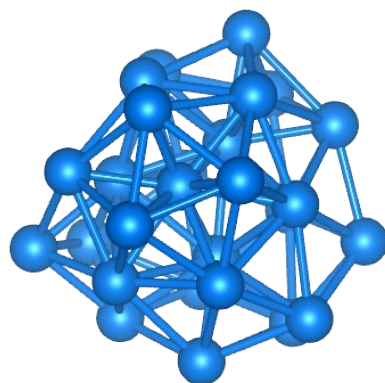

270

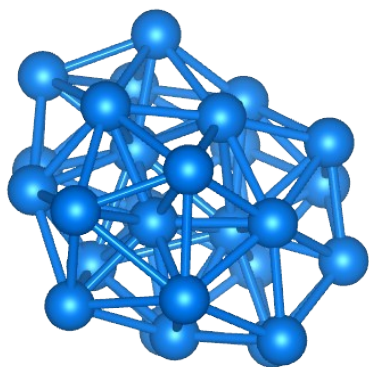

290

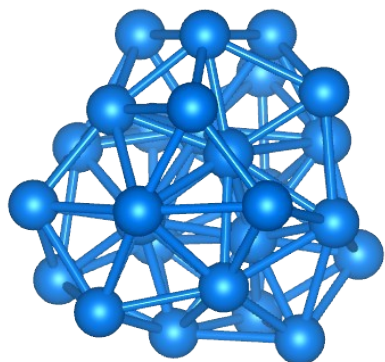

300

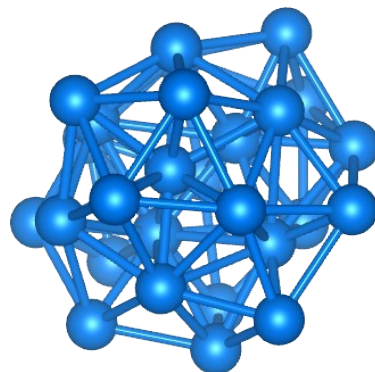

350

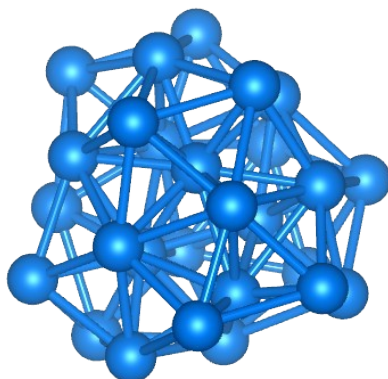

360

Supplement: d4cp00672k1.zip [file d4cp00672k1.zip]

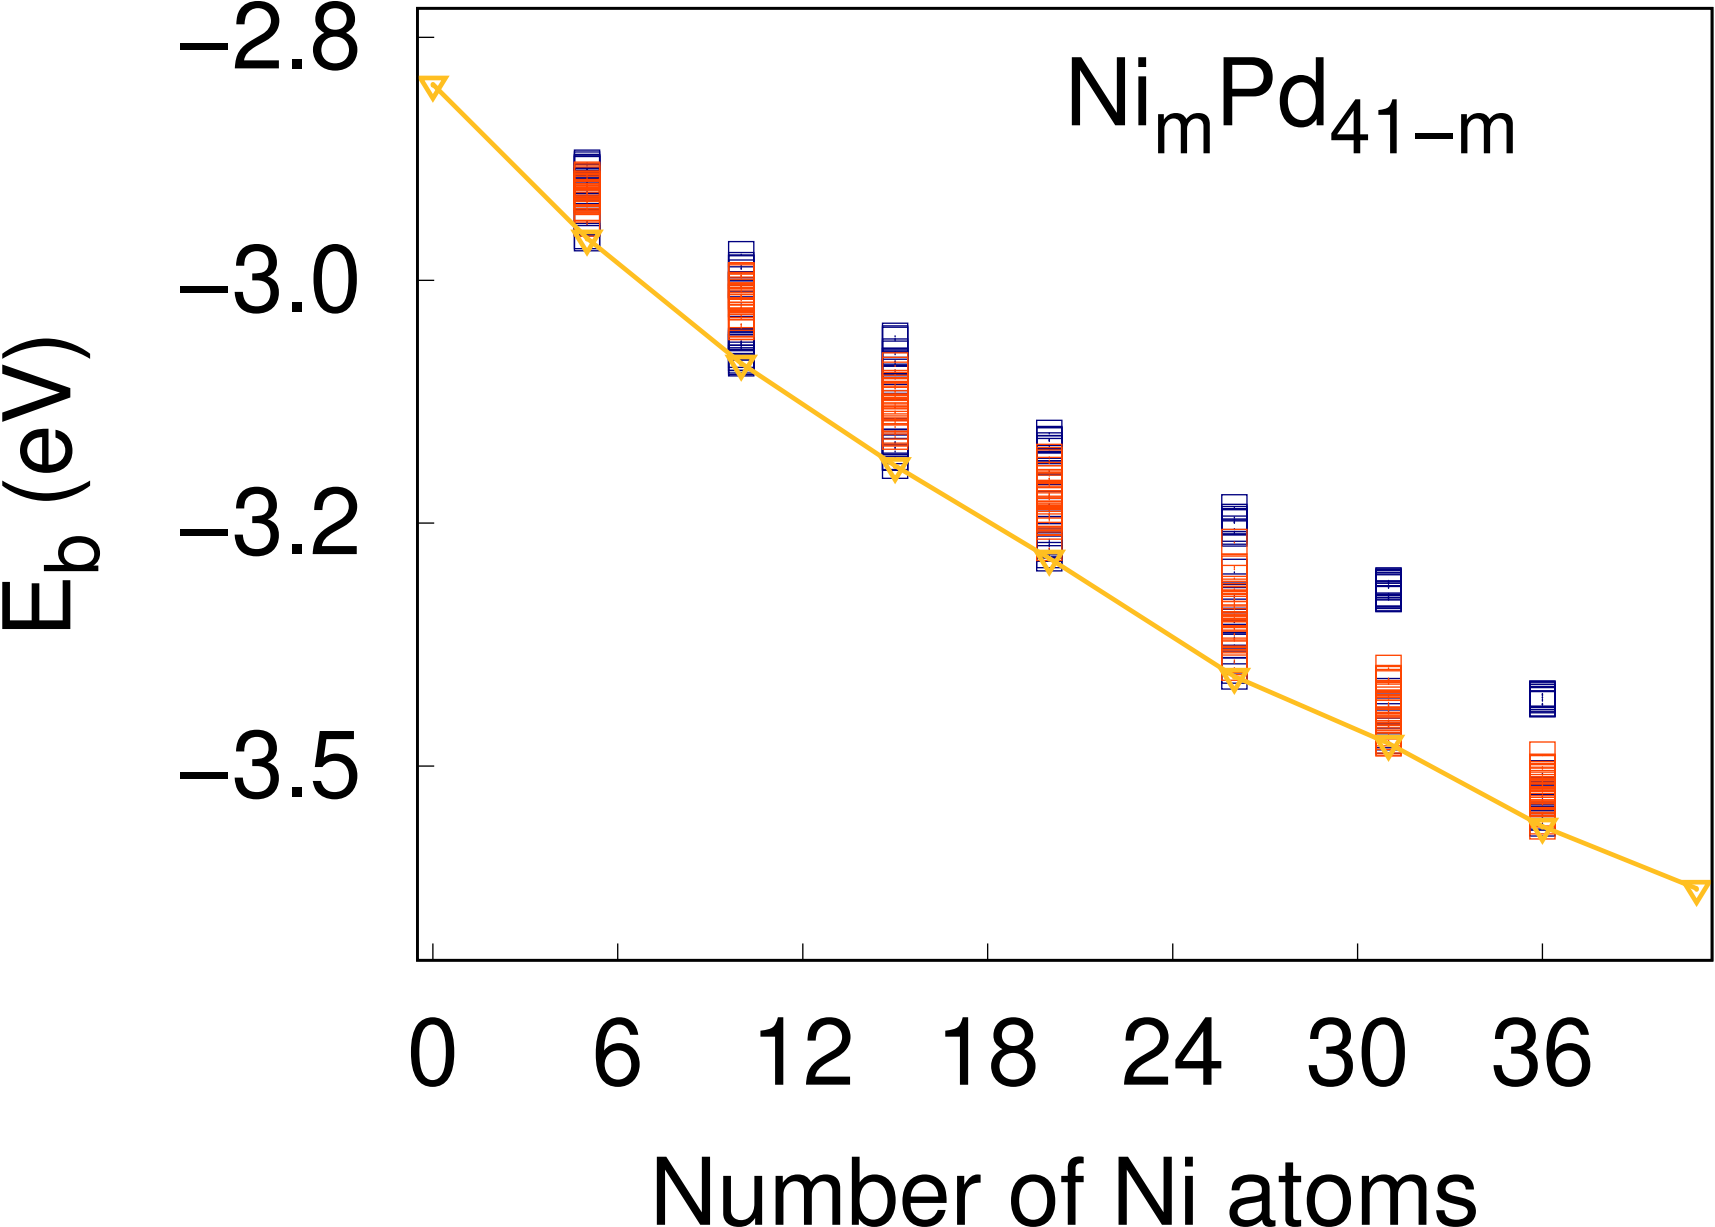

Supplement: d4cp00672k1.zip [file d4cp00672k1.zip]

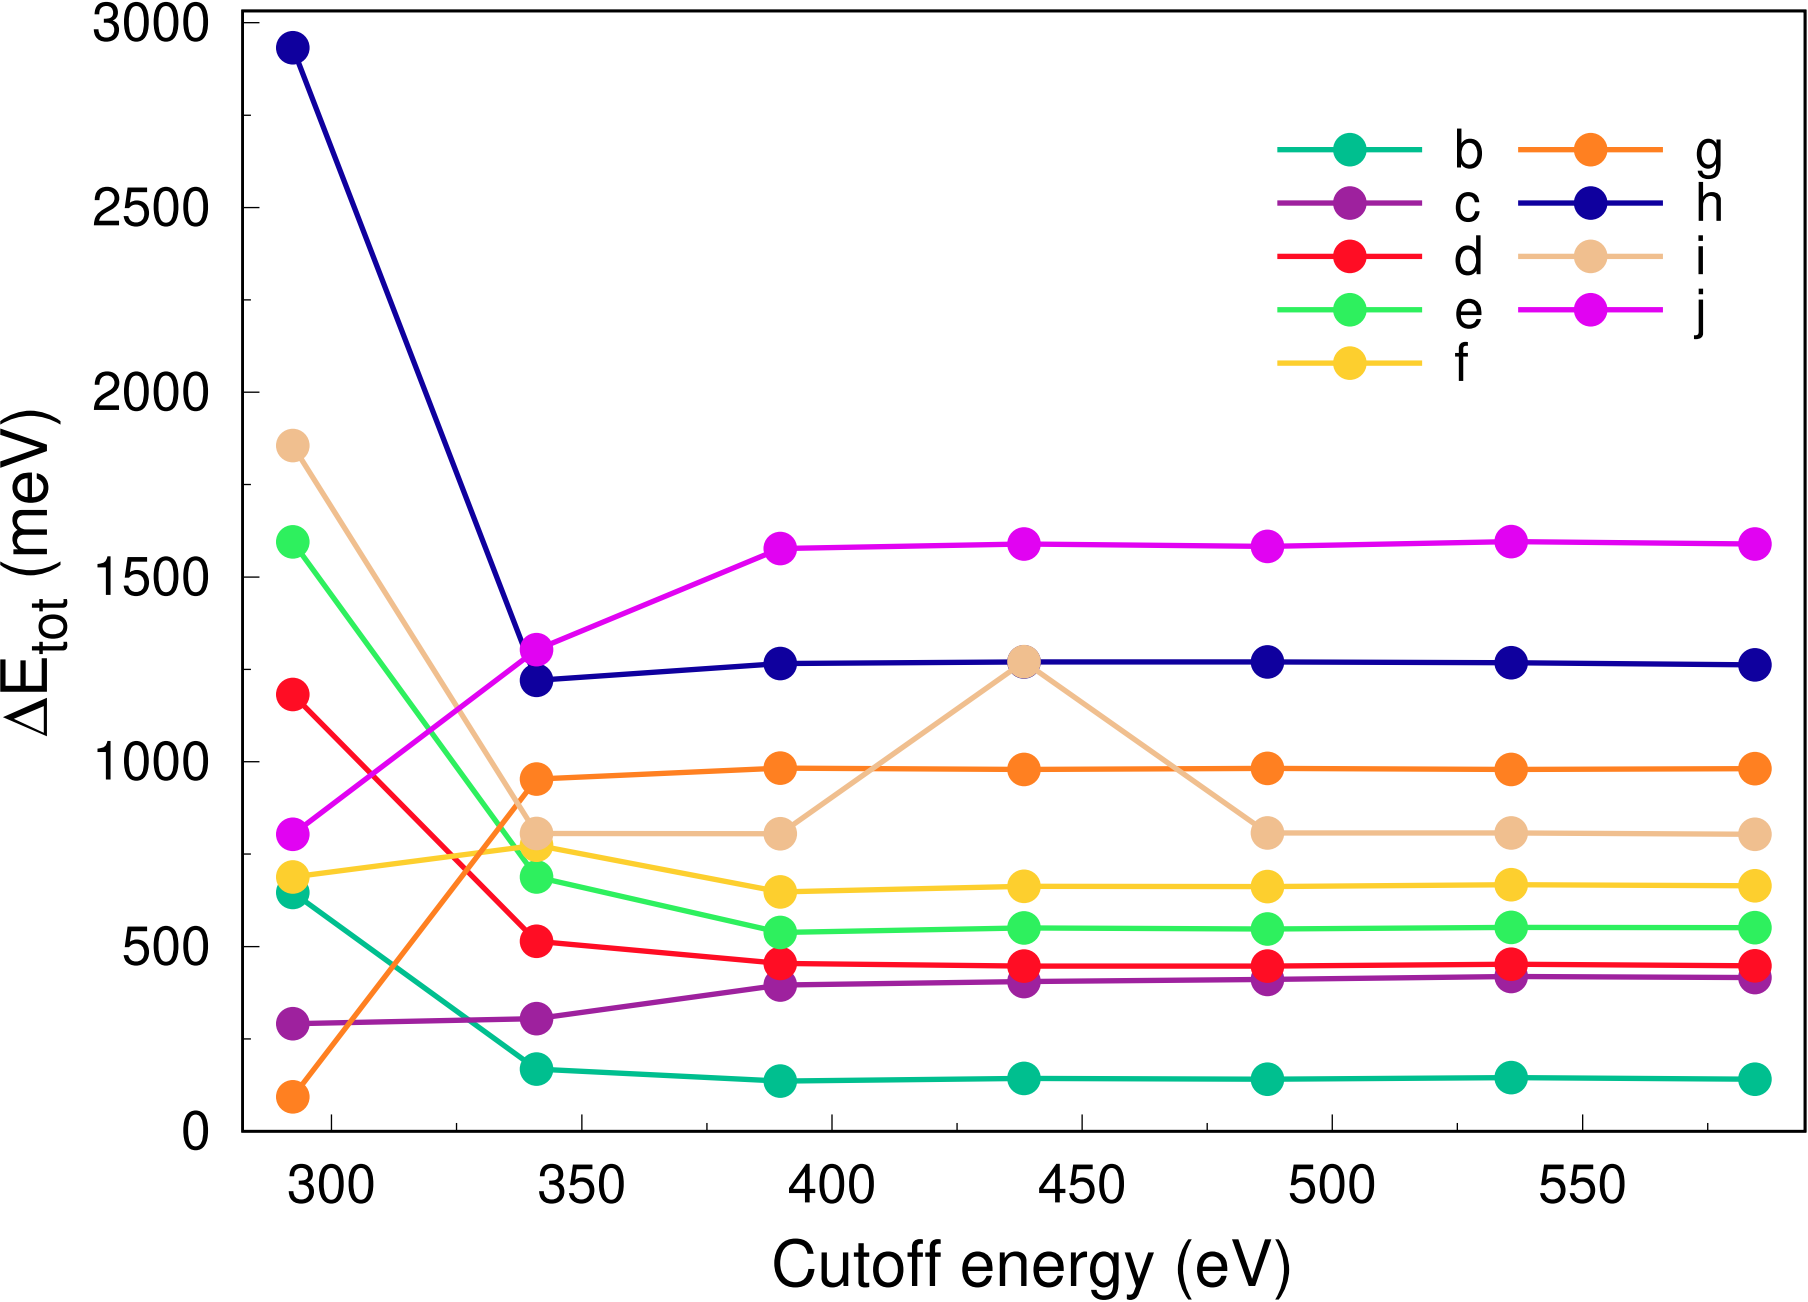

Supplement: d4cp00672k1.zip [file d4cp00672k1.zip]

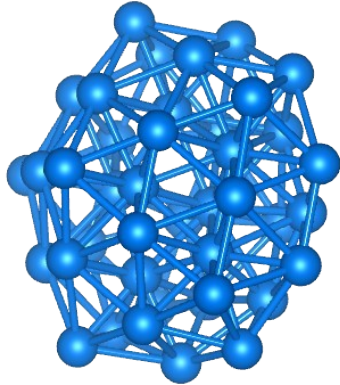

0

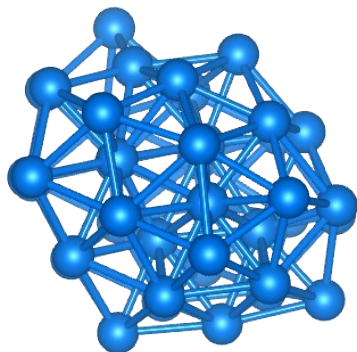

60

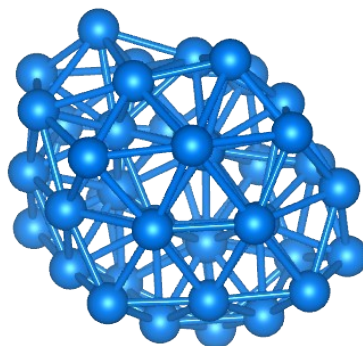

70

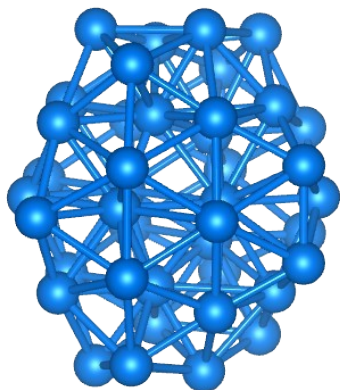

110

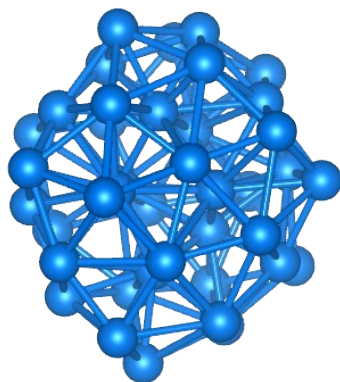

110

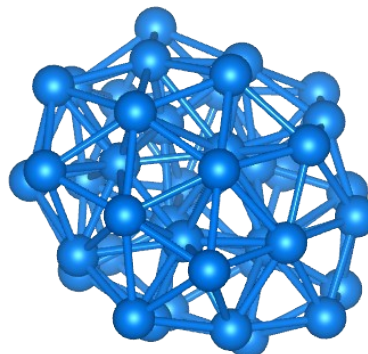

120

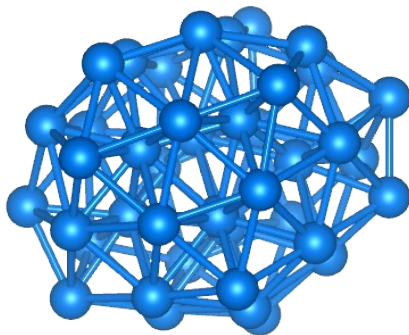

150

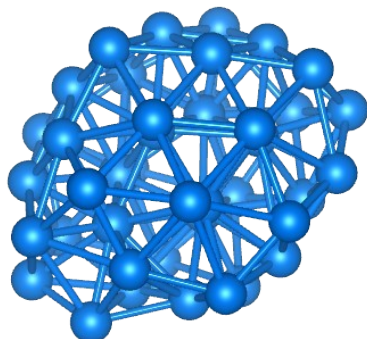

170

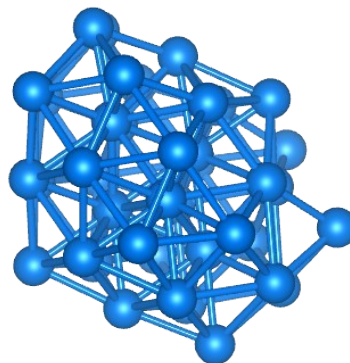

220

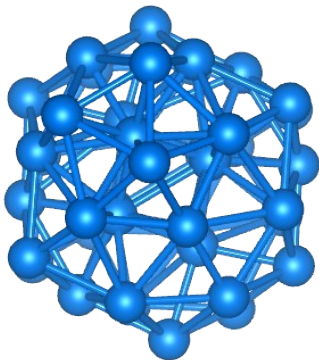

250

Supplement: d4cp00672k1.zip [file d4cp00672k1.zip]

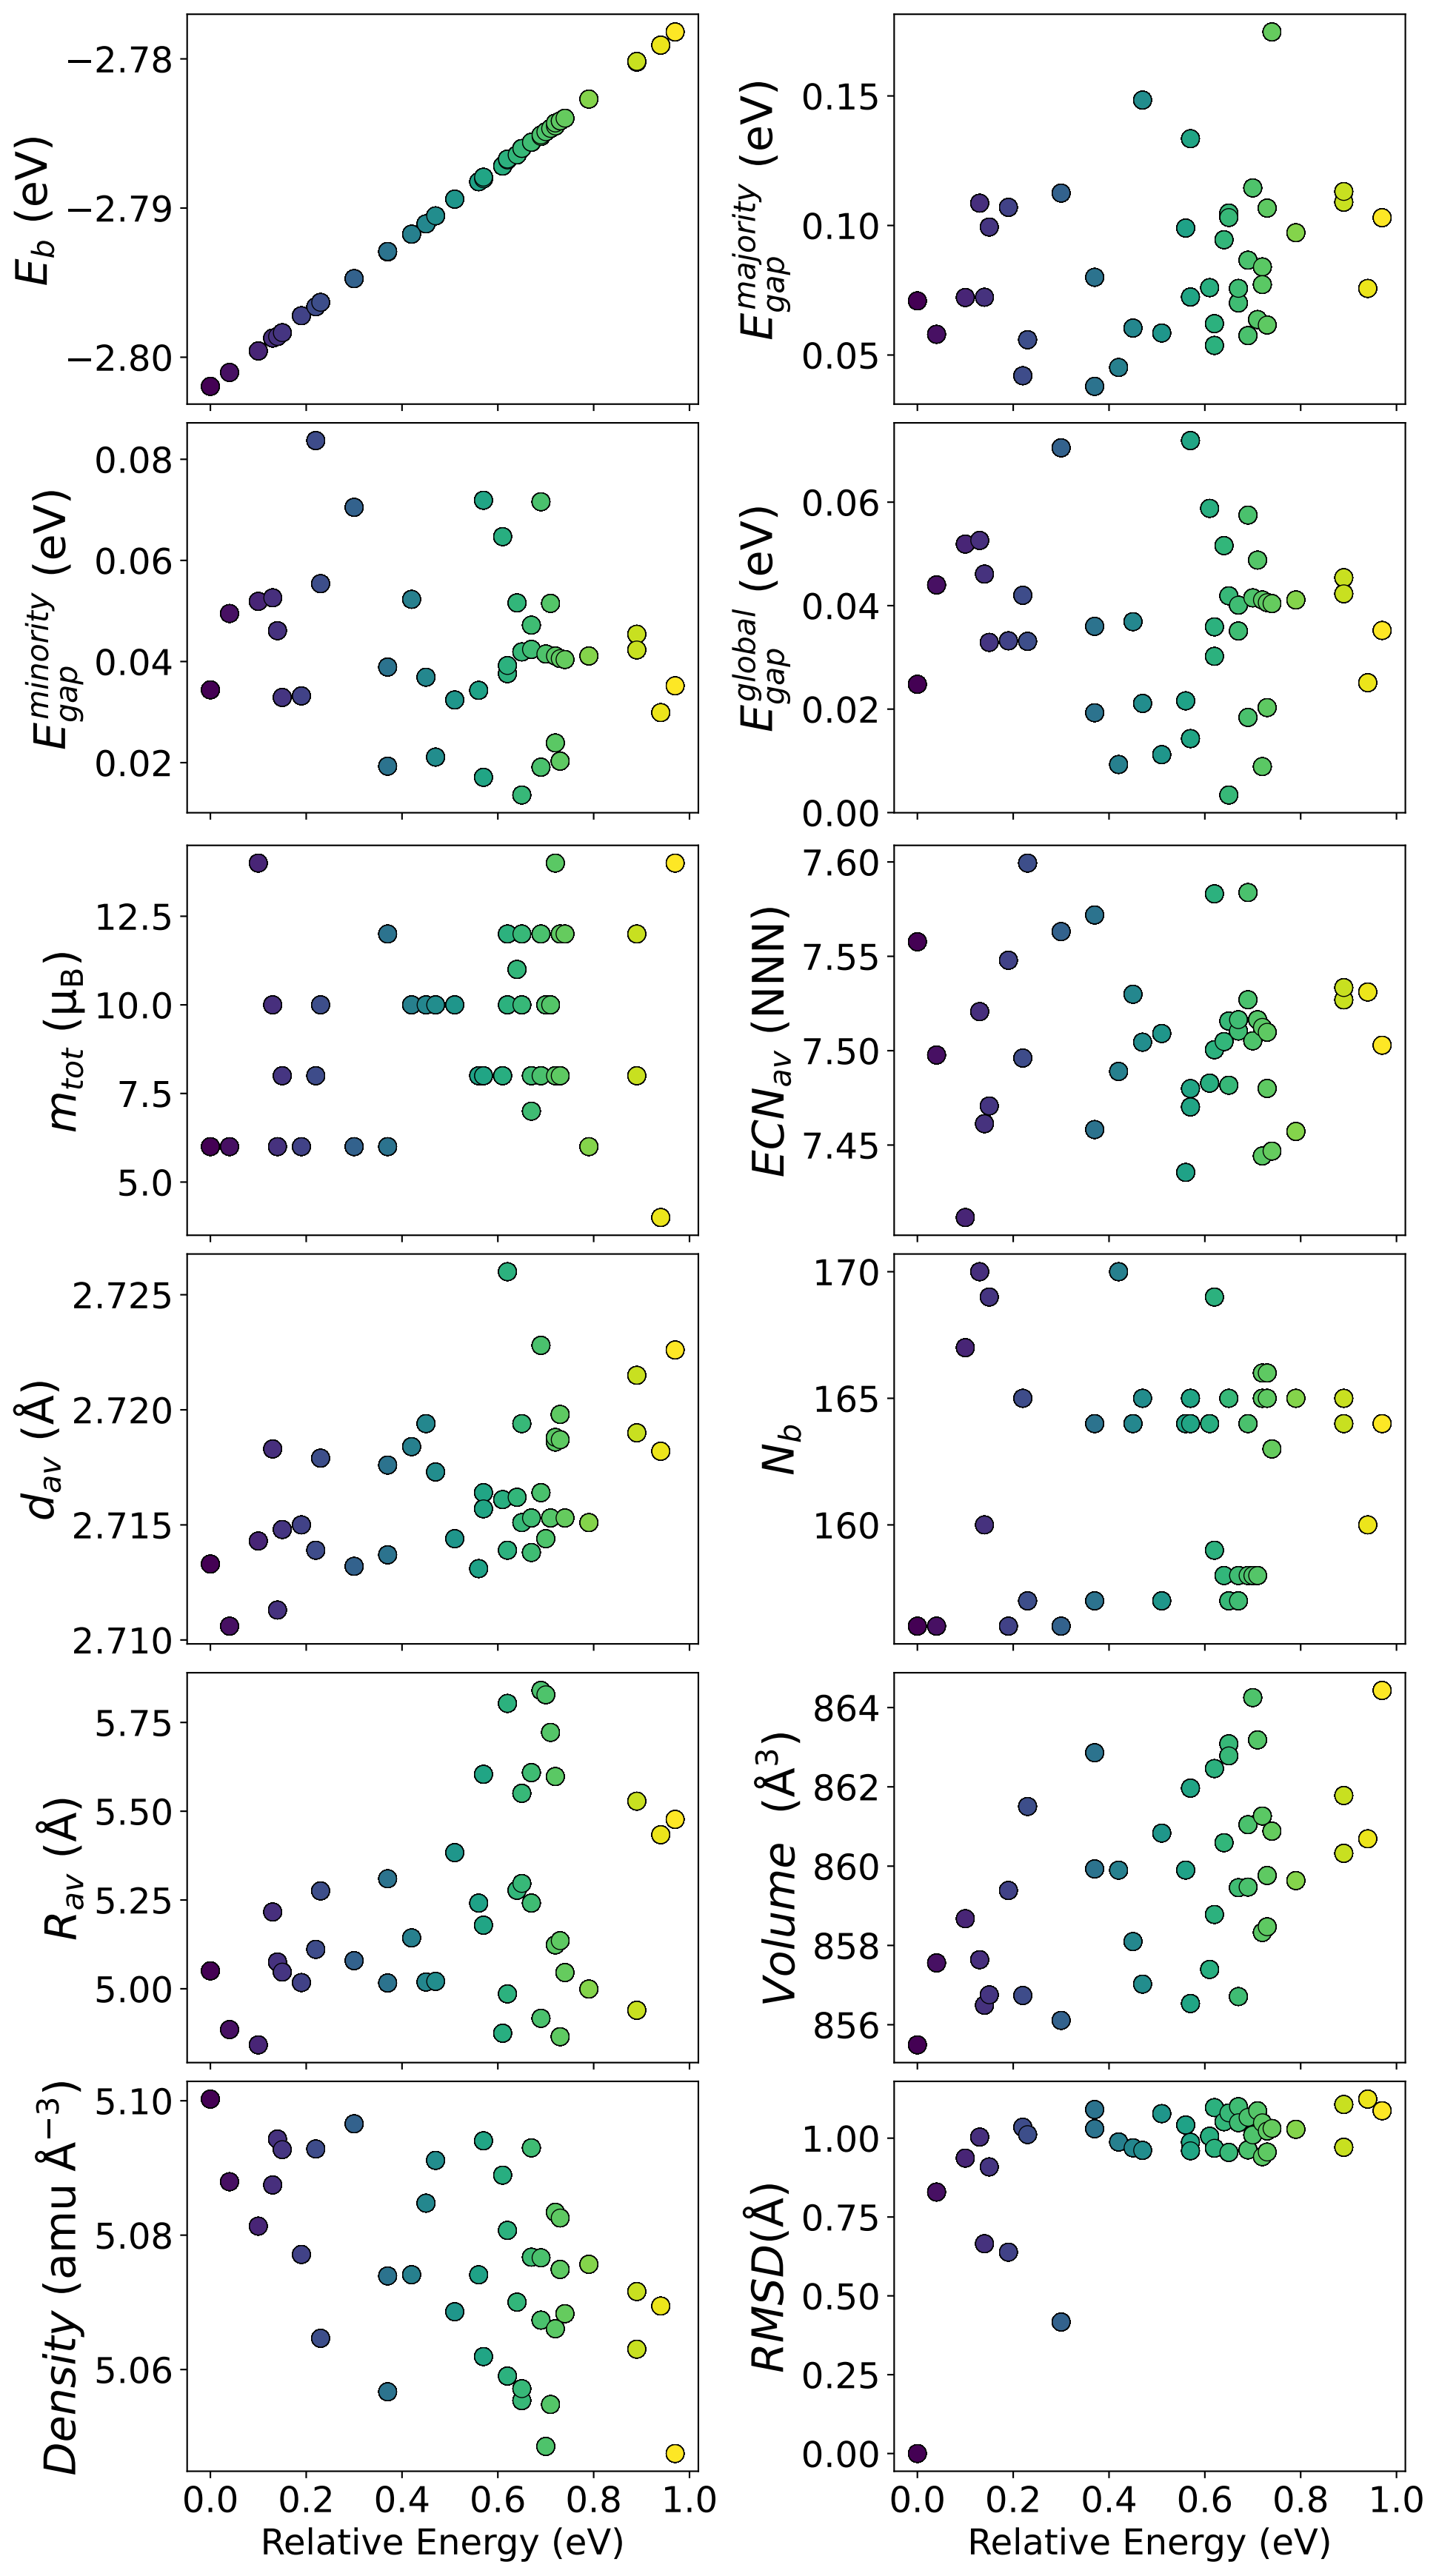

Supplement: d4cp00672k1.zip [file d4cp00672k1.zip]

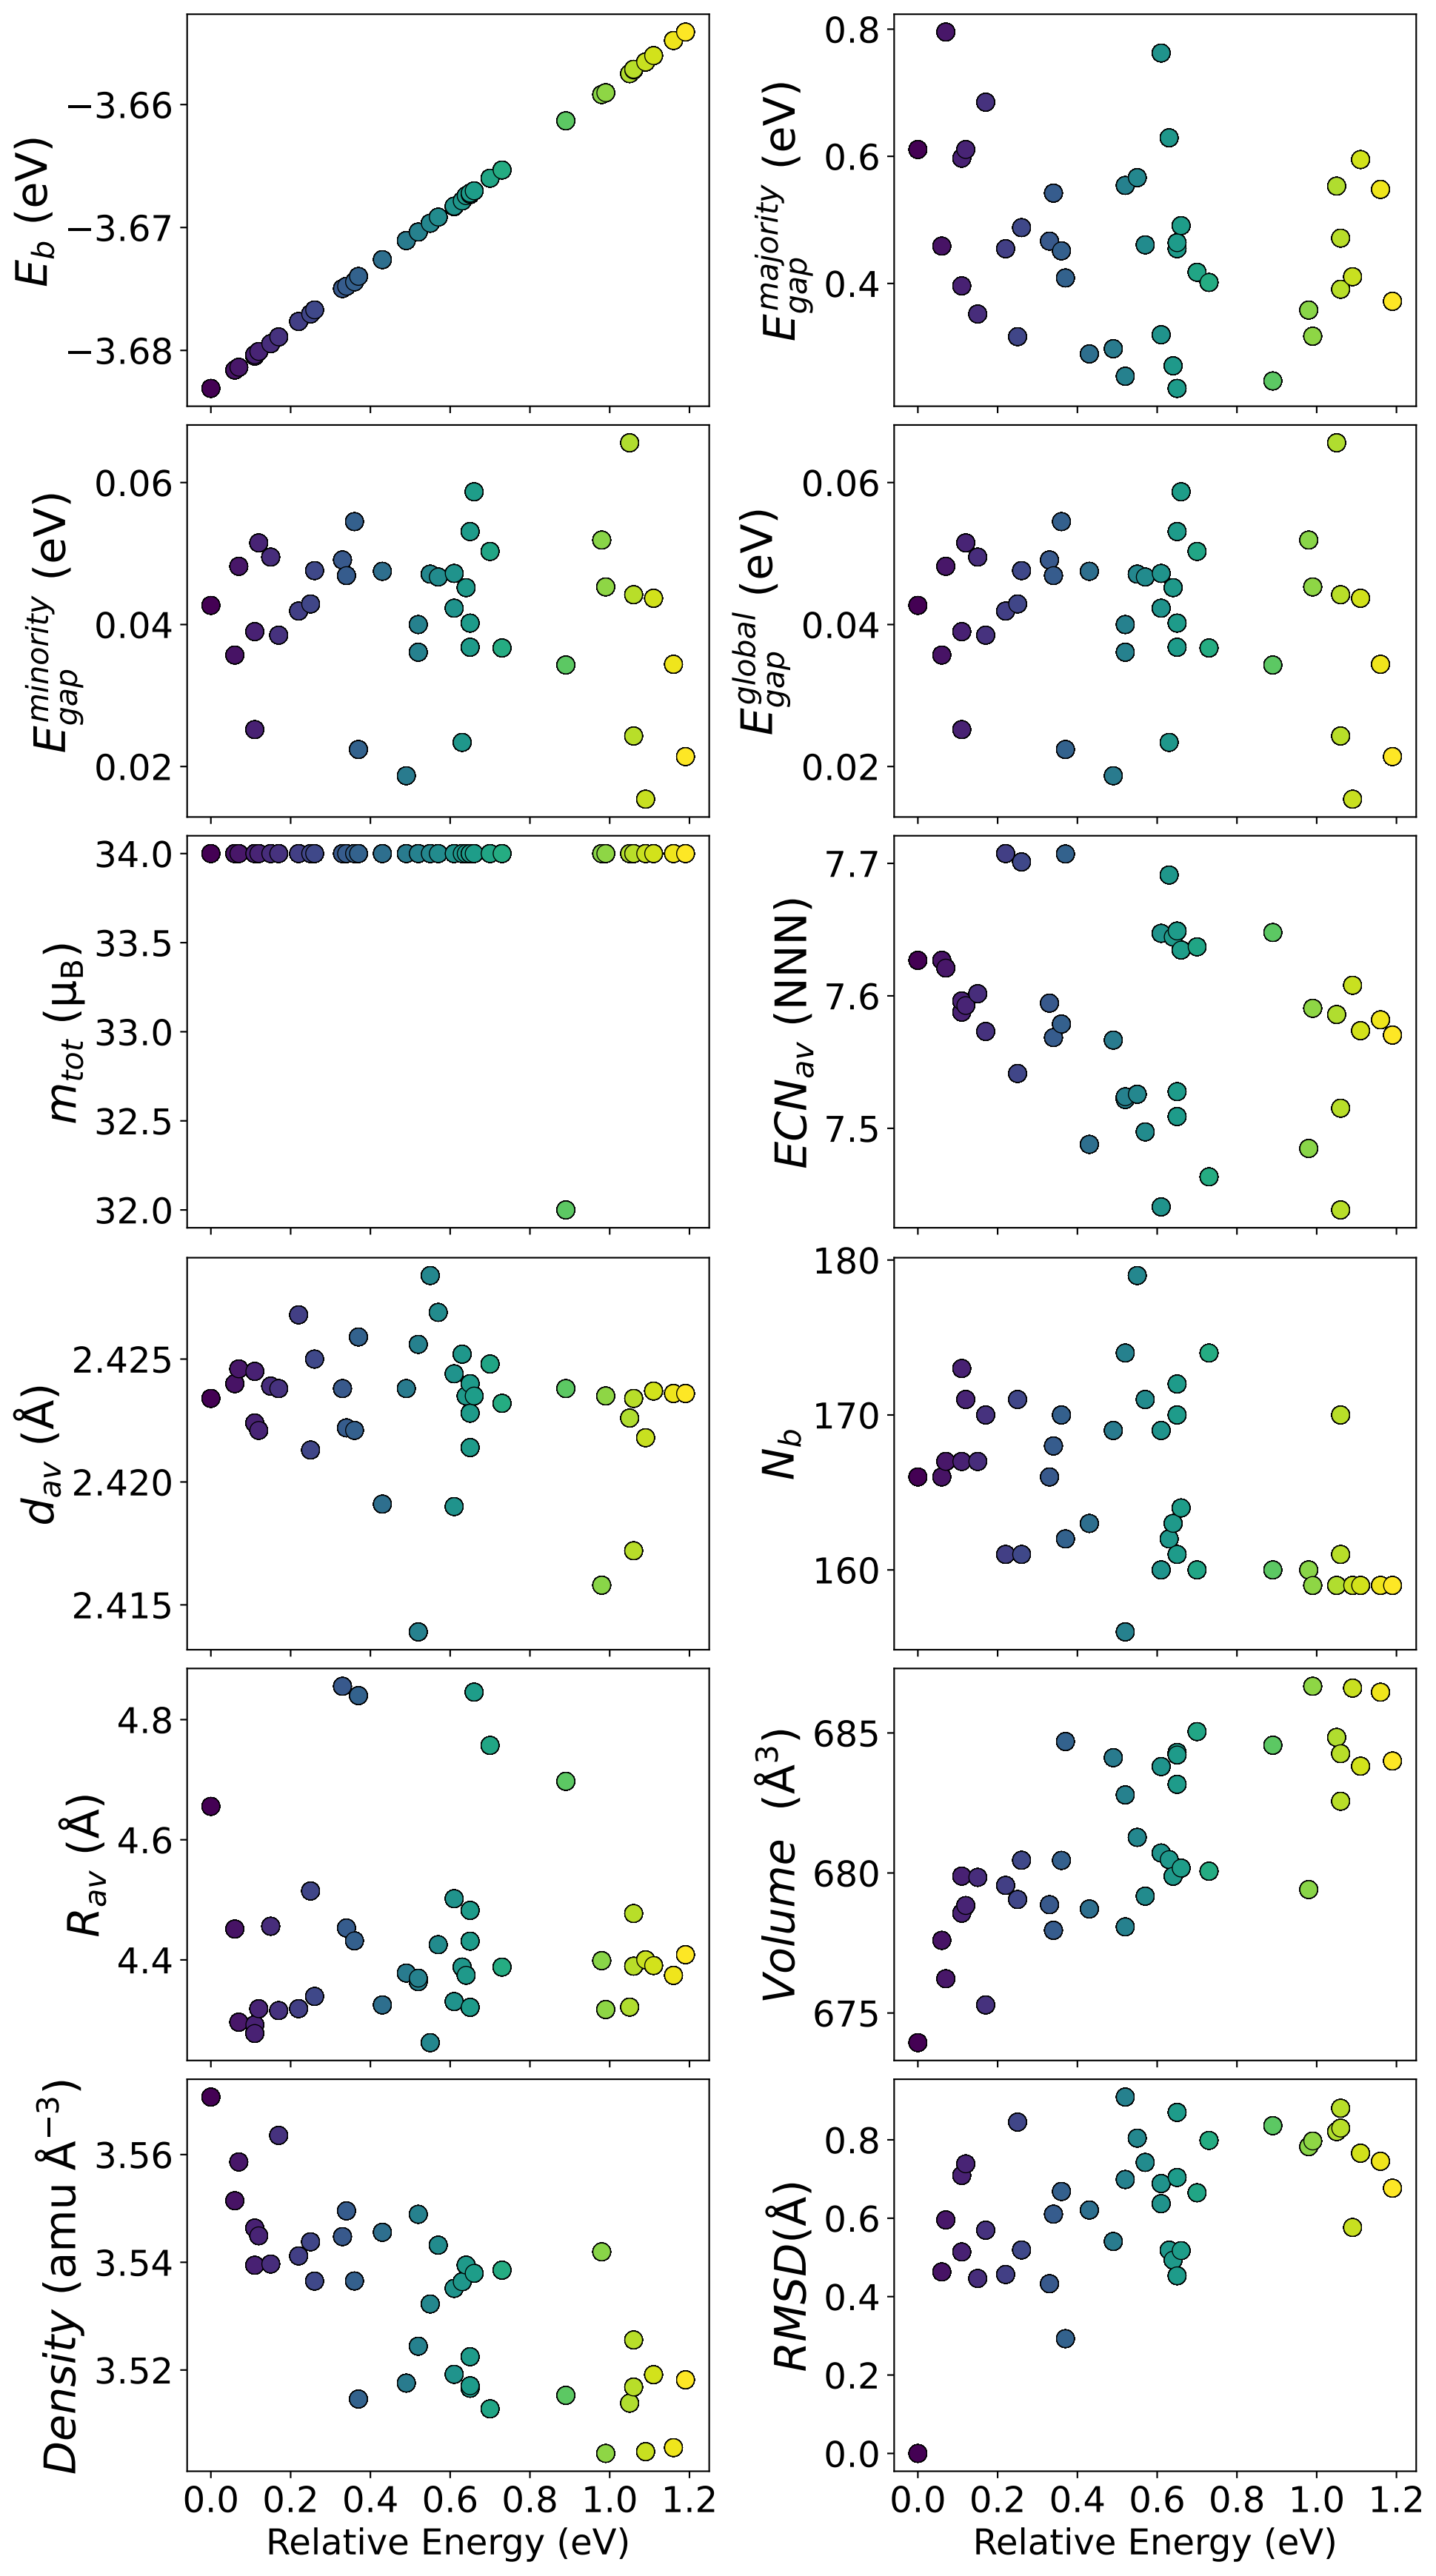

Supplement: d4cp00672k1.zip [file d4cp00672k1.zip]

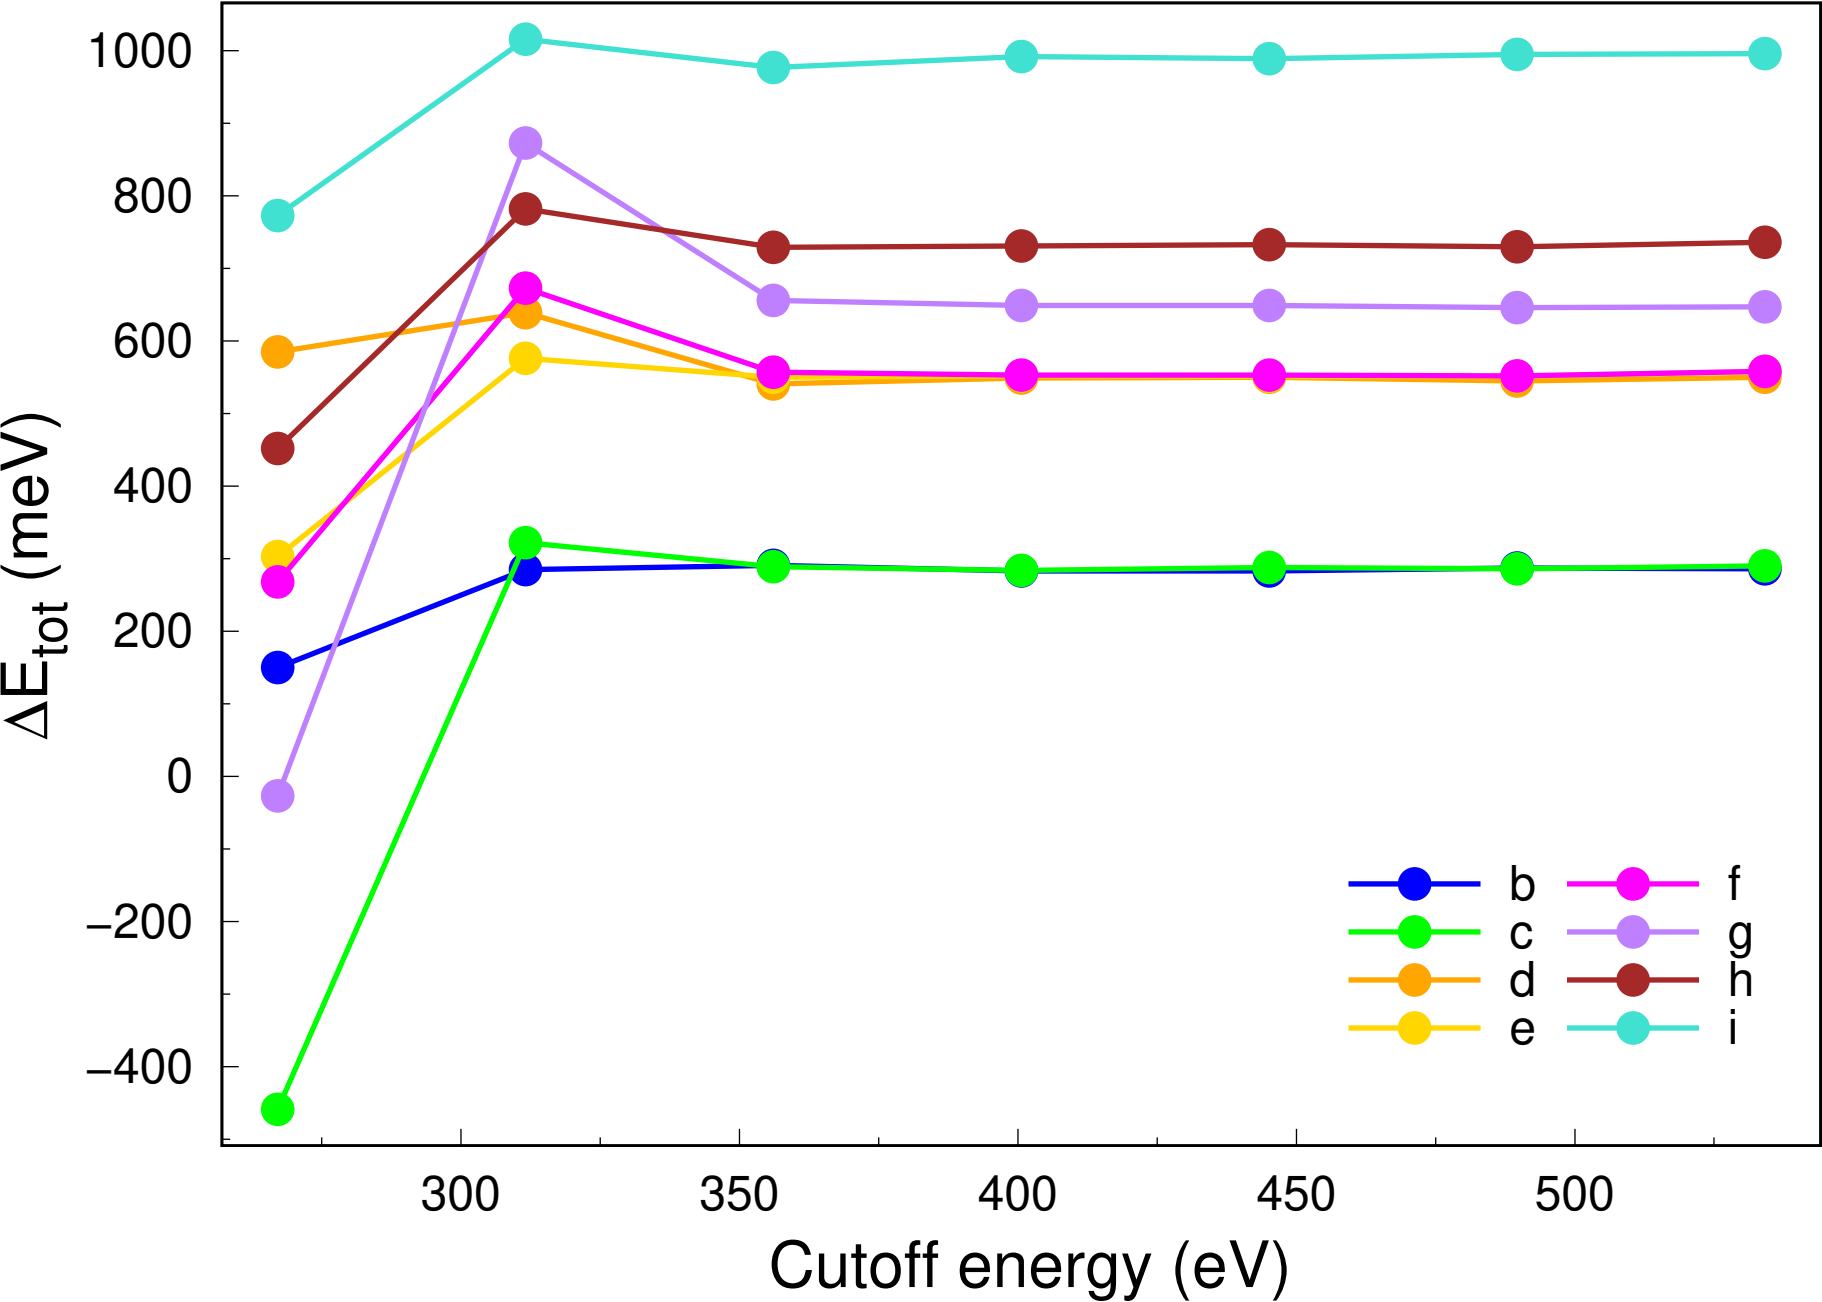

Supplement: d4cp00672k1.zip [file d4cp00672k1.zip]

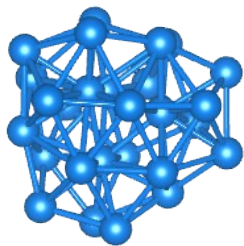

Ni<sub>27</sub>

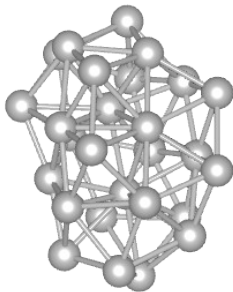

Pd<sub>27</sub>

Supplement: d4cp00672k1.zip [file d4cp00672k1.zip]

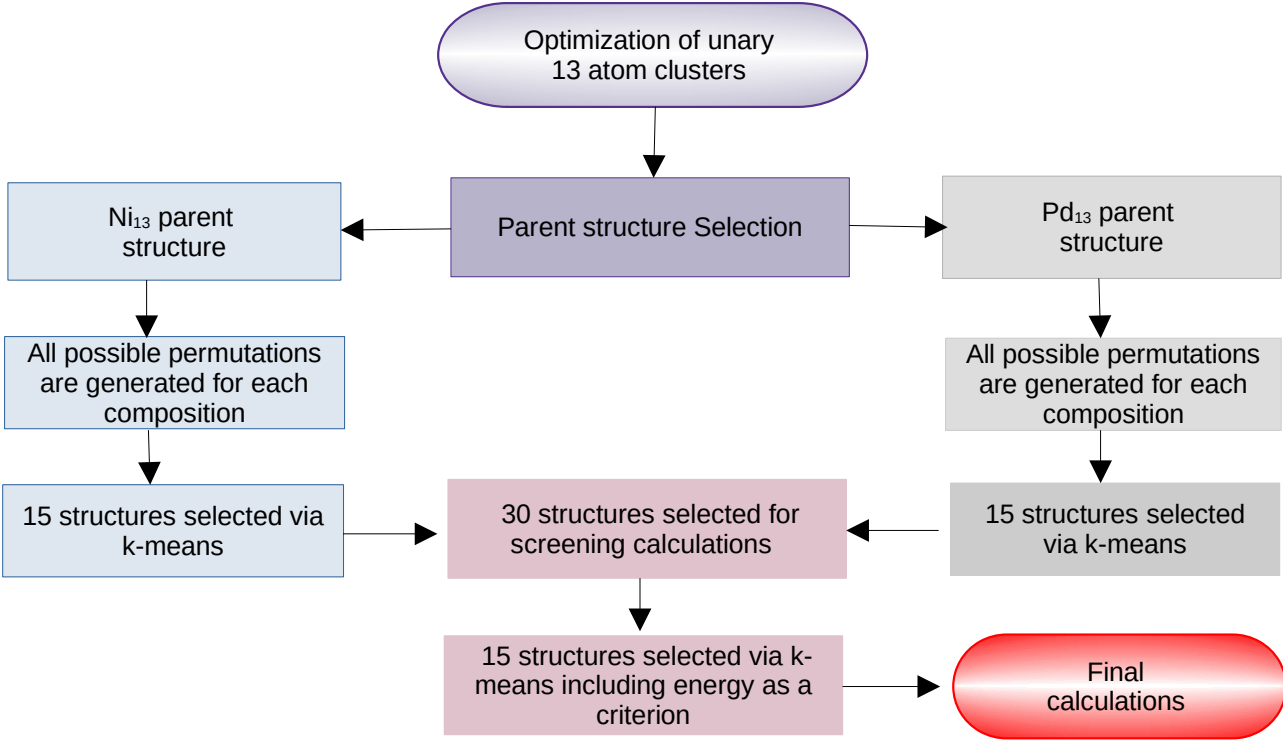

Supplement: d4cp00672k1.zip [file d4cp00672k1.zip]
